# Supplementary material for: Spatiotemporal dynamics and heterogeneity of renal lymphatics in mammalian development and cystic kidney disease
Source: eLife. 2019 Dec 6;8:e48183. doi: 10.7554/eLife.48183 (PMC6948954; doi:10.7554/eLife.48183)
Supplement: Figure 1—source data 1. [file elife-48183-fig1-data1.xls]

## Sheet: Statistics
Branch Number	Descriptive Statistics							ANOVA Summary			Bonferroni multiple comparisons
	Timepoint	E14.5	E15.5	E16.5	E17.5	E18.5		F	8.534		Test	Mean Difference	95% CI	p value
	n	5	5	4	5	6		p value	0.0003		E14.5 vs. E15.5	-30	-244.9 to 184.9	>0.9999
	Mean	74	104	195.3	332	382.2		R^2	0.6306		E14.5 vs. E16.5	-121.3	-349.1 to 106.6	>0.9999
	Standard Deviation	28.77	58.78	110.8	135.2	145					E14.5 vs. E17.5	-258	-472.9 to -43.13	0.0116
	Minimum	40	51	95	227	150					E14.5 vs. E18.5	-308.2	-513.9 to -102.4	0.0013
	25% Percentile	43	51.5	99.75	238.5	255					E15.5 vs. E16.5	-91.25	-319.1 to 136.6	>0.9999
	Median	89	87	178.5	264	414					E15.5 vs. E17.5	-228	-442.9 to -13.13	0.0322
	75% Percentile	97.5	165	307.5	459.5	503.8					E15.5 vs. E18.5	-278.2	-483.9 to -72.45	0.0038
	Maximum	102	182	329	555	530					E16.5 vs. E17.5	-136.8	-364.6 to 91.15	0.7303
											E16.5 vs. E18.5	-186.9	-406.2 to 32.38	0.1415
											E17.5 vs. E18.5	-50.17	-255.9 to 155.6	>0.9999
Range of Legnths	Descriptive Statistics							ANOVA Summary			Bonferroni multiple comparisons
	Timepoint	E14.5	E15.5	E16.5	E17.5	E18.5		F	20.64		Test	Mean Difference	95% CI	p value
	n	5	5	4	5	6		p value	<0.0001		E14.5 vs. E15.5	-13.02	-96.83 to 70.78	>0.9999
	Mean	107	120	192.2	208.5	308		R^2	0.8129		E14.5 vs. E16.5	-85.17	-174.1 to 3.715	0.0672
	Standard Deviation	30.73	38.39	26.32	18.22	63.83					E14.5 vs. E17.5	-101.5	-190.4 to -12.61	0.0181
	Minimum	77.02	80.04	168	192.5	236.2					E14.5 vs. E18.5	-201.1	-281.3 to -120.8	<0.0001
	25% Percentile	83.6	91.31	168.9	194.3	261.5					E15.5 vs. E16.5	-72.15	-161.0 to 16.74	0.185
	Median	103.6	115.3	190.2	203.6	295.5					E15.5 vs. E17.5	-88.48	-177.4 to 0.4079	0.0517
	75% Percentile	132.1	151.1	217.4	227.5	352.8					E15.5 vs. E18.5	-188	-268.3 to -107.8	<0.0001
	Maximum	157.8	183	220.2	234.3	420.9					E16.5 vs. E17.5	-16.33	-110.0 to 77.37	>0.9999
											E16.5 vs. E18.5	-115.9	-201.4 to -30.35	0.0039
											E17.5 vs. E18.5	-99.55	-185.1 to -14.02	0.0154
Maximum Diameter	Descriptive Statistics							ANOVA Summary			Bonferroni multiple comparisons
	Timepoint	E14.5	E15.5	E16.5	E17.5	E18.5		F	5.747		Test	Mean Difference	95% CI	p value
	n	5	5	4	5	6		p value	0.003		E14.5 vs. E15.5	-0.804	-10.80 to 9.195	>0.9999
	Mean	14.31	15.11	19.31	23.69	26.14		R^2	0.5347		E14.5 vs. E16.5	-5.004	-15.61 to 5.602	>0.9999
	Standard Deviation	4.46	3.682	4.922	5.19	6.141					E14.5 vs. E17.5	-9.387	-19.39 to 0.6120	0.0773
	Minimum	8.626	10.3	14.65	17.66	19.15					E14.5 vs. E18.5	-11.83	-21.41 to -2.259	0.0089
	25% Percentile	9.714	11.47	15.24	18.18	19.51					E15.5 vs. E16.5	-4.2	-14.81 to 6.406	>0.9999
	Median	15.48	15.78	18.26	25.76	26.45					E15.5 vs. E17.5	-8.583	-18.58 to 1.416	0.1357
	75% Percentile	18.32	18.42	24.43	28.17	31.26					E15.5 vs. E18.5	-11.03	-20.60 to -1.455	0.0166
	Maximum	19.18	19.58	26.07	29.2	35.21					E16.5 vs. E17.5	-4.384	-14.99 to 6.222	>0.9999
											E16.5 vs. E18.5	-6.829	-17.03 to 3.377	0.4766
											E17.5 vs. E18.5	-2.445	-12.02 to 7.129	>0.9999
Total Network Volume	Descriptive Statistics							Welch's ANOVA Summary			Tamhane T2 multiple comparisons
	Timepoint	E14.5	E15.5	E16.5	E17.5	E18.5		W	10.56		Test	Mean Difference	95% CI	p value
	n	5	5	4	5	6		p value	0.0022		E14.5 vs. E15.5	-53680	-288709 to 181350	0.9909
	Mean	99125	152805	521299	869388	1786174					E14.5 vs. E16.5	-422174	-1900747 to 1056399	0.7593
	Standard Deviation	62400	109180	413186	343727	824557					E14.5 vs. E17.5	-770263	-1596893 to 56367	0.0647
	Minimum	25837	43771	184720	534899	819421					E14.5 vs. E18.5	-1687049	-3277381 to -96717	0.039
	25% Percentile	32503	57913	186041	574295	1139171					E15.5 vs. E16.5	-368494	-1763634 to 1026647	0.8479
	Median	122646	108782	431720	738189	1578428					E15.5 vs. E17.5	-716583	-1502328 to 69162	0.0719
	75% Percentile	153986	269708	946134	1230079	2629436					E15.5 vs. E18.5	-1633369	-3209005 to -57733	0.0429
	Maximum	158253	270455	1037034	1324737	2983647					E16.5 vs. E17.5	-348089	-1464654 to 768475	0.9229
											E16.5 vs. E18.5	-1264875	-2795204 to 265453	0.1253
											E17.5 vs. E18.5	-916786	-2407601 to 574029	0.3538

## Sheet: E14.5 raw data
REPEAT 1			REPEAT 2			REPEAT 3			REPEAT 4			REPEAT 5
Branch length / μm	Branch diameter / μm	Branch volume / μm^3	Branch length / μm	Branch diameter / μm	Branch volume / μm^3	Branch length / μm	Branch diameter / μm	Branch volume / μm^3	Branch length / μm	Branch diameter / μm	Branch volume / μm^3	Branch length / μm	Branch diameter / μm	Branch volume / μm^3
27.8062	12.2375	3201.19	30.4373	5.31617	738.494	21.7495	3.79989	408.919	56.2659	4.30046	1138.2	22.6404	3.28988	227.502
47.864	7.68871	2587.05	34.5309	7.82078	1700.17	35.6036	3.76174	512.045	16.9991	2.94587	105.289	23.1118	4.89897	469.262
53.5175	2.42453	254.232	84.9901	9.16357	7143.03	28.0807	5.12986	651.873	20.8276	4.24466	318.01	26.7527	3.55193	336.572
20.0364	2.3722	88.5546	41.1182	7.61831	2644.11	69.6903	6.75697	3275	21.485	1.6605	46.5267	38.8034	3.67327	428.683
31.0189	7.60337	1514.95	11.2978	19.1753	3291.21	71.8003	10.7725	6469.73	26.2809	4.23472	392.439	32.763	3.54756	437.762
18.5962	4.54669	383.264	109.329	5.8794	3878.4	21.5926	3.45929	422.184	15.249	8.89251	925.495	80.4525	4.95155	1555.38
14.6429	2.3722	64.7173	53.9759	5.17927	1425.58	41.9464	7.28536	1527	30.4244	6.4924	1146.84	46.5973	2.8993	430.318
28.8136	11.9918	3180.91	24.0354	10.6658	2130.19	6.8753	10.3779	601.375	62.8395	6.12745	2346.27	17.5883	1.72434	40.9943
25.8268	7.5814	1177.65	47.3725	14.2916	8111.18	35.1225	3.57359	428.012	10.7615	10.2484	877.269	19.7623	3.14353	149.64
32.2475	6.58992	1296.59	31.074	13.3927	4745.89	34.2325	5.77898	1134.14	22.4177	4.78118	477.072	6.02565	6.45754	200.326
29.7802	7.75079	1355.68	78.3606	13.0966	11966.3	42.7544	7.26301	2221.67	11.248	10.8019	1035.04	23.3323	4.76805	492.897
72.5389	3.88168	967.565	106.089	5.41242	3024.26	8.56392	6.12535	248.928	15.4632	7.38885	681.663	23.31	3.59283	210.686
71.1744	6.85357	3355.36	31.2995	11.0533	3000.44	20.9876	4.63761	359.296	37.3051	8.51469	2462.14	3.74601	6.0516	107.614
14.7862	12.8155	1964.07	68.8443	7.48287	3117.17	16.0849	5.10009	321.069	10.9419	8.10285	544.908	18.4023	2.79354	127.47
41.6473	9.70507	3204.16	7.69991	14.7603	1286.62	69.2581	5.39809	1849.28	17.8716	9.04967	1144.5	34.01	2.21133	132.935
34.9094	13.7516	5399.18	49.7611	14.8596	8799.78	9.90601	9.7618	732.747	38.254	2.97194	281.167	9.99707	5.21619	219.029
71.422	6.00303	2348.12	44.9419	7.58724	2388.86	42.9787	7.5694	2027.2	17.6879	4.7291	295.07	19.3704	3.07443	164.802
28.7097	12.789	3514.6	38.1486	7.34624	1636.69	40.1119	9.59876	3268.05	19.3846	4.32856	274.002	26.4486	3.49469	266.605
16.9884	13.2278	2305.9	70.8902	6.66092	2510.99	22.7515	13.277	3209.08	13.9272	9.77178	1074.35	7.70596	1.76348	17.5267
36.424	4.94805	764.372	75.3056	7.82665	3650.67	5.76791	9.54771	410.453	17.233	9.98764	1411.15	43.1961	1.73927	118.056
23.5064	6.98544	997.61	41.5587	13.214	5967.04	36.628	5.52559	917.024	51.7174	7.48973	3309.27	25.2466	1.63513	51.9285
28.9584	6.53564	962.549	20.8886	8.27357	1069.94	7.7893	8.56173	448.303	31.4994	8.21799	1670.82	13.675	5.40991	329.07
17.0289	11.0935	1696.64	15.823	9.9519	1192.57	28.0632	5.62693	755.676	39.9169	3.88955	643.67	16.2298	2.58415	103.419
30.0474	8.90025	2003.65	36.9706	6.71564	1444.21	127.763	3.26327	1405.2	31.1439	5.03028	631.3	18.2171	3.14894	188.411
7.67658	13.1789	1003.89	74.2492	10.3828	6571.53	35.5064	5.15353	846.334	79.2577	6.80221	2916.61	25.4925	2.7914	255.206
17.0373	13.2373	2318.84	25.1255	8.51136	1414.21	33.7316	8.06373	1669.94	11.0171	5.55077	306.618	31.3848	4.05776	435.703
39.2824	8.48624	2306.29	17.7777	12.0082	2048.1	46.3783	3.84937	535.427	28.1537	8.07787	1989.04	7.57914	2.4947	36.4734
13.4165	2.79243	92.7394	97.3978	7.35625	4626.35	32.8772	2.26907	147.451	13.7927	3.43509	142.914	42.1639	3.85633	453.12
18.805	8.9759	1137.12	28.3538	6.02802	1053.45	20.4354	3.68111	223.701	44.5035	4.8032	930.178	22.4652	3.26446	216.075
33.3656	9.44465	2762.31	10.1485	10.8297	924.411	40.3539	3.30721	369.214	15.6782	6.61968	518.581	22.9432	2.52431	121.655
24.3889	4.55933	501.163	41.4686	12.3661	5008.08	7.8352	5.15042	161.804	97.0328	5.79127	2681.38	20.0632	2.06743	106.919
6.70962	15.2875	1254.27	37.5737	6.49835	2050.83	18.578	4.93659	356.01	6.84959	9.96296	524.113	14.1754	2.35239	80.0805
33.0613	4.30704	669.031	51.5621	5.60192	1296.18	27.6631	5.76364	651.677	20.4988	6.25755	776.611	29.5135	2.60187	170.698
51.5303	9.51121	3667.24	12.5968	6.77483	443.482	20.2523	4.02746	258.515	74.3299	7.84916	3649.34	5.98447	5.63025	149.576
13.5824	8.11417	747.849	47.8605	8.40098	2637.06	63.8421	7.23523	2715.2	21.1528	2.00642	64.6104	14.4057	3.933	172.717
21.021	3.5018	169.979	42.5171	8.62291	2758.26	29.5082	3.67013	346.969	12.1259	4.0678	171.165	11.9992	6.71341	428.042
36.0106	6.96198	1614.38	7.28067	8.96156	519.61	27.9089	7.78204	1924.82	39.8784	5.23085	859.723	32.2942	2.84878	235.504
57.9103	2.82074	378.362	98.1313	6.08952	2903.67	20.8682	15.4775	4007.84	41.7522	2.2622	186.227	11.5272	5.39643	261.151
19.5718	3.03113	138.369	19.4608	3.66217	238.057	67.396	6.05916	2041.89	24.9491	2.24548	103.186	57.0241	1.88147	194.494
36.7779	6.70275	1236.34	32.9178	9.53428	2734.13	11.3088	9.83232	862.281	17.4579	2.94638	116.058	16.1332	4.29013	230.01
22.0221	7.22261	866.973	28.8177	12.784	3649.15	41.4538	7.30997	1755.61				4.18692	5.71955	108.237
57.1695	2.3722	252.672	26.605	7.21442	1093.74	10.36	9.22471	680.253				17.7715	3.75677	195.942
30.9814	7.08277	1491.8	45.0677	12.3158	5521.47	3.29976	8.99427	209.654				5.54177	6.27884	169.053
40.1073	7.56307	2024.6	80.9607	4.53052	1807.16	48.9901	5.07627	1312.6				3.99882	6.08208	112.397
39.6453	6.6084	1379.86	113.646	10.474	10925.6	39.9251	6.68579	1482.06				4.94664	5.36787	113.801
11.2938	3.95362	112.919	59.1673	6.97839	2630.82	13.7558	10.6589	1269.77				12.7997	4.77361	230.412
16.8024	5.74134	414.855				26.0179	10.4476	2355.72				11.2579	4.35164	175.547
20.2491	6.6713	697.125				45.3703	7.68451	2528.48				21.2573	2.64462	157.785
8.61215	5.53512	232.497				41.5073	4.30955	894.615				13.1914	3.33166	131.577
18.3991	4.1806	306.552				34.7239	7.22019	1589.16				24.5225	4.25504	394.702
23.3675	7.11213	909.11				20.6282	7.76284	997.192				51.8916	4.37904	981.101
28.9001	3.32108	275.125				19.1976	6.5527	690.42				8.85148	8.62595	502.46
8.61216	6.85298	310.103				24.8083	9.42621	1723.16				30.6598	2.38812	182.055
26.5405	9.81155	2144.09				33.0347	9.8201	2728.33				27.2849	4.43353	427.462
7.00495	7.38016	301.529				19.7644	9.90172	1511.27				14.4512	7.35273	625.049
40.5663	7.06938	1591.52				67.8652	3.85274	927.994				16.6047	5.05934	364.411
26.1632	5.53195	666.777				45.365	3.17215	873.281				5.29329	5.49853	125.959
20.4487	12.2029	2348.08				38.8601	7.20733	1832.3				32.2292	4.30515	515.392
29.6814	2.3722	131.183				52.3175	8.43847	3113.27				12.1086	5.15649	260.835
9.2837	2.3722	41.0311				4.64444	10.3239	387.628				19.0494	2.51404	124.926
17.8299	5.28618	416.706				35.3607	10.1321	2813.11				12.3813	4.8618	233.081
37.3802	3.42937	403.424				31.9579	5.04398	694.95				6.95505	5.20046	150.153
16.7684	11.1011	1543.13				51.8784	5.06562	1297.78				4.16094	6.15341	130.988
29.332	11.1656	2901.97				26.0416	5.76712	691.7				36.3436	3.24694	323.321
16.8171	15.6296	3140.91				8.45664	3.08198	61.873				24.4627	4.85912	453.994
66.831	2.71989	418.534				12.2961	2.87261	77.4067				26.1927	3.66388	312.547
24.6653	7.43731	1268.45				10.3564	2.99822	72.355				20.5748	2.64235	160.275
54.6432	11.1769	5809.19				31.2602	2.56363	176.926				40.186	6.8075	1519.47
110.268	6.36437	4247.33				52.2833	4.73906	1008.23				10.5092	6.73426	373.319
11.8374	2.3722	52.3175				61.3422	9.7658	4146.12				9.89572	7.24379	395.487
68.5641	5.02836	3078.32				59.5805	4.74468	1094.43				22.8714	2.1399	89.9016
28.2496	17.4573	7017.06				15.864	2.68505	89.0267				13.9248	4.29529	205.32
92.1462	4.56813	1918.42				20.1279	1.9632	72.2712				17.8215	4.04349	238.641
41.2493	8.86868	2655.6				22.3753	4.15997	329.675				6.1297	7.01103	245.441
37.9278	9.60978	3005.67				11.42	6.23628	337.413				19.9616	4.60851	305.513
25.9422	10.0718	2041.79				29.008	4.51661	463.322				13.8757	2.72302	87.577
74.591	7.43576	3634.77				44.3908	5.81711	1232.46				31.4542	3.04077	269.595
37.4272	14.1641	5893.89				134.08	4.12239	2131.09				28.8738	3.25808	393.975
36.4902	5.08336	822.536				161.119	4.23772	3117.39				17.3344	2.70421	129.973
24.9744	9.26328	1621.43				17.369	12.94	2278.74				8.2527	6.41497	263.927
25.8794	6.16104	806.647				33.2967	4.14637	589.361				39.5212	2.48818	204.062
85.2389	6.88373	5128.65				21.9787	3.13159	183.584				27.1753	5.46346	632.921
47.2833	10.3312	4177.08				7.0839	3.03556	52.8495				31.4943	2.28089	139.074
18.3016	6.98769	673.024				116.388	4.31734	1849.47				9.82084	2.45328	45.7093
60.5739	5.70494	1806.65				4.68242	4.84304	86.2572				3.43619	6.03447	99.3649
79.7232	5.71179	2754.26				65.0105	3.62572	708.768				23.4032	4.89473	377.232
11.7421	12.8494	1482.99				20.0004	5.53981	618.553				23.6879	4.69065	387.94
68.2553	10.159	5537.36				35.0732	2.19148	257.945				26.9732	3.22661	244.191
83.0355	6.40957	2909.33				14.2174	3.24688	132.164				10.399	3.4777	110.591
						26.5332	5.89149	711.465				24.726	2.55454	98.26
						34.7928	5.8835	1049.29				57.7344	2.79616	452.263
						36.0915	5.1295	709.866				11.1452	1.31641	19.3051
						31.206	3.97827	451.972				58.4705	2.85982	490.665
						23.1936	9.78487	1804.08
						23.4216	12.21	2755.53
						32.4373	5.49917	819.404
						49.3193	4.78661	1555.57
						58.1746	7.22034	2523.07
						66.5473	6.34585	2731.54
						26.3002	5.56842	741.81
						26.5023	4.59997	444.372
						30.8624	1.78818	96.6761

## Sheet: E15.5 raw data
REPEAT 1			REPEAT 2			REPEAT 3			REPEAT 4			REPEAT 5
Branch length / μm	Branch diameter / μm	Branch volume / μm^3	Branch length / μm	Branch diameter / μm	Branch volume / μm^3	Branch length / μm	Branch diameter / μm	Branch volume / μm^3	Branch length / μm	Branch diameter / μm	Branch volume / μm^3	Branch length / μm	Branch diameter / μm	Branch volume / μm^3
32.4821	11.1466	3122.21	87.0803	8.06268	4694.4	18.0414	5.43992	421.675	72.6715	3.31834	673.717	54.9465	1.89705	243.048
73.9636	5.94793	2589.92	27.9787	10.1589	2579.77	24.2273	4.676	444.95	28.586	4.59761	582.642	19.6034	2.77982	121.711
70.3839	7.017	2980.64	41.9938	9.27031	3115.75	14.4578	6.5304	469.333	37.4227	6.50066	1285.05	21.0646	3.81602	241.074
38.9883	6.72346	1428.27	27.4687	2.39706	174.569	14.8889	4.81184	297.674	108.408	4.75784	2176.59	9.15074	4.10171	118.077
42.5434	7.80355	2124.23	66.9183	5.83804	2160.02	9.6712	7.70903	430.906	14.8549	9.0586	938.968	49.7316	6.76253	1962.76
38.2719	6.88176	1468.88	8.71874	1.1861	9.63354	37.6974	3.61113	475.672	55.3814	1.52715	115.716	67.9352	5.89791	1927.14
96.3273	8.27448	5463.19	40.5303	3.06559	296.469	70.9555	3.58059	861.748	52.8303	9.12525	4282.44	12.1495	6.63755	413.495
24.461	7.63971	1055.52	32.038	4.88956	660.737	20.0377	4.95855	507.848	68.6628	5.75713	1923.36	10.704	7.80343	504.343
31.3835	12.6863	3900.35	51.143	4.69389	1359.89	12.3306	3.89841	150.834	31.5426	4.00962	411.304	3.91205	7.77643	190.646
20.9019	8.62756	1218.36	13.3435	2.20389	45.0129	13.9148	6.35479	427.529	10.3124	7.65684	480.67	78.3187	5.49001	2139.18
9.33686	7.70966	428.8	6.41402	1.1861	7.08701	18.3129	4.71017	356.897	7.95279	7.4143	342.649	64.9743	3.18601	622.787
34.5474	3.84783	455.781	79.2476	7.31624	3903.92	14.0579	5.96481	436.329	14.8803	3.69929	151.729	62.3264	9.10825	3781.91
11.7046	7.37606	473.489	18.3732	7.66554	826.655	34.8515	6.32946	1164.64	71.9295	4.97848	1968.38	25.7014	6.97595	1093.94
19.2667	5.77594	481.07	13.3269	4.08543	207.317	17.9783	7.65081	831.658	50.2883	3.2225	505.172	18.897	3.86498	233.296
50.8834	7.36843	2180.78	28.3961	7.65537	1308.5	27.3585	7.42155	1196.8	46.5272	6.0334	1377.79	17.1967	3.55859	245.611
26.8457	3.18649	240.502	34.7164	3.52754	407.664	60.2158	5.45414	1463.14	40.5267	2.74001	436.335	105.578	4.58829	1779.04
20.7811	13.4453	2868.83	21.019	2.32122	76.1696	59.5782	5.02936	1327.61	29.6021	6.74336	1051.64	26.6224	8.48704	1593.83
30.5332	13.8754	4500.95	64.1085	5.22388	1482.74	43.3067	7.23676	1844.29	25.111	5.81505	680.331	26.5044	8.06879	1352.57
71.9436	17.242	16233.9	14.6437	6.65644	541.344	9.30295	5.45625	220.991	31.2271	5.98321	899.482	60.2001	2.54127	344.465
49.0318	10.3812	4101.6	99.3791	4.55325	1950.02	10.7792	6.48109	358.509	37.327	7.76335	1756.17	17.4388	4.38881	367.097
46.9577	8.09231	2672.88	20.6148	4.29019	247.136	31.8279	5.46423	778.414	100.657	6.55911	4061.25	38.5402	7.80371	1939.38
32.2048	5.99868	948.764	31.8186	7.63461	1451.78	34.7779	4.15522	723.391	34.2062	7.89188	1758.58	36.6974	8.90764	2174.8
23.8547	4.66452	409.364	34.5566	4.29659	535.112	4.70156	10.625	415.828	46.4185	3.0786	494.799	4.17945	10.297	341.807
48.3814	8.2272	2545.16	2.86347	8.43447	163.935	53.0036	3.52616	662.978	106.775	4.24762	1578.89	23.3675	8.765	1389.17
66.1549	7.76623	3199.08	72.5264	4.43946	1237.76	9.12268	5.18589	189.247	55.74	3.50548	712.438	25.3058	7.47585	1082.52
51.0692	8.97908	3244.69	31.1828	6.76972	1075.23	15.4111	2.62492	124.612	6.25968	12.6517	786.932	35.8411	7.45439	1582.33
25.1055	9.96297	1947.4	18.0734	10.8737	1645.51	22.4086	3.79428	291.177	54.9687	3.16718	590.383	11.3156	3.09035	95.8352
69.393	7.04684	3208.25	34.4886	5.76592	1309.68	9.6462	5.71489	255.66	112.634	5.42169	3020.09	29.8216	4.20275	528.031
18.0352	12.4779	2230.82	66.032	7.64026	3343.77	13.7942	4.03131	173.07	10.9845	9.2402	755.23	14.1148	4.54235	303.716
24.2111	8.19264	1236.38	27.228	3.33603	479.385	20.0887	4.04992	261.687	10.6698	9.72515	787.047	30.8702	4.12724	447.304
19.2391	8.22169	994.333	50.4361	7.2756	2100.71	27.7102	6.72131	1250.97	40.2368	10.815	3681.49	37.0865	4.55282	609.688
33.3849	5.2905	906.17	48.8327	5.13621	1624.91	17.9497	6.14818	567.195	125.347	5.26172	3993.63	39.544	3.81104	617.856
22.329	7.80578	1014.4	8.43101	2.75755	47.3094	36.7442	6.18123	1151.82	24.9138	4.53897	434.402	72.1859	4.12169	1214.75
54.9052	7.16477	2243.34	12.5558	2.327	50.3141	8.62844	8.6078	492.871	99.5085	5.78722	2894.92	17.8618	5.09065	324.53
94.9345	4.97791	2133.02	84.7058	5.58293	2250.83	12.9756	6.76763	473.252	37.7548	9.54128	2783.95	26.7808	3.41845	413.594
37.9489	5.57859	1018.58	17.9113	3.7447	206.219	30.1136	7.21952	1283.07	63.2049	5.77742	1953.66	10.5045	8.31024	570.879
20.0879	14.891	3524.71	147.955	6.92974	9656.07	17.7323	3.80751	272.213	11.4849	8.25587	604.803	6.02513	7.31453	252.063
11.9113	12.4257	1509.44	81.8886	5.46814	2066.46	22.627	3.55455	236.421	25.5334	10.0381	2163.73	11.7902	8.61573	680.152
27.8046	7.28042	1449.13	12.9938	5.4803	299.768	16.6439	5.23308	460.136	19.2244	7.64665	883.025	64.1128	5.6213	1671
21.5707	8.79264	1284.02	32.6643	5.097	857.875	42.552	6.98958	1841.48	20.0125	4.07398	262.567	11.7787	6.4397	383.988
33.1248	9.58717	2542.02	109.993	5.01679	2338.21	29.0109	4.85751	847.721	24.064	9.85161	1818.14	5.99619	5.36909	138.381
17.4595	5.12924	412.176	30.5537	5.68326	830.489	15.181	12.2608	1832.49	9.03935	10.2795	750.188	8.34206	8.01683	420.98
41.916	15.1326	7885.77	81.5855	5.19377	1769.72	28.1664	4.75475	680.036	18.465	6.15752	520.127	21.2177	6.90611	778.249
22.6984	16.1349	4668.03	103.545	5.94513	3570.62	39.9636	5.13873	947.77	9.98878	7.90728	487.929	34.0348	6.57669	1278.27
22.0798	11.3593	2229.34	137.954	8.28114	8142.89	82.0355	5.88697	2388.55	23.48	9.04348	1402.77	5.43013	8.32966	288.683
60.2358	14.6528	10463.2	11.3954	6.23396	346.638	4.73084	2.11111	17.2567	45.7381	7.88023	2329.71	2.99022	8.05371	152.33
83.0333	8.98724	6438.66	83.2332	3.74325	1199.14	15.8327	3.26467	140.614	45.1446	4.17185	809.224	28.5296	7.33203	1201.16
72.7384	10.8141	6836.94	38.9718	6.2462	1302.47	8.95717	4.90284	162.632	48.1111	5.52093	1509.4	40.8542	4.96532	804.978
54.2701	10.9859	5417.41	32.1517	5.90202	1154.11	74.61	7.49131	3487.36	21.3932	7.87796	1044.86	24.9062	7.93954	1123.38
50.1766	4.08555	703.737	18.8876	10.9353	1834.18	24.6622	3.91188	327.39	67.2367	4.95232	1491.64	8.30978	5.37104	183.209
43.3119	5.10805	1244.22	85.6593	7.80178	5597.66	2	1	1.5708	90.9009	6.75076	3647.98	23.0064	6.17068	672.608
23.5188	4.89342	713.507	48.2645	6.45996	1768.79	4.89898	1	3.84765				17.2444	7.84889	829.652
28.6779	15.2625	5207.06	185.886	4.08047	3035.7	17.03	5.85265	502.888
23.7221	8.43792	1309.29	22.29	2.97335	188.074	18.3656	4.18421	259.497
22.2001	15.4887	4140.81	56.7401	3.52313	814.871	22.9343	7.27919	959.201
52.9087	8.47485	3320.16	143.156	6.24291	5835.11	22.9043	3.94338	312.002
15.2252	15.8146	2990.67	46.7401	5.71387	1311.5	14.9811	3.40577	163.237
97.7899	9.79315	7885.38	130.015	5.37833	3131.02	28.3151	3.91085	344.643
15.0818	12.9853	1969.58	63.8815	5.56941	1779.6	66.2599	3.83197	884.636
54.9772	6.54418	1916.06	8.25886	10.0376	659.742	5.42706	7.32	227.917
35.1098	13.5402	5066.19	23.8742	7.40671	1025	31.1682	6.7431	1131.01
38.1229	12.6599	4839.41	5.03222	11.3338	508.787	6.42288	7.28889	268.022
58.5501	14.4941	9834.88	52.4645	6.73526	1658.59	6.99484	5.76157	185.618
124.655	10.5866	11420.9	18.4645	19.5826	5615.54	18.1186	4.69642	311.889
39.5201	5.77731	1185.82	99.452	8.8926	7783.69	14.2799	6.35819	457.962
46.6314	4.74653	1029.03	41.0481	7.62111	2559.85	15.3492	6.15661	455.12
48.7367	3.44229	599.232	21.2793	2.55497	89.173	8.48403	7.32629	355.623
48.1601	10.5027	4460.77	83.8615	3.20811	716.358	15.0439	3.81866	219.242
34.1356	7.78487	1631.07	38.1664	3.9294	637.868	11.5122	7.26873	478.659
23.6884	11.3816	2380.71	10.1468	8.2335	533.916	3.65028	15.7778	729.889
56.0506	9.12	3866.33	67.4894	6.17128	2250.41	38.2859	3.37648	411.725
87.641	8.08307	7005.21	58.3446	5.85433	1722.79	13.0393	3.81284	177.923
33.6008	12.4152	3946.56	30.5846	7.04352	1240.57	3.41421	8.88889	210.72
14.4485	13.0349	1934.17	6.17757	7.03763	239.097	35.1611	6.64511	1203.74
21.9871	15.0324	3929.98	47.7028	4.95621	1125.87	24.1126	11.1484	2478.59
92.1716	6.3583	3350.74	25.8796	4.69201	459.712	18.89	6.03206	1050.93
15.7869	7.33684	656.182	18.4835	6.40867	595.08	15.355	7.7321	732.382
86.3183	8.49649	5092.87	65.3529	4.76961	1364.2	25.0302	7.72043	1194.78
41.7201	17.2486	9810.44	72.5177	6.33048	3068.24	6.38212	3.07622	65.2678
78.7733	7.74046	4484.92	31.1932	2.01871	147.128	21.9493	2.86359	249.594
50.668	11.6022	5424.15	21.5406	3.72487	285.736	8.0049	13.1964	1104.47
55.6861	3.17296	499.686	65.6393	6.82136	2838.63	10.0549	8.12259	520.846
43.7895	3.90701	558.647	55.6535	4.69654	1204.93	18.797	1.79634	61.1783
29.2107	4.04025	465.103	118.579	7.94616	6930.73	14.0314	2.71496	85.9703
62.3844	3.51884	868.242	75.4138	6.14932	3343.59	18.5977	6.86658	701.257
21.823	7.25845	911.338	13.4632	5.50973	303.964	37.2289	7.24483	1666.83
24.8153	4.3572	377.784	15.855	7.56488	838.768	29.7818	2.80609	287.035
			11.7418	5.7328	300.936	28.5859	3.12949	295.624
			34.7349	4.95617	679.812	22.1648	3.97065	278.613
			62.6075	7.46512	2927.5	28.4798	3.94659	399.239
			32.1222	3.94066	515.289	19.2383	5.05526	434.329
			7.2928	12.6571	942.623	6.55973	6.79808	232.804
			57.9899	5.24133	1864.21	18.5996	3.252	170.152
			146.15	5.40575	4179.44	20.5963	3.27742	197.453
			72.9989	9.41368	5468.83	33.7389	3.62864	422.232
			59.568	7.20375	3406.41	40.1542	6.831	1823.35
			21.2946	5.75674	546.379	31.1313	9.17631	2126.66
			14.9828	7.5643	660.785	3.44949	5.77778	94.5068
			7.08545	7.9073	347.947	15.2756	5.11193	315.376
			52.8822	6.12117	1592.07	19.079	3.70284	256.535
			34.299	5.07262	676.114	3.41421	6.66667	126.557
			83.4688	7.94563	4172.01	24.206	4.18595	382.2
			94.414	5.53782	2358.33	4.26002	4.89526	84.5897
			24.1577	6.28236	750.307	23.8858	2.14694	106.602
			22.5419	4.68233	388.475	11.4	1.97211	39.3654
			26.1501	12.4548	3166.72	8.95575	9.67291	634.736
			40.0583	9.98143	3168.3	32.224	4.70215	677.734
			28.7954	9.06997	1961.82	10.0686	5.44148	226.628
			10.8296	8.26502	587.396	21.1049	4.63442	394.923
			5.07528	7.1413	208.73	20.5908	3.23094	216.041
			21.8367	8.12437	1122.14	81.2151	4.61651	2036.21
			41.5874	5.57522	1092.1	24.0845	7.29247	1027.09
			8.15046	7.01443	311.727	32.4749	3.87992	460.658
			5.54869	4.41386	83.6023	33.8918	4.71819	604.051
			32.8294	5.93052	944.524	33.305	8.01207	1713.57
			9.97273	11.3721	1042.98	5.59423	7.72391	270.05
			13.2985	6.99186	500.691	10.345	9.75588	792.861
			6.33919	17.3294	1520.23	9.72255	7.04804	377.813
			24.569	17.127	5653.38	15.1574	3.2116	151.238
			29.829	10.7679	2812.36	26.5314	7.97738	1352.18
			23.1188	4.8999	576.104	39.7342	5.86331	1228.06
			33.5425	5.84368	1360.3	2.73205	11.1111	265.533
			23.9824	7.9258	1214.56	13.6249	7.40405	644.126
			17.979	9.67536	1265.75	68.0827	4.98137	1392.96
			19.1157	6.48165	587.848	34.0676	2.70689	245.177
			24.4507	2.74207	131.784	4.31897	7.7708	206.933
			27.6965	3.07174	198.937	11.2893	7.38437	466.875
			15.5161	13.5455	2272.79	17.4827	6.78256	637.378
			45.3098	4.62207	1322.56	24.3195	6.26633	798.696
			39.7923	17.3165	8794.83	13.3781	4.77927	234.518
			17.3714	8.99504	1195.53	41.769	6.31514	1335.97
			36.6173	14.4744	5943.63	34.3898	6.46302	1303.22
			5.91118	10.661	505.628	29.1087	2.09652	109.902
			62.6797	7.40245	3549.05	38.5188	7.27808	1740.5
			70.9155	6.89533	3106.69	5.16763	12.2813	615.607
			36.918	5.18742	812.289	25.7064	12.1859	2996.87
			24.5807	7.71439	1067.28	33.2486	9.59754	2528.65
			24.1162	10.563	2558.94	5.20837	3.66472	53.2926
			12.3948	2.68802	87.361	13.8181	4.50482	221.992
			43.3631	14.3797	7003.03	51.121	3.14716	780.499
			24.2167	2.9001	192.079	23.9992	3.53988	261.178
			82.9794	9.31978	8032.09	6.74639	2.90155	43.5288
			37.3564	4.75473	643.52	19.9739	3.1812	181.993
			78.768	7.10945	5469.64	5.93925	2.63558	32.2433
			43.4931	4.56056	816.794	10.2349	2.63839	55.4361
			78.0648	2.89136	771.645	8.58976	2.9967	62.8123
			24.3541	10.3121	2138.73	10.8724	2.5676	56.7439
			29.9542	5.51997	725.083	23.2496	3.89039	304.641
						4.33761	12.0948	497.631
						7.27818	1.95831	22.2517
						10.9107	2.46405	51.7386
						5.14693	2.39007	21.8832
						25.409	7.78694	1270.63
						15.8356	6.50131	520.945
						12.3053	8.35124	672.942
						5.90182	2.66667	32.962
						5.75123	2.58573	29.7735
						26.0456	3.71487	378.071
						24.3353	3.64497	353.967
						21.0264	2.37091	124.261
						20.0065	9.52833	1463.17
						41.2516	6.56303	1410.85
						4.68556	8.66667	276.411
						18.4637	4.31293	315.662
						9.69705	6.91292	399.268
						42.4711	3.8123	558.722
						11.1043	3.39182	108.379
						15.5147	3.81748	190.706
						20.0521	5.39763	480.07
						4.24264	6.44444	148.59
						4.78935	5.77133	126.653
						23.4418	3.76331	343.84
						4.73432	8.20704	256.633
						15.5258	5.29647	347.213
						25.2486	2.18872	142.336
						30.433	2.61354	160.458
						44.8134	6.64041	1603.81
						29.2368	4.74217	546.431
						8.82522	5.529	231.717
						28.0224	4.76065	548.482
						7.13717	2.77357	43.5244
						24.3502	5.99483	692.714

## Sheet: E16.5 raw data
REPEAT 1			REPEAT 2			REPEAT 3			REPEAT 4
Branch length / μm	Branch diameter / μm	Branch volume / μm^3	Branch length / μm	Branch diameter / μm	Branch volume / μm^3	Branch length / μm	Branch diameter / μm	Branch volume / μm^3	Branch length / μm	Branch diameter / μm	Branch volume / μm^3
66.489	6.64217	3120.29	84.3514	8.41635	6858.09	174.346	4.77676	4012.83	82.8969	5.66755	2260.47
32.8754	3.10822	268.542	150.502	6.88513	8529.68	116.472	7.26887	5493.16	43.6458	5.1653	901.968
79.2925	4.37733	1298.6	103.94	5.47282	3325.96	23.0341	11.0214	2196.81	33.8641	4.83157	718.545
20.1671	4.81246	374.353	48.9729	10.1297	4111.42	72.6057	6.85684	3830.8	33.2243	6.21905	993.771
18.9568	2.3722	83.7833	6.8161	16.6053	1477.22	47.8592	7.63665	2200.78	6.34435	8.39844	352.456
24.7267	6.77884	894.715	114.734	8.93761	7443.72	134.731	5.96612	3794.42	105.71	6.67038	3936.69
58.7487	6.98896	2821.38	67.6692	6.6075	2433.66	69.4654	6.6931	2909.69	87.3779	5.1549	1996.78
32.9135	3.62695	369.702	71.2085	8.16506	6131.16	106.426	4.91176	2877.48	69.1957	4.17292	1050.92
19.5776	14.5146	3300.29	66.5448	9.17472	4582.6	51.7679	5.56553	1306.85	76.0841	5.3747	1717.92
217.005	10.2312	18960.7	47.7595	10.096	3840.57	41.6681	3.20765	523.969	115.485	4.96706	2421.31
83.925	4.18906	1340.47	59.6094	6.98522	3299.33	32.7481	4.60886	582.532	16.5322	3.81067	206.913
29.4589	3.17525	246.814	68.227	4.37533	1145.39	36.4461	4.11822	537.041	15.8928	6.81714	580.421
26.2241	3.47043	275.162	100.106	7.37873	4498.9	14.6987	7.11554	634.992	80.3657	7.42383	4026.22
32.3035	9.3501	2212.82	36.21	4.74183	1035.47	54.5988	3.43731	723.508	34.4839	7.34072	1640.37
61.4523	3.83308	828.56	78.2702	8.23554	4796.78	58.4106	6.07624	1676.87	45.8032	4.25465	1024.92
45.5737	4.54247	833.539	27.5759	12.9097	3681.77	26.6134	9.69358	2357.06	41.2194	4.87521	929.198
152.989	8.45667	11695.1	15.0076	12.4756	1839.33	27.8957	5.8335	918.054	28.6461	4.27904	419.697
24.5718	6.42317	793.126	12.8118	7.43856	545.555	15.1819	4.11059	228.433	30.3281	3.57372	374.991
44.2571	2.57309	241.348	134.515	4.68196	2393.01	44.4367	3.53447	453.256	27.131	7.99768	1476.04
25.7814	6.32932	784.645	28.9831	7.25388	1393.17	13.9533	2.43808	62.8128	31.6033	11.2764	3503.59
157.76	9.55193	12312.8	32.9235	13.4041	4733.78	127.429	4.677	2480.87	120.98	4.67228	2386.31
114.875	11.7448	13052.7	8.24663	16.1112	1705.01	34.218	4.15054	674.482	23.532	14.4246	3951.05
69.8975	5.57954	1770.53	11.0633	14.2203	1758.08	10.4276	7.64222	474.025	38.8397	5.87289	1057.45
68.0435	3.81361	816.885	40.2549	7.34337	2394.31	46.3996	8.37398	2898.68	57.8122	6.07168	1689.85
24.4794	2.3722	108.192	50.1615	8.57198	2964.33	22.0622	9.89549	1677.63	26.1714	4.1177	340.091
50.8408	7.02237	2114.34	23.9873	13.8054	3573.4	109.825	6.2918	3695.9	7.73382	5.53507	186.093
32.2287	4.2982	526.81	173.512	5.71298	7432.8	35.0116	6.7826	1266.22	6.17758	5.52334	147.922
48.2637	4.56687	1223.98	47.6311	13.3704	6636.36	37.9693	6.29314	1214.13	48.7949	2.91961	327.712
45.962	4.17746	739.879	46.2763	4.41038	896.356	2.86347	7.9073	140.617	20.9722	5.67921	598.516
29.3851	8.86536	1813.97	92.6937	5.77821	3877.74	19.0053	7.65893	860.539	50.2508	3.69364	672.028
28.4484	7.49603	1333.26	72.6067	5.46687	1946.79	52.0084	6.58072	1884.38	76.3233	6.2884	2469.62
159.182	8.86017	10234.2	66.2763	4.23462	1057.41	25.7496	6.39182	864.06	9.73355	12.3677	1202.04
37.9358	4.68235	664.626	67.5238	5.42215	1588.44	78.1825	6.15112	2367.5	84.1442	9.0091	5783.25
49.7478	6.34861	1895.34	72.668	2.84105	520.433	37.062	7.50363	1668.43	45.9643	13.6396	6702.55
30.1697	6.55559	1068.99	11.4715	3.29072	96.5615	9.62507	7.83491	462.989	20.9758	11.135	2109.34
29.6846	7.55722	1348.46	30.0523	5.37544	673.623	32.3245	12.0117	4131.88	34.9694	4.31671	582.205
54.6597	6.37778	2025.15	223.585	5.07031	5231.54	5.12891	8.13319	264.367	45.3343	9.89587	4173.65
37.5725	4.78112	811.214	8.88364	9.55399	635.272	43.45	7.45812	1897.41	36.3116	5.17147	790.753
40.2605	8.75772	2567.41	31.7793	7.01533	1374.34	16.3697	6.64475	567.669	18.2629	14.6541	3091.35
64.8478	7.42707	3072.6	31.2247	7.56686	1515.26	162.718	4.13432	2519.55	16.3284	10.4244	1499.1
91.3625	11.8421	10417.4	20.8934	2.8037	144.257	9.52011	7.15038	386.962	24.1796	6.31926	774.428
23.7958	15.884	4790.26	80.9513	5.4619	2593.83	28.0871	9.25524	1850.57	25.5739	5.41129	710.386
28.2465	3.63755	396.047	51.5778	9.56066	4181.62	114.725	5.78	3361.39	59.368	8.20708	3180.22
92.9253	5.40999	2424.09	8.57328	5.26181	167.914	49.4001	6.59134	2616.78	37.0155	6.11017	1120.46
133	13.5323	21161.8	15.7144	7.0567	613.738	13.1515	8.09115	680.084	56.5827	2.35523	308.325
23.9501	12.4424	2937.43	32.8245	3.52149	343.266	54.7643	9.01803	3661.22	30.4762	12.7	3925.97
148.749	6.61938	10137.8	23.7575	3.15754	183.874	54.0486	10.5869	4865.62	36.0091	8.82391	2304.58
37.1496	13.6767	5369.85	17.4775	3.30788	152.162	16.0793	6.02832	570.94	70.4013	4.17651	1237.21
36.9022	11.6434	3807.41	92.475	8.74579	5632.48	29.672	8.12515	1522.28	25.8645	5.93236	744.903
53.1032	11.2124	5676.03	7.01241	8.76874	430.508	59.6707	5.57855	1738.66	30.8038	5.38026	701.102
61.5718	7.0568	3132.11	48.3125	5.81201	1558.29	21.2049	9.94477	1637.66	47.9085	7.72857	3069.9
63.7773	9.38451	4695.9	83.1788	4.50896	1814.03	8.91676	16.3417	1932.48	46.1151	11.718	5006.93
34.4051	6.19368	1049.63	7.87952	7.10128	320.391	49.0023	6.68039	1777.05	67.2602	9.19178	5136.33
49.2969	7.65489	2773.92	18.5648	8.78288	1118.72	29.0335	10.3416	2830.82	32.0823	4.2375	486.026
21.7396	23.072	9479.56	38.1767	7.72197	1742.89	13.9458	7.63543	620.212	43.325	5.02688	886.865
33.0615	6.49707	1648.5	17.3135	10.7588	1587.08	11.648	17.0157	2606.19	24.7803	6.47795	928.511
40.7725	12.4193	5280.56	81.0371	7.24654	3543.3	42.6314	10.2812	4212.25	10.5717	7.32158	478.764
34.3461	9.85565	2738.63	27.9806	6.74587	1148.44	105.948	3.45357	1195.97	54.8196	9.94885	4117.49
17.3841	7.8838	819.035	96.8236	5.13686	2174.2	107.456	6.28301	3371.91	9.19889	10.2175	762.045
61.9296	11.0617	5974.19	17.9757	5.8257	493.772	36.5986	7.85745	2105.5	9.07376	9.91399	698.091
33.6777	4.25992	549.868	19.2303	4.0181	343.598	29.1787	6.91504	1069.93	43.6281	11.0894	4258.57
35.2814	14.0578	5197.69	15.7811	3.84672	318.573	15.8147	5.72145	400.771	12.8618	11.9906	1373.85
25.6278	12.5156	3186.28	120.995	4.52177	2462.34	11.5971	5.68114	294.386	44.1347	4.89548	1095.44
63.7246	16.2593	13297.3	33.1786	4.27839	493.876	44.2898	7.1254	1827.13	9.72667	13.4424	1409.07
126.584	9.34042	9280.29	21.5755	5.5372	609.073	7.19175	6.44109	233.128	32.169	11.1505	3288.89
26.4095	8.91563	1738.64	27.9039	3.087	207.595	19.9133	13.6162	2890	10.3605	12.9729	1398.37
17.7683	14.6388	3126.29	59.3605	10.4877	5171.77	21.8646	12.9625	3204.13	28.3166	4.21161	422.85
35.2962	7.79219	1730.12	30.6598	4.89259	665.439	5.85404	16.515	1249.37	28.5832	8.82598	1833.78
20.0792	20.5838	6736.28	13.5901	10.818	1232.94	12.2721	2.18832	69.2517	47.088	7.82921	2577.48
151.262	7.22665	6676.84	17.223	4.09782	400.394	12.274	7.51908	538.895	103.878	5.89767	2880.67
21.1096	5.63475	558.835	67.5845	5.17715	1589.41	20.5888	7.66829	932.597	64.0926	4.91062	1273.18
44.3199	4.23138	774.664	16.0033	11.3601	1630.71	10.5369	5.78562	277.248	110.437	5.42571	3950.83
33.746	17.1647	7807.42	32.0581	4.43452	477.564	8.85217	6.74253	321.116	7.59775	12.4539	939.955
30.2214	18.6187	8225.53	9.14682	7.1165	357.531	26.8603	4.68397	475.792	49.9443	10.2821	4517.98
51.6215	9.59476	3867.93	18.3926	9.09957	1199.94	74.5028	6.48037	2507.56	40.7066	6.2936	1280.62
50.621	6.01385	1480.46	12.2681	1.96266	38.712	14.9796	13.9838	2350.33	16.7882	5.99988	471.598
55.4914	10.771	5083.05	23.2268	4.68362	421.504	52.0252	10.9073	5216.99	12.624	12.1793	1451.81
25.0093	10.737	2248.66	113.601	6.66469	5852.62	121.4	9.23394	8947.9	6.79128	6.77798	251.697
48.467	11.2385	5242.01	58.1482	9.80589	4015.51	66.6949	7.63417	3084.35	7.13623	7.45397	312.292
63.374	17.9405	16484.5	124.901	6.42735	4284.65	17.4487	13.1143	2450.14	13.7748	7.40658	575.071
18.1151	20.3177	5989.8	23.3194	3.59087	335.103	70.9506	4.04402	979.633	60.7446	5.62386	1676.93
38.2256	11.9789	4213.9	41.8222	8.66198	2966.34	84.8218	7.72786	4819.34	12.6804	6.37795	398.566
27.3048	7.57599	1353.82	33.8944	5.06709	784.425	13.9254	8.01996	696.737	6.31088	6.96711	238.522
23.8139	22.4766	9400.69	36.9395	4.48306	867.833	37.2537	6.22094	1236.66	85.8467	4.43843	1460.54
59.6172	10.2149	5658.91	13.5256	4.749	231.793	15.7266	9.49844	1183	52.8982	5.8281	1425.23
44.6397	13.0041	7052.25	13.8118	10.3232	1168.06	79.5303	7.74538	4413.23	14.0207	7.80009	662.691
26.4286	20.4607	8496.79	17.8083	9.7764	1340.37	20.7251	5.95258	970.093	8.00463	7.75833	374.678
24.4738	3.95366	437.08	37.8806	4.10672	1202.52	11.0517	13.3366	1563.48	8.58785	7.90728	421.725
21.0583	10.2964	1765.13	25.8907	10.266	2344.33	142.38	6.65197	5494.43	63.5286	5.39366	1484.88
34.2176	5.44552	1104.83	16.2328	6.19189	457.584	21.5257	4.03685	626.942	12.104	5.42241	278.179
33.0005	2.96797	261.642	19.1217	9.3018	1283.04	12.8585	11.4944	1331.88	11.9335	5.36222	265.312
21.5556	6.0551	613.081	51.0343	10.9988	5865.46	41.0029	5.72587	1150.43	64.5817	8.28927	3643.8
20.6175	18.8123	5799.61	45.0197	6.29769	1519.32	29.785	6.80505	1362.78	36.1818	3.00281	328.07
33.1351	4.15923	668.19	34.8834	3.56283	351.649	140.554	7.7234	6885.8	24.1871	2.45301	137.936
117.479	12.9523	17292.3	34.0852	2.73087	525.261	34.5944	4.86767	786.959	3.83832	4.21721	47.6457
96.5378	9.57058	8000.72	6.01288	7.29266	253.397				65.9369	5.89197	1935.44
112.819	5.74123	3475.34	26.0279	9.66221	1865.88				62.3828	4.96982	1360.61
43.8641	4.10144	617.468	82.3767	9.76471	7424.75				85.2477	8.07709	4380.77
9.26554	8.43446	558.143	9.22107	8.35875	505.125				31.0838	6.65761	1165.65
38.3706	6.19184	1276.72	10.6787	5.77864	273.636				18.5248	8.20199	944.756
56.9425	12.7041	7571.38	33.2849	5.46381	793.742				8.53015	7.48826	367.757
53.1445	8.61181	3058.04	3.81665	4.54667	64.5421				7.09662	7.18423	281.552
84.521	14.297	14314.8	35.8905	3.44883	357.839				47.5227	7.00309	1832.89
28.3689	3.82188	486.901	4.32963	5.5351	104.182				44.3696	7.13216	1806.44
41.8337	4.59691	955.163	25.6133	2.80023	186.366				28.2131	4.68915	488.665
44.431	13.405	6293.48	13.6853	7.78044	666.028				16.0575	7.31029	681.999
71.5946	8.16662	3977.81	47.0004	6.31204	1519.12				31.4696	6.86108	1211.45
14.0163	6.7112	474.884	61.0956	6.1588	1845.93				66.3839	6.10597	2067.56
27.2995	17.1515	6377.3	22.8873	7.3708	979.481				171.865	5.4319	4485.82
17.7477	14.2655	2803.34	18.9084	2.91925	126.896				6.87217	9.21681	465.753
45.8371	10.3781	3959.57	26.9414	7.69339	1241.26				16.7285	10.8709	1545.13
35.1411	4.16075	484.178	17.79	5.21874	395.74				37.0197	4.65909	800.408
106.151	9.42494	9142.17	20.2064	3.75546	237.085				65.1299	10.9363	6108.42
42.764	13.1349	5767.63	42.3244	10.3204	3534.88				35.7843	3.45269	350.319
30.4822	6.72532	1194.8	21.7985	11.6507	2500.2				51.6194	7.52054	2444.22
59.0584	13.9134	9033.4	25.8062	4.75886	512.352
55.5194	5.89526	2401.78	66.0441	9.04557	4483.34
76.8568	6.02035	2323.24	118.331	7.74894	6106.58
41.931	13.4925	5993.7	56.8082	7.76358	3538.92
15.8231	6.52774	591.488	52.3463	9.77721	4413.01
27.7153	14.0117	4264.69	28.5204	4.65872	477.623
54.3682	12.9092	7418.82	7.69739	9.89855	596.889
35.7352	8.44933	2169.22	17.1982	10.153	1398.6
43.9692	8.744	2693.81	28.712	4.53947	686.329
50.1579	5.8509	1505.75	36.144	9.7076	2714.45
28.9222	17.7985	7575.43	26.6669	10.0814	2156.65
76.5591	11.246	9223.4	30.2602	4.70024	585.927
62.4299	10.5917	5577.15	7.21714	5.7987	204.381
109.652	15.2749	21266.3	12.4434	6.18675	386.929
33.2947	15.4239	6085.61	27.407	6.85203	1168.12
67.1079	5.13523	1611.84	14.3711	12.4656	1742.55
46.2325	11.9409	6017.16	20.1921	11.218	2003.09
32.4898	5.62261	1105.73	8.73478	10.2505	718.672
37.6226	8.10718	2230.48	17.7649	11.5276	1840.75
37.8459	12.0526	4742.41	24.8173	11.2267	2499.31
216.649	9.02225	18020.6	17.2992	3.45678	178.875
35.5498	17.9543	9331.7	9.80336	9.33164	655.154
48.1311	13.6323	6962.63	15.8862	17.826	3979.41
58.1192	6.08773	1812.84	14.88	13.7203	2237.38
26.6198	16.8556	6457.13	7.99065	9.65081	566.24
42.271	7.06757	1708.84	64.8025	3.07489	501.397
52.6094	9.01179	3446.11	35.1448	9.31291	2785.99
24.8456	3.68003	308.417	36.4682	5.46592	870.264
110.185	16.5922	26016.8	28.712	7.37175	1296.45
14.4412	3.14289	101.605	11.2464	8.53659	636.013
19.6294	3.69005	179.866	13.6423	15.2445	2470.59
17.3228	9.37923	1170.06	18.4477	15.2075	3384.94
11.3317	12.0401	1254.27	42.5675	6.57027	3078.69
44.953	14.6014	7957.25	26.4572	10.6434	2432.44
34.6974	5.88022	1458.87	40.0047	3.82679	914.099
13.8983	3.36059	114.509	92.7531	8.45879	6252.87
49.8615	13.6476	7503.37	15.5123	15.2846	2836.04
84.7199	4.74666	2025.05	21.1897	5.16369	428.179
33.6132	3.92257	432.042	75.9549	7.44802	3196.54
66.4691	7.25389	2949.27	100.923	5.10296	2932.34
110.192	10.755	10942.9	70.5209	6.54711	2374.84
93.2339	5.43192	2305.54	10.1999	6.33329	316.316
25.9602	7.68125	1223.73	5.0322	12.3881	606.815
28.56	7.53446	1260.36	26.5096	11.1658	2596.94
32.5964	8.74808	1987.08	24.6342	5.28177	657.367
166.437	10.8032	17469.8	59.7174	7.95584	3009.66
133.01	11.3516	16483.7	19.8124	13.3676	2751.23
24.5781	10.1367	2012.73	27.0959	4.25528	642.706
78.6953	6.23077	2405.8	6.19013	10.2795	513.73
29.1608	4.69257	632.048	5.0855	10.2795	422.054
86.5884	6.10218	2599.09	115.211	9.48597	9443.67
14.0384	25.164	7162.28	10.1762	7.90239	499.144
43.8797	9.54897	3890.99	28.2606	15.724	5480.66
34.3331	14.6585	5751.87	8.35879	6.16193	242.425
28.3643	12.7504	3567.61	122.178	6.67476	5821.71
11.9596	13.332	1627.51	20.5475	11.9794	2283.28
53.4049	17.7078	14639.9	16.4712	6.63797	569.914
76.0104	6.8694	3784.71	35.745	5.56653	1124.61
132.109	10.061	10690.3	71.4657	4.21089	1237.87
26.6953	13.1776	3689.42	74.1093	4.88636	1548.86
10.43	26.0703	5618.72	73.3	6.51604	2733.6
27.2142	24.4188	12723.5	18.5392	9.68258	1355.72
8.09917	24.2491	3786.95	24.3564	10.7144	2091.78
18.4518	10.0555	1438.61	19.4936	11.1831	2045.37
47.7242	19.5554	14359.2	62.8475	9.12851	4320.54
60.0979	13.1923	8972.5	5.42279	7.90729	266.298
44.4083	9.96087	5139.44	9.60985	7.88104	468.309
12.6538	19.2247	3751.54	10.7431	7.72638	498.779
12.9065	21.7638	4912.71	55.0532	8.7991	3749.29
23.5379	15.4187	4505.77	14.2254	10.0619	1066.26
23.1755	21.473	8333.13	14.4342	10.9121	1321.37
88.1768	14.2598	13593.7	44.511	6.94558	1958.37
24.8288	8.94899	1692.69	4.04959	11.861	465.583
12.9375	13.1788	2010.84	56.7323	5.08653	1263.89
35.6876	10.7046	3229.13	32.6168	9.93266	2635.04
37.1986	11.6297	4027.1	27.0175	10.4791	2446.77
17.2401	12.8842	2167.14	18.8546	11.7626	2210.23
44.5659	6.57027	1940.98	29.2566	8.09317	1790.5
120.87	15.8091	25276.5	26.8313	5.09733	826.391
10.6492	21.912	4010.64	11.4123	11.6509	1292.33
82.7593	8.55906	6771.31	25.1797	8.45501	1349.14
52.2511	2.68459	298.981	23.6714	6.75533	863.933
69.9212	9.80027	5587.46	26.7444	7.01199	1054.42
41.3592	11.0107	3972.12	78.434	7.45852	4108.44
56.7262	6.82891	2588.43	72.9736	6.90844	3677.33
37.1052	7.33268	2058.25	43.1978	4.48373	998.45
33.1651	11.5623	3417	22.1269	11.4392	2192.13
37.8585	4.94344	747.563	17.4634	11.2576	1705.26
14.7267	13.4567	2144.83	43.1978	6.32892	1388.76
98.028	12.239	11889.2	32.3855	11.0698	3193.93
25.8396	3.5292	315.044	26.2029	7.64543	1232.84
33.5014	6.23866	1027.31	69.6506	10.4431	6142.58
29.348	2.86639	202.171	20.328	7.47873	895.111
49.6591	8.12524	2524.74	61.1492	10.628	5693.76
21.1541	7.83999	1043	36.0968	8.59959	2161.43
28.8773	5.94478	927.087	57.0708	7.60714	2588.31
150.842	7.12352	7453.56	41.7745	5.13032	1198.58
17.5968	5.54654	406.515	6.43309	12.722	821.375
14.6478	10.4971	1312.83	15.0155	9.27274	1010.18
17.2062	12.3947	2126.78	11.2289	10.2549	926.235
51.6422	2.73987	319.137	12.6974	9.5366	892.335
22.0925	18.1591	5738.7	48.9845	7.55678	2725.43
65.1754	5.25447	1780.34	27.2461	4.33461	854.199
54.3138	5.2927	1741.8	10.3902	10.7553	926.962
27.9282	20.8625	9573.66	6.27711	11.3269	642.528
80.9231	10.6172	9397.16	11.6443	9.20061	789.338
22.6402	6.2321	681.347	11.5282	7.9073	566.122
56.4645	14.2578	9131.96	15.7043	8.74165	937.355
72.764	11.9318	9340.85	17.7026	13.5855	2554.46
18.0886	2.937	117.017	9.2598	7.78439	437.269
92.2522	7.15122	4359.6	11.4628	12.753	1504.11
40.8701	7.89943	2196.47	11.5821	9.79217	965.465
44.6853	3.03985	425.117	13.721	8.16473	698.116
26.7684	2.81147	158.673	7.00016	10.2795	580.953
17.947	4.03645	237.101	19.5224	8.46536	1118.2
13.9774	4.69221	251.25	5.28595	9.48877	373.793
14.7963	4.34902	273.435	38.8952	4.10804	684.624
15.7183	3.70345	203.101	33.3433	2.35245	173.763
25.3056	2.3722	111.843	20.5809	8.40863	1142
75.7352	5.25942	1768.01	13.9087	8.77348	834.864
26.9948	6.89595	1014.48	14.9332	8.00406	738.742
20.4958	5.48975	527.574	14.9252	8.46496	849.046
13.4452	3.0311	87.6657	3.83829	9.75236	294.671
44.7824	4.18313	736.701	64.156	8.71355	3850.03
47.4343	5.68846	1299.46	28.8362	9.08017	1921.83
43.2238	3.63854	490.643	25.8804	11.0337	2490.5
13.8135	3.77611	155.534	169.319	7.83504	8580.74
35.5833	3.15861	294.777	36.1201	7.41028	1738.38
			10.4562	7.73948	488.287
			31.6703	12.3722	3924.95
			26.7354	8.96941	1762.77
			28.5096	11.173	2876.92
			16.1034	8.07186	823.521
			6.09926	7.9073	299.518
			18.8068	7.55514	840.646
			8.11543	7.9073	398.527
			29.7113	6.34516	1106.22
			18.5213	1.94422	77.4761
			13.3911	11.9343	1505.72
			26.8019	9.88236	2055.2
			16.8755	9.60437	1243.9
			14.725	8.37595	817.711
			37.6441	12.8077	4843.7
			73.0665	3.78292	1611.4
			18.3709	9.04422	1218.58
			13.3239	6.97686	511.49
			9.4426	7.81764	450.088
			24.8192	8.19746	1267.26
			11.5767	8.42146	633.598
			26.8302	11.4087	2769.66
			15.0557	18.1128	3966.33
			12.8109	9.22758	845.501
			14.0224	8.00505	714.494
			14.5259	10.2575	1199.76
			17.8836	10.1409	1437.93
			17.1592	7.71556	793.009
			63.5413	8.60449	4628.53
			39.982	12.6111	5080.83
			16.9965	3.1859	138.242
			26.2829	7.5004	1098.13
			86.5129	9.78945	7414.47
			6.27703	11.2406	615.172
			12.5056	10.3673	1053.87
			12.3735	17.1315	2924.16
			52.3805	6.49753	2572.09
			51.9946	11.4888	5655.86
			3.35474	11.3338	346.509
			9.06066	11.7136	980.528
			41.7022	7.73001	2188.04
			18.582	13.0372	2526.84
			35.4787	12.5428	5091.95
			37.0548	15.076	6692.74
			27.4334	3.01254	242.191
			19.1863	2.39071	112.966
			41.5694	2.807	292.014
			20.7621	13.8685	3140.18
			121.19	8.25582	11029.7
			23.9926	15.3595	4618.78
			78.3441	6.29782	4099.07
			15.3033	11.5175	1612.24
			11.2035	2.40919	54.4207
			5.60057	6.7778	200.402
			13.6495	5.42734	316.907
			26.1545	10.2634	2322.86
			32.071	2.58927	213.566
			51.7685	4.66771	895.115
			70.4746	12.2987	9067.58
			24.6347	3.66708	417.204
			29.2116	1.82301	88.9656
			8.96564	16.0942	1824.51
			20.3399	10.8089	1870.06
			62.6842	8.32406	3669.19
			50.8807	7.84274	3255.25
			8.78516	19.5047	2646.06
			107.963	9.28223	7876.22
			42.5785	11.6794	4833.07
			17.9145	2.02082	70.2607
			42.342	4.72451	786.073
			29.2711	10.0788	2591.71
			28.8834	7.84319	1389.03
			56.244	8.86894	4042.72
			36.4296	3.96576	646.785
			36.2459	7.08761	1431.05
			127.537	9.0031	8179.4
			53.2662	5.0125	1584.16
			40.252	9.84734	4001.18
			79.4022	13.1106	11090
			4.97158	19.1753	1469.75
			25.3574	3.64447	389.581
			71.3725	6.34725	2662.96
			19.8406	5.2504	429.134
			35.3253	5.95064	983.749
			61.6074	3.59781	636.479
			48.8771	11.5945	5159.55

## Sheet: E17.5 raw data
REPEAT 1			REPEAT 2			REPEAT 3			REPEAT 4			REPEAT 5
Branch length / μm	Branch diameter / μm	Branch volume / μm^3	Branch length / μm	Branch diameter / μm	Branch volume / μm^3	Branch length / μm	Branch diameter / μm	Branch volume / μm^3	Branch length / μm	Branch diameter / μm	Branch volume / μm^3	Branch length / μm	Branch diameter / μm	Branch volume / μm^3
196.172	5.68206	5397.18	108.176	5.54333	2813.03	31.6977	4.88441	693.413	88.3613	7.61877	4129.66	27.6748	6.08781	795.647
70.5809	11.1185	6780.12	76.0113	4.7095	1506.81	28.9859	6.2449	875.808	44.6943	6.85643	2161.94	36.6943	4.42943	614.847
34.4904	5.41556	736.263	44.8534	6.31317	1336.05	17.3686	7.37762	738.787	21.3886	4.52877	375.823	82.072	9.15282	5373.91
72.4192	9.53349	5314.59	106.98	8.89232	6435.44	29.6756	3.10813	306.389	10.7275	4.9087	201.393	42.9182	3.22048	435.043
47.2517	5.21233	1197.96	33.5458	5.45514	833.734	32.6529	9.09106	2234.57	36.4599	5.54531	973.42	26.2758	6.06125	1016.94
236.655	10.6677	28173.4	51.3256	5.61537	1648.5	64.3953	6.85646	3140.18	67.7219	9.00208	5564.7	9.79146	6.32578	307.723
19.7212	4.14958	408.337	22.9107	3.25115	196.439	19.9641	3.69401	295.583	14.9959	8.78484	909.814	38.9925	3.48019	392.677
53.0434	10.5283	4669.64	32.9869	6.48978	1136.92	54.2382	2.8643	373.522	74.542	9.46336	5254.51	29.1231	9.63231	2146.1
41.8369	3.42436	410.589	21.8917	4.19831	294.663	21.9209	7.07061	1118.18	77.4133	17.7524	25361.3	24.677	7.54362	1170.35
81.0147	4.73911	1450.94	23.6786	5.72786	606.319	40.8282	3.46452	649.539	109.443	7.14248	4594.12	25.28	7.7314	1299.03
29.1515	4.81056	643.959	25.534	4.10575	341.794	9.73494	6.50033	332.818	8.49905	7.95672	413.269	22.2902	6.89132	837.59
109.752	8.0964	6044.65	42.9922	4.02255	549.056	35.1406	3.45753	335.333	46.7639	10.3789	5486.41	17.7473	4.24626	264.888
24.8488	10.232	2044.68	36.8401	4.22694	588.719	37.2504	2.81477	242.836	51.6889	4.17651	990.668	49.2272	6.11317	1594.79
121.816	9.14145	8114	43.5664	2.34729	205.812	23.7957	4.59585	450.105	129.207	8.38373	7378.98	23.6902	5.89172	692.367
37.4071	3.79024	643.299	33.1737	2.0297	133.314	38.0308	2.07311	173.026	68.5916	12.1956	8165.06	25.8017	2.74876	164.93
66.0504	9.83333	5349.88	19.0822	8.8457	1168.94	25.979	9.58505	1863.84	68.7371	11.4492	7363.74	27.6779	4.41981	432.533
23.1645	6.76654	830.232	64.8518	3.87324	769.48	36.255	10.2272	3018.79	15.3733	7.28993	650.389	10.5437	3.3606	85.9758
31.6959	8.74731	1931.34	5.30075	3.36059	44.8886	29.0728	8.05731	1515.85	15.7278	8.31744	854.612	60.3243	3.31522	567.549
39.9447	9.90214	3113.28	9.55692	3.41009	87.5925	34.9337	5.60876	943.287	10.933	8.08666	558.983	22.5136	8.1709	1144.65
17.2029	8.36981	931.705	13.09	1.90493	46.4992	32.5852	2.66619	240.532	113.295	5.45813	3440.67	7.84165	7.9073	401.335
28.4581	9.54118	2020.55	15.2342	3.16292	119.698	9.03929	4.74425	178.351	27.2523	8.67067	1632.98	40.9383	4.3468	664.57
93.5786	5.34937	2243.02	21.0259	1.74856	60.9452	49.333	1.81607	141.872	150.151	7.00578	6248.34	65.8299	9.12689	4387.1
10.0516	9.45581	704.919	26.6817	4.21766	533.778	61.6037	7.72719	2929.17	153.476	6.8644	6161.11	41.744	6.1965	1272.29
29.0662	8.36454	1598.16	22.1893	2.12249	95.1313	148.153	7.76579	7175.82	40.7906	8.67286	2541.99	606.921	6.54388	23081
48.5955	7.31322	2045	28.8522	7.994	1481.35	20.4845	2.77189	128.179	6.70957	12.6517	843.495	20.4653	9.27054	1418.9
13.9429	7.34582	584.224	19.8907	3.32956	264.922	26.4066	3.41501	220.827	2.86355	12.6517	359.992	104.72	7.72866	5210.69
21.3178	11.0759	2467.55	4.91969	7.90727	258.318	30.1356	11.1539	2982.31	4.54082	12.6517	570.85	32.8799	5.71631	1242.65
12.5557	3.652	145.513	23.0866	4.86305	573.25	30.868	5.52988	794.933	19.7441	10.0408	1671.57	137.901	7.73772	6859.16
147.965	9.26333	11863.9	39.0057	4.10956	791.125	18.9072	12.2049	2184.93	15.473	12.1731	1811.93	13.1014	8.93776	837.822
8.62707	7.91831	431.595	71.4761	5.11704	1762.75	121.866	3.88373	1554.16	63.7214	6.70036	2330.34	114.67	8.95896	8020.78
27.886	4.42115	423.093	19.9449	5.86491	536.119	10.2138	13.4307	1442.15	13.9498	8.64771	813.717	30.1724	11.6827	3307.22
7.28405	7.70334	339.291	13.8654	3.03177	100.068	51.459	12.0776	5969.16	25.2176	8.67711	1491.66	63.7077	11.6619	7191.91
71.6144	6.44267	2483.97	5.03218	1.84504	15.1702	142.785	8.15515	7745.03	20.9934	6.68706	694.618	120.936	15.7578	23842.9
15.0995	5.53511	363.334	45.3559	3.33404	449.482	47.7569	8.4925	3254.19	21.1191	5.98024	594.882	45.895	16.7344	10029.8
9.51152	4.88044	178.383	17.4725	2.57259	98.3944	98.3858	5.09376	2639.39	21.1573	4.58428	369.358	13.4145	15.2874	2439.35
11.0739	4.69142	181.419	10.9099	4.77229	229.247	144.086	7.50606	8464.19	69.3656	6.1056	2434.8	23.7106	12.6297	2872.75
53.6949	9.32277	4948.23	7.43549	4.74538	121.753	56.1582	9.64075	4459.97	61.3418	9.36642	4332.47	62.5361	9.74187	5573.34
44.263	8.17031	3329.27	113.827	2.3398	552.625	18.4975	13.6548	2716.11	8.61227	7.90731	422.927	24.4604	14.4721	3916.06
26.2559	14.7053	4472.17	12.0471	3.40023	109.32	108.309	3.07123	1087.22	24.7664	10.7387	2253.67	37.7735	16.7565	8273.85
129.201	11.1546	13624.2	189.622	7.88475	9872.91	51.8558	10.6202	4870.57	34.0844	5.24726	1110.88	138.434	8.28807	8311.25
56.7821	12.5169	7288.92	16.0864	10.0836	1275.82	20.4616	12.9218	2652.6	16.5922	10.7265	1528.39	33.2602	12.0997	3771.65
17.2333	8.93613	1150.53	11.9011	10.2225	974.451	8.10125	12.3974	982.518	22.5644	10.6325	2043.45	84.6798	12.5395	11871.6
93.4608	7.55175	4843.82	16.651	4.22427	241.503	25.1327	4.31745	406.92	9.30747	10.2513	767.908	18.164	19.4261	5360.64
48.5162	9.54964	3582.21	12.9767	3.9043	155.113	17.4201	9.92929	1345.05	4.42828	7.90732	217.462	13.5474	20.7397	4602.39
34.1034	9.67956	3118.44	70.3338	4.58402	1286.63	42.1278	8.90198	2669.29	53.2761	6.35246	1726.7	9.3758	20.4663	3075.56
26.442	13.6737	3865.87	8.99488	5.5351	216.439	30.1272	10.1751	2433.36	4.3296	9.22517	286.803	43.4183	13.5222	6284.61
29.2235	10.029	2484.95	10.2122	5.53048	245.389	28.8628	6.48811	1233.59	6.49801	10.2795	539.279	38.4622	15.7708	7194.61
21.0965	9.7629	1606.23	9.9625	10.2795	826.802	6.01691	9.65839	448.21	10.9043	11.1201	1060.12	53.2166	7.01093	1984.93
50.0113	6.74686	1870.44	6.22973	10.2795	517.015	51.9042	3.0983	495.607	20.0664	12.2993	2373.1	16.2045	9.7215	1140
14.2367	9.86539	1099.51	9.3905	10.0428	748.681	41.881	3.22668	366.283	64.1392	9.31768	4433.52	128.217	13.097	18534.3
114.065	3.97416	2226.48	58.3443	10.2799	4903.7	82.1998	3.74725	1008.16	10.2452	10.8077	917.521	81.7071	18.0833	20186.7
22.4389	9.58575	1735.09	90.9868	7.49083	4000.54	23.0259	7.81595	1202.52	8.16773	10.2548	673.951	224.207	5.90951	7219.09
5.89427	12.6517	741.001	22.135	5.70171	575.315	22.4468	7.17408	963.795	30.4745	9.67285	2296.91	77.4726	7.05902	4090.56
38.928	11.7374	4360.19	15.7236	1.71674	45.8938	157.255	6.50093	5271.09	20.1228	11.8609	2245.08	57.47	3.45014	643.517
25.5964	13.0242	3297.31	16.8505	5.56588	410.518	23.3921	6.62936	817.342	22.4829	9.51927	1621.49	29.3256	5.46122	702.261
38.0029	2.52542	369.522	12.7641	5.57864	311.858	108.431	6.69241	4972.9	14.8768	7.47068	649.055	95.7049	7.25204	5933.29
114.765	10.7866	10893.9	23.1986	8.36626	1278.76	36.5749	2.91433	298.844	37.4797	6.86365	1454.65	14.6519	8.77121	924.877
109.197	7.52471	5405.71	16.8786	7.22107	696.302	27.3909	3.7757	351.587	29.1006	6.2135	909.367	84.4982	9.58049	6330.62
34.0918	13.5289	4845.22	31.8	4.88143	621.87	32.4201	3.93924	424.005	17.6013	10.4076	1475.77	155.175	8.23489	8834.68
18.5615	16.6121	4046.15	34.5047	5.69067	957.053	25.3463	4.58849	613.314	37.3685	12.2338	4350.04	41.1232	18.8714	12394.2
47.1565	9.0553	3035.5	60.6701	6.02589	1755.72	59.8935	7.49431	2638.5	18.117	12.7707	2316.94	42.1293	12.1317	7640.9
57.8813	12.5584	7227.63	56.1271	4.35381	858.671	24.001	3.15557	188.669	15.101	11.421	1604.29	19.544	29.1972	13098.5
5.89434	8.69806	365.533	38.3752	5.23383	817.31	12.0997	3.05161	87.5327	14.4848	9.38233	1011.12	28.0787	12.9025	3632.59
31.6509	5.15798	789.962	34.4292	5.66849	959.632	12.5443	9.34105	911.066	8.07521	10.9698	759.646	38.3066	6.51313	1393.08
28.4362	7.18628	1158.86	24.0538	2.05241	94.2019	35.0945	3.22909	286.089	38.5585	12.2173	4895.24	45.8256	10.7441	4296.69
10.7344	18.3512	2890.7	7.63065	6.16289	225.062	15.3203	3.16291	120.374	34.7648	4.57208	575.893	49.6632	8.46729	2936.82
27.4949	8.62981	2087.02	27.3212	5.57148	668.682	156.692	3.23865	1377.48	67.3177	5.79585	2512.46	111.212	10.6584	13710.4
37.2841	7.26312	1688.04	18.659	6.74427	680.293	49.9766	9.93518	3950.18	7.33127	9.75308	530.442	105.641	22.8894	43083.4
19.1534	2.00562	81.8561	6.03088	5.53512	145.119	40.8802	9.74493	3346.23	11.8788	8.99566	761.182	46.5756	13.5554	6946.19
84.6033	15.6346	16458.4	21.6936	2.5916	111.896	37.809	5.73618	992.545	8.38431	7.03615	324.104	16.3218	28.1592	10381.7
13.8134	16.8311	3084.72	31.0708	4.96152	556.177	20.3306	6.49579	711.394	4.91969	6.85297	174.751	75.3209	15.9564	16551.7
49.952	7.28532	2084.68	11.0685	5.44648	256.358	68.7012	6.76599	2623.72	15.2377	6.59469	509.059	50.0294	11.3965	8219.12
9.29724	6.41293	305.294	39.2172	10.0455	2885.71	27.7741	10.5242	2352.37	9.72077	9.35099	672.145	54.6586	10.7278	8553.94
7.77145	9.10477	525.205	26.0351	9.43006	1811.48	54.7715	4.19532	900.063	11.264	9.01139	719.445	18.6364	9.89071	1395.4
20.3955	16.0374	4056.73	53.2589	3.24752	523.422	7.73932	9.554	545.893	21.738	7.663	1013.14	24.8052	19.8299	7784.48
26.1922	11.3847	2637.98	44.6583	3.7824	653.917	24.5473	10.8557	2267.09	12.7968	6.59531	468.193	26.4755	18.3904	6835.27
18.5797	15.6007	3558.73	66.8681	3.83151	975.155	22.2611	9.29279	1544.13	71.4205	6.3373	2307.56	54.8049	8.35362	3298.79
17.2203	16.6151	3705.57	50.6321	3.8523	623.049	35.4965	4.40891	872.406	6.98979	7.7155	331.181	29.913	4.93518	627.206
7.54903	13.6759	1111.1	50.2698	5.52298	1202.18	19.9357	7.50609	973.338	73.5536	12.3147	9502.44	39.5358	6.49913	1419.32
39.0844	14.4929	6252.16	46.9844	3.54574	501.412	6.70966	10.9121	637.57	44.0675	5.08671	1109.05	17.2134	13.7322	2549.94
15.7745	9.89579	1206.97	13.252	1.96985	43.1967	29.501	7.13712	1239.18	53.3262	12.3212	8733.9	45.0392	7.96897	3141.37
54.3092	5.57419	1417	30.0688	3.16849	240.869	67.2603	9.78692	5121.97	147.947	12.5729	21679.5	51.8055	6.5978	1901.14
25.3384	10.212	1998.43	13.778	6.89133	544.024	11.3276	8.86597	691.318	3.83835	27.1485	2243.69	14.1556	12.6517	2033.76
12.5065	12.0621	1427.93	28.8473	9.29777	1887.2	33.7449	8.19475	1823.29	24.7409	23.5884	10779.6	36.1859	11.3272	3829.24
18.5343	9.98665	1454.99	47.1927	6.18881	1449.44	13.1795	9.14346	846.859	88.1415	11.8159	16288.4	9.31926	11.0702	896.976
49.9958	15.0392	8980.77	22.9706	6.3749	753.409	10.4547	3.72146	108.922	17.4513	8.55362	1005.68	21.2508	13.0006	3004.87
10.3727	19.73	3167.17	33.8431	8.0557	1927.76	33.5928	2.25781	163.152	32.5062	6.47619	1077.9	20.0772	17.8217	4951.16
8.31641	19.663	2520.43	66.1227	4.37618	1071.46	47.1391	5.48914	1998.57	48.144	10.4224	4192	13.9311	6.67707	487.065
42.3601	3.38635	404.555	79.0607	5.43333	1916.42	25.0401	5.57074	773.666	72.6026	9.15247	5019.96	48.3326	12.1521	6244.41
24.6822	12.9454	3242.78	14.2098	1.1861	15.7007	59.5754	4.98774	1315.62	23.3512	6.18758	684.962	81.4481	9.82003	7389.7
14.9048	10.2402	1227.29	21.9508	4.80236	412.811	51.8903	9.52282	3693.4	32.6386	19.8887	10142.1	35.2114	17.1971	8421.73
10.7789	9.20198	716.014	34.3077	10.9942	3299.48	8.95112	9.11446	593.07	49.0273	5.43549	1258.8	38.3069	7.0642	1730.55
84.9701	12.8111	12136.7	15.0226	12.7357	1897.9	65.9261	4.97852	1554.6	106.769	6.29612	4432.03	69.8349	7.53682	4474.67
36.9583	12.1678	4288.94	43.3837	2.64317	262.509	28.3538	2.50692	147.759	17.9857	3.17114	211.603	56.4278	4.51171	1013.21
7.39498	13.4876	1056.16	160.581	6.35528	5741.61	14.1002	3.12637	108.168	48.9875	10.6497	4779.95	19.5901	23.8535	8685.31
9.09739	12.9207	1180.49	45.6176	7.21189	1866.73	49.3546	6.76514	1796.31	6.70298	7.98477	337.142	97.9524	7.45314	4951.4
19.3533	9.9651	1498.38	59.5665	3.79226	814.331	27.3461	8.99751	1750.29	161.467	10.9408	15990.1	21.4194	18.0079	5448.81
23.1136	10.0724	1833.2	15.2924	5.8123	401.049	9.28798	10.0783	733.328	91.8044	6.85991	3473.78	17.8692	14.5739	3045.37
43.7969	12.3422	6059.15	24.3672	7.8383	1339.62	25.7765	10.0429	2080.82	32.7985	11.1789	3333.13	15.6539	6.44015	513.58
70.9903	9.80932	7378.81	25.182	14.9855	4657.99	124.828	10.3988	11642.8	30.6432	5.86089	1048.81	26.6676	22.4136	10367.1
34.3701	16.14	7134.2	42.3946	7.61211	1924.88	50.8007	9.97029	4274.07	9.39264	4.08542	115.124	100.707	14.8296	17954.2
81.0687	10.1309	6889.33	23.1896	5.43868	538.068	36.1784	7.38969	1605.22	30.6623	4.91036	852.62	60.3041	4.56153	1439.86
5.51561	9.22519	357.473	45.6464	7.57272	2628.5	28.2252	8.92366	1755.03	33.0038	4.08615	926.943	14.2865	18.6811	3930.08
21.2835	10.0878	1684.96	51.9794	5.61335	1348.99	34.5766	6.871	1294.64	81.5637	11.6396	11050.4	53.3585	7.06021	2724.13
64.0804	7.4217	3224.11	26.3266	4.20614	341.201	5.02443	9.75236	378.549	20.5565	18.2109	5324.14	39.3344	7.57318	2969.23
35.2916	10.2663	2894.95	32.2766	13.0609	4324.63	6.83328	9.67412	497.634	6.48446	1.1861	7.16484	11.8284	23.1946	5160.93
46.0551	8.6685	3480.3	34.9651	4.5652	605.366	22.2854	9.98855	1754.7	4.23502	1.1861	4.67937	25.9832	9.75224	2668.56
25.8627	12.5627	3241.45	35.3205	6.01309	1240.41	122.818	5.7512	3646.44	20.9628	3.37267	248.174	35.3544	12.7122	4549
16.9569	11.0021	1623.74	89.8408	2.76465	598.31	13.4363	7.97395	655.559	18.9834	6.22068	654.728	158.344	8.83327	15725
26.2282	14.1524	4124.35	17.5675	3.95501	196.355	44.9998	6.31208	1640.51	45.7773	12.3884	6122.7	20.6294	12.7584	3108.73
12.2148	16.7467	2773.64	11.6399	5.95407	316.824	99.5855	14.3762	17065.7	37.182	8.81053	2552.82	17.6165	20.2167	5626.56
7.46423	19.5049	2239.53	42.2404	9.49506	3001.95	195.815	14.0061	33144.2	11.1582	13.8328	1628.14	7.61734	2.3722	33.6663
70.8402	11.1416	7513.33	203.373	9.66777	15000.8	42.1231	11.7881	4984.32	39.461	7.3726	1680.9	7.92836	2.3722	35.0409
4.73549	10.3412	398.809	10.5652	12.633	1326.97	40.9681	4.56297	668.221	24.8089	15.9682	4951.21	37.2056	15.5089	7000.81
16.5484	9.99848	1295.85	65.078	6.78763	2382.16	20.0626	5.49311	474.92	34.5307	9.36351	2718.52	61.1183	16.3687	13043.3
55.2516	7.01294	2340.4	8.65078	6.1986	266.206	8.54943	10.12	691.11	6.25967	14.2331	1004.03	29.882	19.5793	8983.8
74.1857	9.16996	5668.3	70.3476	10.5384	8334.71	17.7293	10.026	1391.56	8.46775	15.8787	1681.73	21.2767	10.8067	2463.73
33.1147	9.09179	2364.24	28.485	5.85934	799.013	72.8115	5.80911	1951.12	34.6366	5.60682	1153.83	11.2049	2.3722	49.5221
38.6489	9.2273	2745.08	21.4867	4.63483	414.045	34.3835	2.73089	335.019	59.8434	9.11428	4860.6	31.0372	3.50882	346.404
33.2945	11.0645	3166.24	37.9941	9.04688	2580.95	7.14791	6.03696	210.295	22.9322	1.84635	63.5287	29.6012	17.8999	7550.79
41.2592	17.8958	10611.9	18.9664	7.74643	910.784	19.4466	5.52573	466.311	21.6258	15.0779	3875.34	102.395	7.4177	5374.96
12.0186	15.1984	2156.23	17.1273	13.8285	2564.42	12.6911	5.58805	312.306	26.5163	5.3162	551.079	20.1288	10.5834	1809.58
36.3089	6.26081	1193.57	32.1774	7.17276	1578.46	3.35487	5.53513	80.7276	17.3098	2.25879	96.0381	100.046	18.606	30242.9
22.5568	9.05424	1433.09	20.0994	4.58283	332.243	68.5038	4.53605	1143.72	21.0345	6.6513	738.298	35.5031	16.936	8061.59
29.2762	5.63228	1024.12	21.1701	4.442	333.153	66.313	4.19187	1001.33	43.8914	4.84802	932.544	40.0005	8.84231	3427.54
94.287	16.2988	20867.4	13.7162	5.27873	298.246	48.0405	9.569	3460.86	35.0357	8.11211	2053.88	23.0964	13.3685	4442.53
43.9583	13.012	5915.26	22.1424	17.6558	5485.7	7.63003	9.44226	529.864	81.4567	14.3569	13290.7	72.6372	7.77632	4593.3
23.9689	5.6481	597.128	35.2404	10.4825	3087.37	10.8211	8.14641	559.909	7.37098	11.8609	830.434	22.9639	9.20877	1615.76
19.4389	10.1275	1556.32	18.0616	3.95815	224.513	14.8863	9.36501	1019.94	80.2637	8.48079	4425.49	13.3491	8.03085	638.143
31.3853	5.59356	814.548	9.88521	6.35814	298.271	50.2918	7.83916	3022.53	15.1844	3.9577	197.844	164.234	11.8543	18165.4
17.5771	8.27101	985.534	47.2596	7.69197	2477.5	25.9149	3.55393	268.808	68.1059	6.35765	3858.32	31.9411	6.23638	1053.76
17.9593	19.7197	5492.46	49.3925	4.97162	1449.29	12.7279	5.16184	270.621	25.0417	5.91646	829.701	56.8541	10.3558	6014.13
27.358	16.0961	5537.45	5.03222	3.1629	39.5385	14.3584	10.0548	1158.58	5.30082	7.95676	264.916	33.9123	6.47823	1192.33
10.594	8.38271	599.388	126.209	5.44474	3156.09	40.5978	5.43309	936.627	15.4883	11.0113	1482.1	16.0446	8.78812	928.162
28.3426	5.49997	1112	10.705	4.23133	140.817	23.4215	2.35894	121.977	30.0555	8.43838	1844.91	27.1142	16.2866	5740.33
31.2558	9.50218	2160.08	9.15427	5.5351	220.275	154.069	8.07681	8027.46	17.4345	10.7928	1586.72	27.7872	16.1117	5636.77
56.0014	10.9135	5207.82	4.32544	6.96833	168.03	7.64043	7.90731	375.203	28.8617	10.1212	2294.7	17.4235	16.1135	3502.85
85.3821	5.84709	3348.91	10.4182	7.72802	484.364	21.0858	11.6035	2183.87	85.0806	6.62441	3484.89	16.298	17.0524	3798.43
17.6362	8.095	1022.67	83.3849	5.24602	2505	108.87	10.7244	10662.5	60.3575	6.48957	2063.83	26.1096	15.1871	4637.9
13.5887	9.76691	1008.37	62.388	14.2225	11173.9	98.1364	7.21273	4559.23	24.2191	10.3259	2123.16	24.8746	18.7087	6796.74
11.9787	10.2795	994.127	45.2919	10.5391	4029.23	16.5228	2.21349	73.1614	106.077	7.52995	5297.73	16.6654	7.11656	645.222
49.7873	3.84562	635.481	15.8066	10.5147	1339.8	11.9951	3.41669	108.215	57.0725	11.476	6707.76	12.3208	20.2193	3909.09
14.5495	9.36165	987.356	51.5485	6.71008	2150.41	28.8944	5.46963	810.548	23.0074	8.42117	1379.62	3.58969	2.3722	15.8653
23.855	20.1237	7591.97	31.3231	5.99329	866.91	16.7209	15.2758	3000.93	210.061	9.18389	15561.4	90.3613	10.3059	8029.2
57.095	12.5947	8903.21	77.7028	6.8754	3006.63	17.0536	6.75264	627.417	41.3864	12.6713	5193.48	26.1682	8.49614	1565.38
55.5623	11.8693	6222.67	11.413	7.67754	525.672	10.8939	10.0781	872.085	19.6928	4.02806	393.308	21.259	20.0936	6746.59
14.2487	8.82066	847.743	30.7426	5.47085	1173.14	12.4713	8.53229	728.547	18.3495	9.05597	1186.3	55.9653	11.2859	6247.09
10.8349	12.5664	1340.22	22.9668	10.1586	1842.43	26.7957	7.90732	1315.87	19.2037	10.4046	1562.05	24.4292	11.809	2603.91
51.1992	9.42899	4429.81	36.6719	8.99172	2475.98	30.8081	11.0926	3100.71	71.2361	13.8363	11007	27.9729	8.9269	1671.41
40.8065	7.78053	1847.82	41.8251	6.09173	1230.1	54.6356	6.30622	2535.25	7.39182	12.4098	886.459	54.8521	13.9852	8437.45
40.9719	8.59956	2437.48	20.4855	13.4324	2885.41	9.05251	15.0237	1604.77	9.49222	11.7884	1032.9	35.5487	12.0539	4068.8
13.0066	9.00774	863.815	56.2138	6.69464	2272.47	34.2983	3.06835	278.986	30.5338	13.5428	4531.51	25.1615	18.2524	6608.16
56.1884	6.34653	2401.65	21.8412	9.06021	1419.62	13.746	4.90402	254.365	5.94073	13.912	887.49	40.7427	18.8015	11266.1
26.531	12.5551	3291.19	71.541	9.2767	4938.12	42.8013	12.6109	5305.46	42.5891	13.5641	6140.13	30.5093	7.87629	1588.2
8.23176	11.7067	866.557	56.0422	6.54965	2127.63	45.0942	6.48211	1787.21	73.5266	7.20608	5057.7	38.0708	4.97411	868.157
12.955	3.49281	129.18	34.4039	7.05593	1385.89	72.2322	4.22162	1096.6	39.0581	14.3096	6282.23	7.84175	6.85293	313.2
50.3451	3.50548	495.412	20.6605	7.31718	866.1	11.5641	5.53513	278.265	98.3342	9.66728	7684.1	8.29557	10.543	748.567
19.4865	6.81178	781.279	122.863	6.7222	4394.48	5.26763	5.9521	140.753	8.14947	14.4837	1331.13	7.84154	11.0702	754.75
16.6163	7.58633	747.846	139.383	9.20916	9576.12	28.3226	13.1466	3793.23	22.2308	16.5236	4759.68	29.3905	11.7706	3150.48
42.9352	13.615	7299.45	14.8717	9.76228	1119.48	50.6375	5.43314	1179.8	10.8644	16.8886	2412.98	21.7359	11.2546	2174.75
19.9923	22.1902	7852.08	16.9001	10.2035	1379.44	11.4891	6.33712	380.721	41.5339	14.2958	6647.55	20.8656	16.5921	4390.33
11.0292	5.5372	265.631	26.3724	8.53836	1550.78	6.10447	7.82394	290.944	13.2757	17.2213	3050.65	31.8874	15.2193	6205.18
23.4389	7.46595	1025.87	10.201	7.71744	514.5	19.7474	6.2272	628.684	13.4753	17.3654	3189.04	53.9834	7.54909	3375.83
15.7551	4.97518	302.851	11.3249	6.39086	407.636	65.9583	13.5037	9508.7	92.7344	9.25178	7830.19	36.2048	8.62178	2273.6
16.6493	2.23287	66.2182	9.01113	6.19895	259.572	12.62	8.28402	681.402	12.3582	16.8867	2756.32	28.1191	6.39934	892.689
10.808	6.89013	402.693	9.7431	7.72233	459.904	15.0967	7.90733	741.363	15.1938	9.55611	1123.34	7.16347	7.38006	294.953
91.5042	11.9471	11187.9	15.9278	6.48203	537.298	12.5998	14.7905	2148.89	63.1942	12.835	8916.98	71.2721	7.1591	3243.32
8.51251	14.043	1315.9	11.5452	7.09887	448.978	12.4682	11.3506	1272.15	14.9442	15.7776	2935.67	20.6103	11.9403	2299.48
32.3686	7.38356	1387.96	87.8824	7.99107	4885.61	11.3027	9.51883	802.09	20.9875	10.2521	1764.39	147.352	10.4666	13187.9
11.7023	7.47678	521.138	36.332	6.57671	1693.01	9.55043	7.87953	459.102	4.69495	13.4424	692.271	40.5251	10.0588	3540
20.1006	4.8578	510.241	95.2236	8.04011	6494.39	10.1806	7.98649	506.709	8.25279	12.8835	1087.74	46.5351	8.54564	2978.17
34.3403	3.60094	464.344	4.42833	8.43443	239.934	20.2569	3.72821	216.279	31.3438	14.1175	5178.51	58.3106	6.9124	2243.31
12.148	6.57404	432.751	23.4418	8.7844	1437.01	66.3939	4.80676	1312.05	27.3935	15.7256	5344.3	19.7335	9.46302	1420.32
41.814	7.99667	2097.74	26.1452	10.0656	2081.85	39.5716	2.62336	227.411	32.7791	16.6156	7163.94	30.8414	12.5831	3942.61
6.9032	7.91163	334.061	24.575	5.77747	645.862	9.56245	12.3671	1146.72	43.6091	14.8967	7660.31	23.0399	11.784	2416.88
24.7329	8.83267	1489.14	7.61609	5.73278	192.148	15.988	12.2218	1853.55	16.3304	11.3988	1728.21	29.7433	7.59867	1672.43
14.6867	25.7593	7666.13	27.6519	5.89754	757.835	36.9652	9.38497	2695.77	44.8981	10.7014	5027.4	45.8319	10.3101	4211.3
25.1255	10.8086	2350.24	46.9906	3.01904	346.948	114.892	7.03919	4512.34	26.632	12.9657	3552.5	23.4733	5.50654	609.372
24.1654	13.2311	3451.83	7.56099	3.1629	59.4072	6.09235	7.19869	252.167	32.281	18.0576	8219.45	34.9767	5.84467	1890.2
23.14	5.83248	615.778	3.35487	8.43446	190.56	6.17767	7.87885	300.837	19.2889	10.4675	1620.19	6.85908	13.1788	901.116
77.4879	5.75203	2101.86	19.2478	7.07739	784.565	7.21273	7.90026	353.558	72.5858	8.0173	5071.02	36.4361	17.0071	8861.71
7.81569	6.8755	298.547	53.7089	8.89207	3331.92	20.7987	8.61411	1290.95	13.2747	16.4414	2826.98	19.2916	20.4996	6398.79
24.2401	7.56339	1080.45	9.49611	9.80323	724.636	33.5628	7.46882	2244.14	20.8091	14.8377	3738.11	101.992	9.84799	12758.2
9.86144	8.82406	602.022	11.0821	9.14304	729.082	7.03194	6.61395	238.977	49.1913	7.73384	3664.18	94.2436	9.7571	7630.34
21.0437	7.85786	1020.21	22.7715	6.08732	719.017	16.0592	6.77893	571.264	21.5827	2.97314	180.954	27.3729	19.1806	7918.03
15.5912	7.832	748.569	14.6254	7.19057	605.464	22.2026	4.73379	453.08	14.4044	12.0545	1638.65	29.0059	15.9686	5918.85
34.2676	10.6112	3218.06	15.368	3.67352	169.352	21.9227	13.3702	3153.97	4.69495	13.1788	641.607	14.4558	8.43449	878.965
21.1709	6.95854	760.78	8.46441	7.80958	403.479	16.9231	15.3572	3146.95	110.07	12.1061	12794.3	123.192	13.0085	16873.9
20.2709	6.52665	674.021	7.92626	2.43709	39.8642	75.0447	4.51331	2377.31	66.6774	7.95076	3704.86	84.7937	13.0602	12182
25.2904	7.3868	1073.28	32.6132	12.2095	3872	16.4517	9.65187	1208.48	30.975	12.4674	3833.33	29.9405	14.3893	4882.92
84.2184	4.80853	1874.44	23.895	13.4751	3363.21	52.7745	3.56445	573.399	18.0713	9.10936	1218.74	19.3671	9.30109	1570.26
8.78661	7.90731	431.488	10.8116	7.16093	431.925	13.5301	3.92658	161.708	3.35479	6.58939	119.164	38.5288	7.6364	2490.01
62.2793	7.97556	3112.01	34.9122	5.25433	755.575	8.67168	5.13758	173.883	36.5423	3.25239	451.385	33.7993	7.02344	1450.35
17.388	10.8175	1678.07	13.1193	7.80876	626.247	17.837	7.02148	705.79	42.2259	3.1488	342.791	29.587	22.5213	11840
25.6109	12.8473	3347.89	8.81619	1.1861	9.74123	3.55835	4.21727	49.8995	69.0757	1.82724	210.66	63.8214	7.23925	4925.13
48.1811	8.21439	3690.91	22.7597	1.1861	25.1477	100.072	9.48879	8126.14	41.7353	7.84673	2024.19	81.9465	12.0321	10504.3
65.1912	7.45381	5038.36	33.8702	6.1332	1018.19	12.3119	6.53662	406.827	67.7342	8.71213	4492.93	148.452	11.0544	14949.5
17.9589	5.60741	403.641	23.4184	11.8371	2603.35	29.0909	9.16186	1914.18	34.6203	9.12887	2101.23	52.6708	6.24328	1600.51
18.289	7.89208	893.801	13.9548	6.95748	536.231	12.8632	1.36469	20.5997	19.8372	1.45769	40.4593	38.407	14.1334	7966.97
6.01522	6.92513	216.289	22.7997	8.71525	1362.98	18.75	11.3813	1904.9	25.1921	5.19139	512.711	7.84151	14.2331	1247.64
9.96788	7.50106	445.601	17.1692	1.95737	65.6363	14.9341	14.0619	2348.11	20.8146	5.06432	428.108	51.4851	11.3476	5369.71
9.9149	6.7528	336.496	19.1618	6.29118	600.386	22.3156	11.7353	2404.25	15.1905	2.06022	52.2363	44.3945	13.6935	6459.93
14.7486	6.48908	490.712	7.27545	6.38583	224.115	21.2946	5.59733	509.225	11.0982	16.2821	2321.09	116.815	9.67036	9327.98
7.19113	6.34765	232.011	74.558	7.16906	3086.81	71.2892	11.5679	7630.05	44.192	6.66652	2242.55	7.16325	16.3417	1502.96
63.4386	4.69768	1151.1	4.91966	12.3881	580.627	39.3098	13.5476	5671.17	30.5353	5.44811	948.46	6.70957	13.706	1010.43
22.432	5.21104	481.381	85.0207	4.42754	1509.48	42.637	15.5886	8198.53	47.4514	10.9764	4430.39	29.0016	14.9063	5237.16
62.9098	4.22099	923.801	16.8679	6.44163	558.164	94.6646	11.2869	9644.35	13.6968	12.6476	1723.46	147.215	11.6082	16192.8
25.5894	2.83916	184.156	12.3165	6.01106	353.554	28.3669	15.3203	4943.49	13.991	15.294	2557.79	211.509	7.11281	8894.32
30.0402	3.25855	267.08	22.3766	11.0856	2328.32	25.3577	11.2724	2692.78	23.7248	11.3411	2407.89	18.0642	18.5959	5098.35
15.8673	5.99285	431.705	4.32967	5.7987	110.225	18.8691	6.19421	565.045	18.831	13.4453	2677.42	51.1007	14.6121	8549.43
5.32792	9.75235	409.032	21.8045	6.81944	795.056	18.5038	6.63929	647.138	19.2396	13.0444	2528.65	37.2032	13.0144	5374.74
7.46632	13.4856	1061.08	6.16677	7.5308	279.196	19.4517	3.50845	344.973	17.0976	7.78285	801.835	94.2164	5.69283	2719.27
14.8652	13.184	2014.25	9.67983	7.90733	475.355	26.6158	8.14577	1807.92	17.6773	11.6706	1884.46	12.8524	16.2524	2753.17
32.8009	8.66627	1989.86	44.4689	7.21271	1827.03	99.9464	12.5982	12865.1	6.75634	10.7737	607.289	72.805	5.71192	2384.63
19.5656	5.70471	499.155	11.8714	7.99519	590.957	37.2126	8.93968	2832.69	36.6576	6.19132	1456.3	81.3431	10.8288	8056.31
17.0666	6.03504	488.288	19.4267	7.97457	965.882	156.399	7.04056	7785.67	7.59763	9.83476	574.598	28.5522	9.48747	2028.2
6.97408	6.49077	233.811	88.9359	6.58682	3146.46	43.545	5.73905	1153.9	8.68709	9.73632	627.572	24.9439	14.0855	3819.25
14.8337	7.37503	628.128	50.6735	6.9146	1898.43	34.8543	9.05034	2464.72	19.4238	10.651	1732.39	11.1664	13.0489	1433.86
31.5666	7.06104	1358.62	107.526	6.61598	3813.29	70.5278	13.9202	11087	8.57313	13.0632	1151.16	48.9224	11.326	5208.21
9.73883	7.32681	414.417	10.018	10.797	879.925	89.8051	12.4072	11048.1	41.6091	10.6163	3724.43	35.0497	4.09173	557.038
94.1853	4.47905	1998.27	36.1934	5.14834	933.993	19.8131	6.25053	800.605	91.0192	9.49313	6792.48	28.8916	6.0655	858.574
16.2078	9.8351	1223.19	50.018	5.51395	1296.48	14.6248	6.87565	538.968	11.3493	9.20904	744.948	35.2626	7.31545	1477.25
31.8912	2.96147	209.239	12.281	6.06188	354.414	13.2283	3.51224	131.771	10.7742	10.1787	875.088	39.8229	6.4782	1406.19
30.7439	8.99725	2036.39	22.671	6.66374	802.317	21.5113	10.3898	1902.02	7.67448	10.2007	625.937	18.2613	7.71142	808.166
14.7318	8.93534	925.594	6.93234	12.3645	826.384	13.8425	6.85343	514.529	11.5288	9.78889	854.094	51.0701	5.0515	1058.59
20.1456	5.1366	602.451	19.6835	4.78827	399.791	19.2884	7.56587	873.361	9.46141	9.89621	734.435	51.9531	5.42453	1305.99
29.845	13.6688	4373.01	34.5898	3.50406	393.666	44.2176	10.4247	3807.5	7.64101	9.48876	559.119	74.359	3.09494	783.779
23.5231	8.15917	1233.05	19.699	3.84589	228.037	27.8249	6.62364	1357.91	8.16904	9.96658	640.31
164.365	4.67583	2880.03	8.62676	13.7436	1272.87	36.0542	11.9456	4290.28	29.6771	9.65724	2167.94
12.0173	5.53506	289.163	43.1614	14.5024	6729.27	44.8502	8.48862	2798.24	95.5212	10.802	8964.75
25.4161	7.05938	1068.65	19.0696	12.8131	2432.75	9.40621	7.16243	364.392	20.6325	10.605	1846.11
11.654	8.99697	715.244	16.879	8.76196	1060.93	10.3846	7.70386	456.126	189.482	10.1641	16043.5
45.4475	18.7753	9086.81	30.1312	6.0313	864.011	60.2812	4.44812	2200.66	50.2249	9.30311	3422.06
38.9891	18.5808	10754.2	28.0304	5.57692	684.259	8.86203	6.95335	342.455	8.27296	9.67209	598.86
11.7812	12.4146	1418.04	124.064	4.99772	2799.07	33.7481	8.83128	2534.99	5.5156	9.75229	411.251
12.4838	9.78379	937.815	15.6481	7.57431	730.401	58.437	3.75533	645.614	208.591	8.67749	13434.6
3.77134	11.4656	390.74	19.3402	5.80934	508.004	8.78266	8.96018	557.257	7.42124	9.61559	522.542
24.8893	14.2297	3954.38	7.58372	7.71355	356.91	17.1707	9.25514	1156.99	30.7136	11.1982	3029.63
22.431	3.16668	173.136	26.1447	9.63298	1996.07	114.429	12.3033	13682.2	12.9619	9.72144	939.099
59.0808	8.31019	3936	11.0533	7.79543	516.293	85.3478	10.7658	9671.28	84.4453	6.26057	3406.73
78.5824	10.4067	7677.73	6.49039	13.4424	945.167	5.51571	18.714	1536.86	26.2331	6.22923	793.638
12.7165	5.19944	299.553	12.397	7.62199	591.748	151.269	8.07113	10271.3	20.5531	6.6422	716.554
18.031	12.3663	2385.69	11.973	5.71487	302.085	49.0096	10.3203	4428.76	15.0752	7.35662	636.319
41.0336	11.3726	3579.38	61.2733	12.2324	7249.65	112.343	13.7151	16608.1	8.58239	8.32561	466.626
13.0052	11.3753	1307.86	117.28	8.22779	7500.36	82.5618	11.0323	7961.73	18.2753	7.56962	819.84
18.1866	14.5495	3050.74	21.3896	10.5468	1863.84	74.0445	11.9835	9908.31	129.183	6.83111	5007.19
46.7182	5.51486	1295.6	9.39264	10.2795	779.509	67.1277	7.74675	3870.93	23.0881	5.62948	624.317
136.007	7.87156	6706.69	28.2829	9.18665	1880.73	74.5625	3.9875	1026.92	43.5343	6.44764	1516.76
116.709	8.55643	7797.28	42.0398	11.6027	4422.24	38.627	10.9899	3706.2	43.0785	8.9303	2741.81
14.0687	5.34934	321.992	27.8405	10.0495	2239.86	63.5102	4.27505	1295.42	41.5527	3.75982	652.376
7.61003	10.3868	638.895	30.2227	5.69917	1135.02	16.126	2.49403	128.742
8.8274	10.9122	818.264	50.4994	9.83132	3967.12	28.7305	5.77537	1053.37
20.959	8.96753	1325.94	10.3403	6.40262	329.024	75.7105	8.71864	4569.81
13.9962	9.49278	1035.95	4.88993	11.2988	498.074	44.2393	8.44512	2662.01
16.5514	12.7529	2121.35	85.8528	4.01246	1428.49	24.4331	3.29545	249.796
13.463	3.06242	97.7687	83.3861	6.582	3771.66	38.5655	6.82365	1469.49
9.52619	4.7443	166.924	18.6708	10.042	1461.94	17.3806	8.26107	1009.05
22.3573	8.41174	1247.9	9.72664	9.48885	759.472	12.358	11.7983	1370.45
24.1272	5.8948	920.175	20.6768	7.46325	920.149	50.7638	4.97823	1370.67
10.4938	5.20648	250.552	89.9986	7.96529	4972.35	50.6034	5.39845	1614.46
4.42829	8.43442	256.913	29.1416	8.20042	1694.97	39.6587	4.22287	987.28
25.0793	9.12718	1601.54	43.5641	13.4296	6250.59	34.283	12.6373	4324.26
4.3255	3.16292	33.9861	63.9342	6.19682	3055.8	42.9744	7.95919	2242.15
8.79798	5.37724	198.292	77.869	5.30994	1878.67	60.4079	8.22695	3319.09
6.7508	4.26996	104.111	81.4055	11.7463	9218.1
30.2972	5.55602	730.605	88.7581	5.6151	2914.39
31.2297	10.5768	2705.46	30.6567	5.91315	938.38
11.5185	3.31328	105.393	32.5467	10.4362	2789.16
21.8495	3.09889	164.11	19.8735	7.52203	967.417
7.22967	9.95486	561.566	33.8937	10.4983	2992.03
109.621	9.48715	7825.31	46.6233	9.17	3646.14
50.1759	10.5337	4310.11	66.83	6.79436	2987.76
14.2575	8.49906	799.255	21.2921	10.762	1932.81
19.0788	8.44462	1083.75	18.2981	4.95544	373.647
21.39	8.04867	1088.53	25.2115	3.15602	266.928
62.4059	7.71195	3454.15	60.5091	6.83381	2558.93
38.0141	14.1179	6169.95	12.8552	7.6476	583.669
6.53882	3.16292	51.3768	92.3347	4.36567	1677.23
8.2916	3.01927	58.5466	14.181	4.33859	205.182
17.0369	3.21401	138.407	51.406	7.173	2808.66
21.4505	5.7493	623.327	30.5634	9.9917	2407.29
9.18952	9.1477	638.567	34.5045	4.43657	764.47
20.8793	13.5428	2909.69	9.834	6.27132	288.654
9.54261	6.0939	274.031	41.5231	9.06268	2715.47
31.9209	4.06164	502.958	6.47602	7.6317	293.081
4.32549	7.90733	212.415	45.6669	13.3537	6406.53
131.017	3.19481	1381.9	22.3167	8.74693	1388.62
28.3599	7.80388	1352.48	42.5855	2.63744	334.926
8.66865	9.3145	590.643	11.6178	5.77234	300.894
7.68056	8.48119	428.27	57.0316	7.20402	2511.56
22.9861	5.6519	586.987	7.85015	6.81197	298.912
17.7647	7.48368	838.449	45.0619	6.79774	1711.45
25.31	7.71377	1529.33	25.4315	5.39268	819.382
15.345	3.27657	130.784	129.153	8.02761	6572.01
9.18091	2.99075	63.7694	101.552	7.65965	4817.04
224.273	3.82312	3046.96	15.7428	9.70875	1185.81
42.4501	5.97899	1492.82	9.92724	8.05207	493.172
89.6114	6.51973	3162.38	156.183	4.58944	3118.33
33.3784	3.63799	346.561	13.3942	7.27907	562.262
34.0263	8.54833	1923.65	34.1371	3.97084	656.076
9.39275	8.69805	564.535	33.3585	3.86502	419.129
7.00024	6.91537	265.328	50.2126	4.55084	967.981
92.9286	6.60536	3233.04	79.7257	3.88682	1118.38
24.679	2.62034	212.926	80.9956	4.82914	1680.42
41.3339	8.85951	2883.23	42.4279	6.76314	1540.26
24.6061	3.98551	322.886	24.165	3.3677	232.354
23.4223	3.57515	236.073	21.0202	8.68968	1258.53
9.73573	6.67641	338.974	12.0338	11.2977	1221.02
13.6067	10.187	1104.7	3.35479	12.3881	408.84
48.6521	18.2089	12660.7	21.6811	10.4143	1862.3
19.5072	5.34096	452.018	37.3463	8.32324	2039.54
33.9167	13.2923	4636.67	48.3892	6.89112	1944.79
12.8988	8.69911	766.692	85.6527	5.79726	2336.19
23.1	3.68547	288.002	24.3023	3.50866	246.641
12.9817	12.1073	1479.69	8.52499	9.40901	589.898
13.0294	10.6016	1137.5	11.6627	8.90585	733.87
14.3692	10.5875	1268.67	6.6251	10.2532	546.224
2.86356	10.2795	237.65	46.9432	10.6066	4137.39
58.3078	9.1444	3827.46	31.1954	9.60098	2261.33
52.6761	5.76373	1394.75	28.451	3.8985	396.358
9.83746	4.25028	140.413	8.28347	10.1008	665.44
72.9063	5.00569	1628.86	12.8147	10.3308	1073.29
49.1403	5.48379	1579.62	24.8629	6.89393	922.066
17.4661	5.05124	351.905	10.8585	6.89797	403.101
32.0564	19.9157	9901.49	6.63354	7.05999	258.576
10.9217	10.2772	905.961	48.0114	4.66053	904.227
59.773	8.0695	3076.12	52.8342	9.0103	3804.1
60.9797	8.37644	3383.18	24.857	2.01234	92.044
15.929	12.8852	2054	23.6292	2.76445	246.771
28.0216	10.2575	2830.2	6.17768	7.10718	244.983
43.3129	17.1987	10073.8	145.173	7.56222	6665.27
5.08673	4.99767	101.125	6.88242	8.03452	345.793
14.4862	4.20296	200.385	6.47622	3.16291	50.8846
68.0309	4.35059	1303.88	41.6418	3.23851	356.671
123.398	2.89169	928.725	6.42839	7.29227	267.093
89.3021	8.31087	5550.38	33.769	8.07004	1783.79
46.0974	10.5376	2438.8	54.3205	4.95165	1228.47
15.9812	6.22175	487.99	7.6087	8.25942	417.728
7.53409	8.34836	405.39	61.6083	7.40302	2677.41
159.576	4.67888	3436.39	43.4579	3.34785	523.822
3.83838	5.00797	75.8643	15.4776	5.89849	421.662
48.7016	8.48637	3127.48	40.6565	3.61784	549.031
34.5215	5.43643	812.894	13.5815	2.46061	70.3269
18.5628	3.72241	211.401	14.7894	6.37414	457.95
11.3323	6.24996	337.132	25.5603	3.10605	291.502
115.066	10.4145	9715.92	67.9931	7.73589	3461.37
13.914	10.3369	1171.67	31.9232	6.68308	1109.59
17.5511	3.85498	211.792	24.3083	3.27475	406.812
78.1107	4.76219	1416.78	24.6675	3.60075	245.976
5.94714	4.79385	113.587	38.0829	7.832	1867.09
7.29751	5.53508	175.595	19.6016	2.19534	89.5647
43.7814	3.22888	784.692	13.2898	9.50985	945.137
52.4546	5.50065	1447.3	15.0855	5.87374	515.981
59.7174	5.11834	1449.91	32.5069	3.12475	431.528
19.2837	4.49299	336.949	65.7515	4.23909	954.33
21.338	4.57288	360.996	17.8666	4.57137	294.764
46.9851	4.38532	765.233	31.7474	2.79199	222.862
39.8052	4.24641	586.563	53.1483	4.45491	1004.17
9.47854	5.53508	228.076	30.8055	3.51412	286.453
11.9923	18.345	3183.39	14.5593	4.43163	240.98
54.1116	3.11256	453.872	38.9695	3.73382	643.883
59.1765	4.179	899.869	41.0798	2.48249	283.298
12.5792	7.77146	599.101	27.3672	2.72007	163.45
14.7829	12.9842	2022.56	16.2461	1.8487	61.5165
20.7767	5.48609	488.047
8.13472	5.5351	195.742
9.64878	7.90728	473.823
23.7453	4.5496	412.905
11.9345	3.09373	89.9113
13.2153	3.29217	116.529
44.4823	6.42288	1494.84
31.4535	2.09848	131.106
7.45003	4.75735	138.967
39.189	3.93015	514.311
9.20802	3.16293	72.3496
14.3406	6.61606	722.916
6.69122	6.17755	205.174
71.2872	5.74291	1848.69
6.88404	6.21805	204.865
32.9384	5.00891	667.017
23.5779	5.50223	560.431
72.0163	16.4004	15646.9
52.0719	4.04625	709.849
8.41581	4.35887	116.64
37.6545	2.6055	235.831
16.6178	4.21409	237.897
32.5349	7.06208	1498.13
20.0032	3.09586	149.519
18.5875	4.3325	264.416
82.4472	6.10475	2752.84
29.8264	3.74195	360.269
59.8902	3.77791	716.971
45.1221	10.6321	4133.56
17.3744	5.89828	501.638
20.0747	2.82205	140.343
9.50048	1.1861	10.4973
51.9099	5.53511	1249.09
16.5205	5.53508	397.522
60.6219	3.22851	593.576
22.2479	5.00422	504.506
24.2878	3.93226	303.921
32.7056	4.93931	659.034
4.8184	3.90422	54.6333
34.4581	5.41594	1009.98
14.6884	5.33529	334.161
125.476	11.6084	13170.9
20.8834	7.22444	844.848
34.8923	6.42783	1133.17
8.1263	7.20344	323.931
84.4549	3.7541	1049.37
3.83831	3.95364	45.923
61.4314	9.67322	5595.68
10.9855	4.2536	156.799
2.37207	4.21722	33.0042
78.4927	5.80634	2139.48
35.6855	2.92236	309.429
28.9838	5.31009	712.225
55.3499	14.1555	8749.16
76.893	10.7826	7932.48
30.4858	3.24341	257.839
16.448	2.76703	108.496
9.01401	9.38378	624.16
91.3864	12.3711	15446
9.87659	22.1702	3821.65
20.2447	22.0372	7885.66
38.1636	3.28037	325.175
19.1294	8.85594	1321.24
7.71236	20.2955	2561.51
6.74811	20.5763	2242.9
69.461	5.36261	2152.95
44.7981	8.77198	3467.43
11.5793	12.5651	1432.11
7.44678	13.0415	992.887
12.9543	12.8062	1658.22
27.9071	19.4612	8335.29
56.1449	12.2549	7046.24
35.5263	19.157	10201.9
26.4927	17.4877	6410.48
51.8747	12.6156	6578.68
39.0291	13.5119	5722.78
12.5055	7.24441	521.646
21.2033	15.9916	4238.98
26.7792	4.89875	514.521
41.1291	4.78859	750.631
59.2875	7.07676	2329.07
38.9547	6.22863	1198.13
40.0325	4.99361	825.302
17.4011	3.33023	170.789
14.5111	2.5699	72.142
58.4158	3.10578	440.908
6.05244	3.48881	58.0013
4.04955	21.3498	1472.62
31.6837	12.6058	4131.7
12.3143	18.1277	3109.07
48.7973	6.73113	4070.82
10.6574	13.8699	1607.18
12.0562	14.3803	1961.18
40.1921	10.1088	3293.89
165.611	3.08299	1509.52
51.6148	3.04848	437.492
14.5283	13.513	2082.93
30.4893	8.06866	1720.58
60.4708	10.4816	5345.94
33.441	10.8525	3264.17
28.6572	7.80446	1982.21
5.3008	13.6339	768.148
24.837	5.06399	713.842
26.7912	12.0209	3111.12
23.0135	7.35933	1015.95
10.9681	14.5073	1786.81
29.5034	5.8147	1034.35
32.0545	5.80755	927.782
7.38234	10.1622	595.937
22.84	5.40386	706.241
25.4121	7.96403	1263.3
160.747	7.37431	7256.08
45.539	10.5819	4006.9
9.79907	12.0497	1145.99
12.1212	3.72766	125.171
49.876	9.29613	3453.62
9.39261	6.85293	364.299
23.3704	18.9054	6506.67
13.6086	17.555	3238.34
8.02726	6.73997	287.51
40.0206	8.14675	2189.43
38.5106	3.93469	555.374
61.8266	3.10232	763.775
44.4555	6.45084	1803.25
35.4866	7.08797	2084.79
17.2525	11.5033	1787.35
7.86368	19.2411	2289.56
20.7371	4.66103	530.565
20.7263	15.1149	3695.28
6.031	14.4966	1013.87
42.1742	4.39702	949.121
45.1276	9.29648	4248.02
11.8542	21.5395	4306.14
51.4873	7.46447	2384.89
80.3156	13.0568	10744
6.46628	7.095	258.989
4.54094	8.17077	229.008
43.1925	12.8579	6477.01
85.1821	6.16109	2834.07
33.5676	6.42578	1168.39
37.187	10.4458	3387.74
43.9169	11.6182	6790.9
43.1812	9.9405	3413.8
16.4883	9.86179	1258.85
17.6507	11.2107	1876.26
17.8296	10.3588	1488.2
37.7208	4.92338	802.675
31.1453	11.5829	3480.17
39.1598	9.05344	3648.2
50.7394	7.59862	3173.44
11.5896	5.9572	313.469
31.1995	6.95942	1220.03
83.3105	9.14285	5568.01
11.6478	9.05096	754.445
17.7797	10.6082	1543.89
16.6374	7.81678	810.096
37.1356	7.26199	1865.73
17.1016	10.7728	1587.88
66.1556	6.93412	2982.76
44.7506	7.21402	1860.12
43.1728	10.6998	4022.12
6.76816	16.8689	1570.47
25.055	13.7247	3810.22
40.4361	13.0432	5374.24
31.6927	10.4567	2885.79
24.3665	7.5441	1037.16
55.3403	6.76765	1841
14.1728	12.657	1864.48
23.1554	7.1865	930.319
52.2843	6.84708	1807.18
58.4982	10.9099	5664.43
33.6671	4.20423	485.033
35.1971	15.4383	6629.23
23.1965	13.7805	3529.48
26.9256	3.99673	375.825
34.8321	13.5026	5205.1
30.4253	16.0805	6237.75
80.4235	14.2678	12897.3
28.6474	11.6417	2963.02
31.6018	2.99582	256.399
28.7689	6.4744	1197.25
38.03	11.993	4284.58
11.4599	7.8351	550.574
37.3897	4.44611	597.149
83.423	7.59359	4219.74
9.98349	8.18875	533.44
25.1656	4.98006	498.025
15.3969	12.9329	2019.53
47.807	6.1383	1582.48
9.02444	12.8619	1174.1
52.9458	11.4247	5387.45

## Sheet: E18.5 raw data
REPEAT 1			REPEAT 2			REPEAT 3			REPEAT 4			REPEAT 5			REPEAT 6
Branch length / μm	Branch diameter / μm	Branch volume / μm^3	Branch length / μm	Branch diameter / μm	Branch volume / μm^3	Branch length / μm	Branch diameter / μm	Branch volume / μm^3	Branch length / μm	Branch diameter / μm	Branch volume / μm^3	Branch length / μm	Branch diameter / μm	Branch volume / μm^3	Branch length / μm	Branch diameter / μm	Branch volume / μm^3
122.418	13.7076	18422.9	35.7635	4.84229	878.25	238.826	9.74305	19406.4	142	9.29548	10408.6	62.3616	9.77252	4775.82	32.7869	7.14095	1307.07
32.6088	7.58332	2006.01	12.2762	19.5548	3706.9	52.2244	6.76868	2435.32	12.7388	7.28005	546.466	153.913	13.3393	22284.3	88.1699	12.4334	12513.2
73.7869	11.9285	8694.4	26.6423	6.13257	777.809	21.0695	11.6544	2224.21	67.1396	6.13699	1996.68	21.5712	6.57654	724.829	17.564	10.2673	1441.4
18.3788	13.5574	2625.33	17.3889	5.78078	455.563	34.9148	7.47496	1798.37	51.3995	3.22128	510.515	247.452	6.49054	9512.85	70.8517	12.4434	8559.46
56.1625	10.907	6025.61	265.861	13.3199	39521.1	8.95482	13.1788	1251.12	207.149	9.17333	18980.8	54.5723	8.28265	3676.36	23.4759	4.94979	633.806
38.4687	7.58946	1697.15	70.4172	9.56607	7930.67	144.883	16.4542	32503.5	27.3062	5.24094	635.722	158.791	8.29349	9162.8	28.7092	8.86983	1781.24
24.175	10.322	2000.29	38.0805	11.5064	4383.77	24.012	14.1932	3787.07	56.9439	8.97303	3590.55	58.3824	14.511	10118.7	14.1084	8.24247	749.758
88.8594	15.194	16338	16.8721	19.4491	5118.03	26.0249	8.28431	1425.54	78.145	5.73886	2154.02	77.5415	9.68866	6571.09	55.0616	12.4247	6871.49
106.189	9.83508	9044.42	45.1691	5.23557	1113.22	95.4446	13.6417	14459.9	33.1348	7.39995	1677.51	23.5815	5.81925	773.233	8.00463	9.84757	604.715
30.9021	15.7106	6207.11	62.7778	18.4265	16909.7	214.965	9.35139	16929.7	184.79	12.8608	24404.6	51.4138	3.24214	520.039	79.0586	9.77842	6014.57
32.3296	8.98224	2065.5	38.4623	12.0236	4456.31	18.3691	12.3295	2188.28	37.9449	2.3722	167.705	32.8927	7.40119	1610.61	71.3242	9.76541	5357.85
42.2785	14.2609	7209.29	22.6807	6.56887	755.363	37.8684	9.48042	2746.3	32.5434	7.41232	1410.21	34.0669	15.3022	6148.78	29.366	9.04594	1879.77
165.233	11.5948	18625.4	85.5239	9.8425	7178.81	127.669	13.9837	20440.3	7.74215	7.28341	303.686	63.3541	13.5225	9239.8	12.6049	8.5296	734.73
69.6414	13.8389	12444.7	35.3888	6.51485	1389.32	14.068	11.268	1407.47	35.4122	6.07341	1050.14	93.0148	11.6291	9958.46	14.9396	6.68885	529.126
43.807	10.7083	5064.87	47.4443	8.33429	2807.93	27.5883	10.8289	2416.48	8.09919	3.69007	74.2355	85.9643	7.33648	4816.7	10.3596	8.1438	525.222
82.1524	17.5695	21479.8	23.8633	12.3212	2991.84	46.0699	9.91126	3485.07	10.0432	3.16292	76.334	111.52	11.1607	10956.3	26.1872	10.3295	2220.06
164.06	18.8501	49683.3	46.8944	6.03239	1501.56	43.7299	15.7866	9323.84	6.70957	2.3722	29.6543	18.735	13.4995	2732.09	81.8897	8.57681	5185.55
68.5721	8.09721	4571.12	48.6313	5.93123	1421.12	28.3028	7.69863	1351.12	255.901	9.35796	18984.5	26.2136	6.28753	819.095	19.9578	10.1757	1670.33
15.2771	9.90564	1202.68	29.9687	20.4396	9839.77	110.898	16.4887	24143.3	252.247	11.4363	26477	23.9365	6.16231	683.882	70.0081	14.3582	11334.1
58.025	15.2861	12872.3	12.7795	19.7609	3922.86	177.929	9.37764	14984.7	34.3528	4.16419	593.455	81.9469	12.3897	10170.6	30.9035	10.5958	2720.05
36.8812	6.68154	1321.38	50.0576	8.88712	3212.37	310.827	14.1058	54133.9	27.4847	6.45359	880.109	19.3804	11.8986	2135.12	28.366	13.9615	4338.26
31.995	18.7908	8906.18	89.7728	8.51475	5171.58	32.9285	16.3474	6877.06	76.9085	8.91411	4917.51	12.9359	13.4029	1781.47	51.9117	12.6119	6417.45
89.1836	19.1559	26279.8	86.1847	6.43669	3466.85	122.912	5.85268	4378.54	80.7407	15.2157	14894.4	29.4309	7.88992	1499.04	19.2498	13.3725	2709.14
29.5537	8.93015	2136.1	51.973	5.95807	1444.68	38.2265	15.685	7304.6	51.2261	3.13329	445.779	49.6809	13.738	7327.27	23.796	12.2993	2954.09
105.353	6.94539	4276.6	92.4965	13.4629	13881.2	98.4455	4.3163	2025	38.962	15.8397	7893.22	31.329	11.5664	3266.32	45.9985	5.58467	1473.06
31.3872	5.54093	743.556	73.4983	13.0964	11502	22.2041	10.0028	1693.58	39.0409	13.7073	5904.86	32.3693	4.67774	664.933	8.74592	12.4385	1065.75
39.3269	20.9758	13892.7	76.0924	7.74261	4562.2	12.0922	12.9684	1574.25	143.159	8.09736	8142.77	74.74	6.87432	3173.99	29.3753	14.9261	5841.2
55.8698	16.384	12695.6	40.8056	6.30925	2519.42	24.3702	5.95446	753.845	28.7996	7.39011	1229.34	65.1343	6.05466	2316.51	6.66498	4.7575	109.379
56.4477	10.9577	5369.06	101.851	10.2813	8784.49	64.8765	11.6957	7708.98	56.803	7.08564	2653.66	44.1676	5.73885	1303.94	44.5535	9.50024	3307.18
92.2331	11.7252	15769	62.3719	6.79593	2522.35	28.6954	15.8546	5612.66	31.0509	9.39579	2098.58	51.1649	7.5793	2275.09	31.568	15.6219	6047.69
48.4878	15.2443	9193.7	41.8685	8.00531	2403.7	12.1443	13.6461	1748.41	29.8199	8.75103	1807.25	40.3529	10.2921	3325.67	35.1621	11.1935	3487.62
56.5195	11.0426	5968.39	82.5107	12.1205	11037.3	31.0289	7.69934	1652.29	62.4548	8.48435	3733.94	108.407	5.83438	3640.57	40.0832	3.82144	489.014
30.8271	20.0969	9553.72	73.6096	7.74621	5052.88	41.2304	12.0262	5065.45	16.8018	11.5796	1730.53	62.4418	5.43744	2823.97	12.5533	5.75988	324.178
67.0346	6.10986	2509.5	21.1193	13.1923	2906.8	22.7398	7.25636	979.388	23.3905	7.97638	1117.44	25.8942	6.11108	748.953	25.2038	7.21462	1067.99
56.2053	22.0909	21452	40.0098	16.8118	8912.78	59.6641	13.2153	8302.57	29.0058	17.6343	7063.09	44.2327	10.1091	3582.71	78.6265	4.32514	1482.84
43.0095	24.7757	20843.5	109.042	15.897	23298.3	50.8518	10.223	4673.15	104.743	8.13738	5491.13	24.6162	9.90051	2010.87	59.2975	9.71293	4596.12
81.6412	8.21961	6761.71	18.4503	9.40486	1298.4	26.9236	4.23992	448.12	53.5423	12.9183	7272.65	37.8506	14.8977	6682.73	9.75607	8.72042	580.762
77.8935	12.2819	10220.8	69.3968	12.2379	8696.14	27.8234	13.7344	4078.73	18.3972	10.3096	1476.35	47.6767	9.18753	3167.45	6.80075	4.7595	127.639
57.8784	26.1714	31254.3	116.623	14.7924	20660.1	26.4678	14.1073	4106.64	20.8896	11.459	2142.63	54.9601	12.0671	7551.38	46.9903	3.33053	470.955
28.2125	16.0662	5926.16	48.0006	5.56595	1189.17	28.3119	10.5312	2530.75	66.72	11.9325	7462.64	52.7272	12.7084	7627.55	18.9999	14.3447	3550.42
13.763	8.57862	788.003	48.8411	11.267	4808.85	93.0995	8.96597	6846.88	39.2802	6.12086	1419.45	76.2768	7.78757	3946.73	55.9651	6.54184	2679.36
28.992	11.9251	3185.37	16.1466	17.063	3598.25	75.2831	15.9238	15257.9	54.2002	10.2971	4511.76	6.70966	11.0702	645.808	57.3234	2.49498	327.709
46.1432	10.0893	4547.95	19.042	10.9703	1757.17	19.8231	7.0003	1025.55	32.1489	9.12226	2062.39	32.6039	10.9533	3066.88	20.1186	8.82373	1223.47
59.0965	15.5103	14609	52.5137	8.58108	3342.71	13.8075	3.16292	91.031	53.082	14.4711	8657.87	26.3753	10.3905	2271.67	9.81081	6.4974	340.459
9.114	9.17996	589.707	18.6299	6.65301	654.458	22.6002	4.51204	358.77	53.1978	13.6637	7978.64	22.3556	10.3632	1907.07	46.3923	6.81323	2985.73
13.9111	8.992	896.218	39.914	7.89927	2777.16	47.7577	14.7075	8082.66	39.2545	12.4944	4775.25	29.8665	15.075	5278.62	22.517	6.28901	805.578
9.77992	7.83318	468.337	23.5059	14.0931	3658.17	23.271	7.6736	1091.45	37.376	7.40979	2000.92	20.7095	15.8293	4112.98	5.19675	9.66172	375.016
33.2452	5.73066	865.955	109.831	10.0255	9532.7	27.084	8.03785	1418.62	16.6763	15.4849	3150.28	52.6801	15.3021	10443.5	31.1081	4.20628	471.352
37.0989	13.4877	5377.88	13.3471	7.62935	558.861	14.6742	3.69093	160.364	41.385	16.8736	9196.81	15.8621	16.4852	3817.65	29.071	7.99903	1466.15
25.7476	4.61924	418.116	47.7047	16.8329	10703.8	25.0214	13.2383	3394.19	43.657	3.69812	601.306	63.6529	17.3867	15276.2	33.4631	6.81436	1280
53.9737	9.21428	4783.83	51.2718	15.7731	10017	48.0118	10.4926	4172.38	23.2999	7.40461	1450.87	16.6687	8.18401	838.711	16.5574	4.2578	270.343
77.7597	19.755	24529.9	24.6389	19.3508	7159.57	23.7236	7.46161	1078.76	19.7827	4.78188	448.844	37.1937	10.9759	3707.49	43.3103	6.86688	1640.94
39.7512	19.1	11113.1	36.0817	5.02387	1118.09	31.6893	6.98367	1399.15	24.2534	7.7068	1285.63	166.951	12.2766	19929.2	19.2256	7.99231	962.202
37.663	5.75408	1028.83	21.3568	9.8454	1698.22	26.6503	12.76	3315.31	7.11664	8.43445	433.355	40.0027	9.34501	3466.24	10.2778	6.57208	357.439
54.8113	8.56847	3230.88	34.9401	9.9591	2868.23	29.1223	12.2875	3399.61	37.4684	12.6318	5359.84	62.7319	10.9397	6206.18	77.2786	3.50583	773.95
16.7926	8.00123	816.169	31.3133	7.17484	1426.51	27.8246	7.76776	1349.36	45.7213	9.25618	4662.74	18.7875	11.1181	1858.55	27.7084	4.93369	536.282
54.6488	21.7464	20517.2	21.5142	20.7105	7674.68	34.2948	3.70245	402.965	72.9273	17.6201	17944	79.1302	8.53434	4530.44	64.0243	3.59037	757.705
34.7501	32.9623	29612.6	32.3077	19.6212	10120.1	16.4983	6.37199	535.153	26.2199	11.2014	2511.19	92.3287	10.2361	8806.33	132.865	9.49374	10234.6
20.6261	22.3757	8092.22	185.239	14.074	32621.3	37.5322	14.7943	5965.9	80.5731	7.73997	4513.6	71.5937	11.0933	8277.54	10.1966	19.1498	2918.38
27.6487	3.26859	273.357	36.5311	14.4365	5986.03	44.9696	3.94002	674.476	26.6038	16.2685	5486.76	41.0902	7.13293	2695.03	20.3356	10.1357	1571.3
81.3138	19.5879	25588	143.96	24.0548	68012.9	19.4496	4.22963	260.339	68.0178	8.15892	5213.97	27.7524	12.0091	3141.45	43.2538	5.76741	1145.02
47.3103	15.4441	10246.6	57.976	13.1612	7809.9	46.6017	7.06269	2746.61	12.0175	12.4541	1447.75	17.2521	6.39416	647.149	36.088	6.6314	1264.44
19.1455	23.0606	8267.68	38.7423	12.4595	4858.95	31.7328	14.8795	5551.31	14.1582	13.6403	2112.61	7.96692	2.3722	35.2114	7.59188	7.81579	362.706
56.2994	16.1523	12185.5	75.0441	10.5632	7016.33	43.1778	12.7371	5393.28	69.0953	6.0708	2342.28	198.827	3.97734	2923.32	12.0262	7.36469	513.782
12.2759	21.0008	4153.86	7.7082	12.1246	898.539	28.9654	8.88218	1811.74	46.8335	11.8669	5280.4	38.5613	10.3424	3238.88	25.3155	3.70246	309.92
71.7532	15.4116	14094.3	37.1116	29.9488	26215.1	29.7511	8.12637	1879.2	42.626	3.652	618.853	40.9061	9.12367	2842.66	11.3313	17.79	2779.25
14.211	17.0208	3346.92	51.3642	21.1435	23867.2	28.6472	14.6015	4780.1	25.199	6.09603	740.693	28.0084	5.79276	803.481	22.1358	2.70347	185.934
23.1166	23.336	9768.08	34.5053	15.3776	6565.27	27.7301	12.8038	3903.31	8.24879	4.78145	169.167	19.2028	9.28992	1280.32	19.5389	2.32785	86.5286
34.3148	24.969	17058.3	26.4249	6.68529	1101.73	38.7405	18.2594	9890.15	19.1963	7.10784	789.266	45.064	7.40594	2124.28	10.1528	18.4688	2712.03
18.9461	35.2099	18344.7	15.7521	14.5525	2635.8	26.1636	20.0799	8514.84	28.8087	14.0097	4555.04	13.2561	9.22521	798.09	56.7107	4.13964	1219.92
46.3974	5.28547	1200.41	426.153	11.9581	49702.4	89.7308	15.4708	17165.3	20.0147	2.3722	88.4588	48.8258	6.29859	1858.94	54.3521	16.258	11260.8
47.1795	8.57479	4028.72	24.7434	3.60145	305.519	33.3951	7.80268	1759.83	13.0605	5.00788	275.064	21.7566	7.2109	897.627	13.9316	1.1861	15.3933
241.938	23.1613	107802	52.1784	15.2779	9605.13	129.877	13.5824	19413.2	48.7376	4.70959	980.626	15.4762	14.489	2760.21	8.36679	1.22154	9.87103
23.2719	34.9119	21897.2	52.3079	16.2801	11073.7	43.2928	18.2786	11780.8	14.0177	3.16292	111.593	37.0912	10.7354	3352.94	52.3199	7.89185	2624.47
19.7392	34.1648	18112.7	19.0776	22.1835	7186.88	19.8959	7.2091	803.506	23.7677	3.58055	271.364	31.9766	12.3675	3965.32	10.452	15.7851	2033.42
56.7931	29.6907	40829.8	44.0179	21.0285	15851	77.2167	20.4554	25199.9	158.653	9.4366	13031.7	33.468	12.2923	4006.13	24.7964	10.1908	2321.24
44.563	9.79998	4921.16	46.8229	17.9053	13260.9	23.1032	16.1616	4776.16	66.3573	15.0933	11803.6	48.3757	6.75713	1893.26	38.2855	4.783	882.678
62.9854	11.3998	8902.88	13.6395	28.7197	8719.01	29.6026	19.9107	9095.19	40.917	14.4826	6583.09	65.0981	6.62243	2377.05	51.6235	5.24038	1873.17
26.228	11.621	2743.83	19.9126	25.3829	9964.27	29.0071	8.68971	1680.8	96.8165	6.90323	3964.81	10.7708	12.5259	1309.73	53.9422	6.89165	2721.57
41.376	8.5612	4146.95	46.4826	6.80843	1797.19	23.873	7.18898	1147.5	19.58	6.91931	748.258	15.4504	17.409	3676.17	31.6688	9.18624	2337.25
31.5607	8.61017	1766.25	42.7664	25.3772	21503.1	122.689	13.3252	18631.8	14.0003	6.66149	495.364	31.911	13.8206	4882.41	43.2504	8.58079	2780.59
59.9488	25.4212	31024	88.6232	13.0815	15060	15.2036	6.43472	475.189	17.6485	6.26919	543.135	28.0196	12.9188	3839.6	88.4089	11.755	11291.9
35.6159	28.0247	22359.8	14.5621	14.5251	2415.14	31.178	4.42962	609.324	14.1737	6.50649	473.845	12.4222	13.6834	1861.45	45.9117	11.5048	5127.47
105.475	22.5635	42461	21.8943	16.9885	4965.19	14.8477	23.8062	6524.82	39.9137	16.1116	8157.08	53.4608	8.00266	2851.29	7.73334	8.74406	460.677
10.2382	23.9691	4647.84	85.7707	16.1765	19148.4	46.8164	11.1994	4977.31	67.2978	10.692	7235.58	25.0149	7.97452	1243.8	6.17764	8.62152	359.192
47.6389	15.8257	11502	7.70829	26.3575	4265.96	47.1077	5.71942	1256.39	29.8038	5.83678	769.287	87.6794	11.6364	9717.31	70.424	7.64504	3235.94
14.7269	26.0479	7998.77	62.7642	7.74286	5369.36	8.70697	25.3033	4384.06	44.8682	3.63522	554.435	65.3637	12.7627	8927.44	46.8508	12.482	5502.22
72.2578	17.9756	19727	52.9405	15.2587	9790.11	70.5543	7.34962	3597.33	138.059	7.52356	6327.35	20.8225	15.3734	4074.16	3.35479	16.3418	709.506
64.0808	20.2397	20701.4	64.1599	12.043	7608.7	43.8759	11.7201	4859.85	31.736	7.69405	1465.42	61.7164	11.2482	6442.09	62.8264	8.99392	4337.4
46.2417	15.036	8419.2	131.838	9.74716	11139.7	63.0987	22.49	24959.5	42.8033	15.9486	8508.77	67.341	8.46204	4112.78	42.9445	9.41495	2973.78
67.8552	21.3209	24227.6	62.0212	9.87768	5318.24	46.5036	3.37502	466.581	15.2434	14.5495	2508.12	54.8569	9.94732	4190.08	30.4727	13.8134	4492.66
49.1503	24.4645	23245.8	16.2889	22.9838	6681.1	52.2435	12.1772	7927.55	25.867	14.4113	4175.17	75.1248	6.83835	3424.5	5.8615	5.37732	130.656
113.918	12.842	16570.5	25.48	15.7878	4895.92	23.7127	16.0062	4746.39	7.80744	11.8115	848.395	39.5177	7.26432	1656.26	15.3287	5.27033	330.224
44.6639	6.20223	1450.83	18.0935	8.61986	1283.5	48.617	6.93412	2312.61	45.9714	11.7117	4881.4	53.6146	6.08833	1633.83	23.1054	5.37586	522.645
13.5291	22.017	5503.4	31.7236	15.8519	6182.95	17.3567	12.9858	2331.62	65.1148	6.02375	2074.9	27.8352	15.141	5032.07	6.74818	5.297	145.129
34.9069	9.56123	3792.73	88.6622	13.8554	13436.4	89.6539	7.92112	5435.74	61.5247	5.17335	1373.66	63.5335	8.40223	4362.29	35.378	4.49211	569.247
28.4078	10.6838	2527.06	40.2909	10.7028	5361.52	10.3397	19.5046	3069.69	60.0071	9.85605	5370.54	31.5735	11.0752	3565.62	32.5987	6.87979	1249.55
7.70821	25.3033	3876.14	176.821	14.2604	29022.1	26.2889	22.3827	10330.4	162.979	5.67175	4811.5	69.9903	12.2115	8982.34	23.2828	9.59515	1807.12
16.1132	21.8481	5849.84	70.1179	12.4071	8448.23	43.4285	6.32519	1766.43	166.079	7.00168	9613.38	14.3889	5.0271	280.152	40.177	5.88503	1101.78
54.1986	23.4835	24622.7	107.086	7.20397	5973.78	35.2662	12.4962	4322.93	28.2997	13.9945	4490.87	35.7339	6.47901	1399.34	23.6492	3.70259	254.452
98.5241	9.74471	7482.23	5.23215	2.3722	23.1245	13.0222	18.8121	3575.99	68.5956	8.51428	4164.33	68.1072	6.11709	2063.73	43.7443	10.6505	3955.13
67.85	24.4382	31835.7	6.79058	2.3722	30.0123	44.2076	21.4945	16216.5	40.3903	12.6921	5761.82	143.96	5.61437	4265.73	8.05384	4.82668	139.453
42.3468	22.5123	16922.1	27.4335	9.80762	2241.86	185.314	14.0781	28876.2	42.6944	8.63557	2556.01	15.5917	14.1082	2492.53	42.371	6.43228	1390.43
43.2138	22.88	17975.6	45.8713	17.1587	12117.8	68.5742	19.1687	19679	21.3809	7.17323	898.549	33.9908	11.913	3954.84	18.0282	5.493	425.2
54.7017	17.2432	13819.1	87.7025	17.9358	22774.1	40.7849	14.8558	7107.99	91.0847	7.17339	5439.32	17.8791	8.78983	1111.88	16.7265	7.74974	782.657
49.2906	14.4007	8432.87	64.0088	20.8503	21901	64.3586	10.8047	7177.5	23.135	6.01406	779.088	14.6881	3.68472	185.92	6.05256	8.01755	307.416
30.6354	9.09349	1972.48	84.1055	14.5662	14084.4	16.1704	17.3961	3497.01	26.7885	6.89527	1148.43	30.0941	3.22938	288.583	10.4314	5.56139	246.663
21.7676	9.09337	1372.51	24.608	16.6413	5422.4	15.2222	21.2163	5420.56	61.9903	7.59348	3724.08	12.7561	12.4541	1576.8	9.63018	13.9693	1465.24
20.4117	12.7684	2556.84	42.93	15.9693	8568.47	41.4184	16.3578	8711.09	30.4262	18.7723	8448.75	25.2485	11.6572	2600.63	21.2396	9.29727	1472.93
37.4238	8.88617	2446.25	26.1387	20.1593	8441.98	56.222	19.8947	17329.5	33.4992	11.9697	3921	45.1572	7.35213	2326.45	33.5539	13.9768	5688.45
163.98	11.8616	21200.7	21.0475	16.2525	4297.57	26.4896	17.5944	6420.81	51.913	14.473	8744.74	13.1691	8.99402	839.333	125.359	4.91856	2490.09
34.4272	15.1079	7204.83	52.508	10.6004	4955.57	23.1996	10.9131	2306.29	50.8015	14.8425	8886.35	61.8526	6.85034	2324.11	33.2145	6.86391	1217.15
40.3932	12.548	5082.61	13.6678	2.3722	60.4077	27.3946	17.8647	6968.51	32.3004	11.3292	3182.54	51.0015	3.97231	817.27	18.1476	6.26914	555.366
74.5673	6.7917	4244.93	31.3994	5.40327	931.316	24.013	8.49131	1389.65	17.4594	17.1948	4037.52	40.6986	6.35943	1383.94	6.74827	5.47419	157.964
46.9107	26.7305	26468.6	60.2095	11.3138	6246.51	38.5715	15.8662	7747.05	41.9549	8.54941	2701.45	20.738	7.9356	1010.37	20.0602	9.0447	1320
14.3167	22.2934	5714.3	23.4674	3.24316	217.987	55.685	7.28788	3684.87	10.3399	18.4502	2787.47	7.99108	10.0159	664.496	38.0005	13.3554	5468.46
170.341	13.2326	26830.7	107.316	12.3822	12799.1	56.9286	11.74	6251.77	14.6104	5.4562	381.217	19.7359	7.64331	883.55	18.1874	8.84822	1098.93
17.4705	22.2635	6737.62	44.4992	13.9795	6688.24	22.5308	11.2464	2166.31	56.4504	6.93035	3065.96	12.5304	13.706	1977.38	18.2921	5.28015	396.128
7.3009	24.7762	3558.99	27.3434	2.3722	120.85	74.6794	4.83178	1902.17	27.4633	6.78534	1003.8	32.9246	8.88112	2122.51	48.7462	12.8585	7399.08
32.2211	15.2434	6026.95	39.5807	7.42963	2405.21	53.2365	10.2907	4964.61	31.2389	5.2749	742.34	52.0489	5.41414	1392.3	7.28398	7.8671	352.77
124.059	13.6592	26975.7	48.4517	10.4522	4459.72	122.773	9.61637	9690.54	29.1553	6.71517	1055.57	27.2334	9.70935	2025.34	11.3606	7.12162	442.808
67.0612	18.4456	18137.1	19.8287	6.98404	779.989	55.6405	6.14812	1808.3	18.2978	7.31198	765.067	39.9475	7.8647	1969.47	26.3655	3.75581	533.348
16.8618	25.936	8942.38	38.677	6.41797	1444.36	18.9041	7.66969	881.012	5.72719	18.9775	1646.88	19.8051	4.36376	304.467	14.3633	10.951	1352.82
11.6543	29.5206	7903.69	116.575	11.1865	11722.8	20.9802	6.11597	632.896	55.621	12.0854	6402.93	34.7347	7.18006	1704.49	69.0072	7.33713	3168.11
85.2166	17.1977	20690.5	71.2745	4.09258	1080.55	37.0246	17.3493	8703.55	79.8986	6.37265	3782.29	37.8088	5.83868	1537.53	14.8309	5.45746	344.699
11.3394	20.0318	3925.98	35.4612	14.6086	5840.85	46.1316	10.0887	3646.01	48.4104	16.2413	9871.09	31.2676	3.57469	337.08	25.2929	11.3916	2615.33
60.1354	12.9668	7938.79	24.8043	4.21366	344.158	12.0176	12.3057	1468.04	14.2099	5.14342	340.603	27.9059	3.54262	302.873	19.8314	8.50389	1225.47
50.3144	8.82433	4323.34	36.2674	6.06488	1075.55	56.4254	6.18452	1822.41	26.432	5.0242	593.828	32.9823	8.07355	1705.85	11.4599	5.81639	302.615
35.7297	22.1834	14305.4	45.1621	13.2289	6157.05	9.49044	13.9861	1493.3	58.5909	3.8745	780.275	145.273	11.7528	16003.7	6.24893	5.67848	157.205
35.8341	8.52567	2116.13	79.8338	11.6793	8775.71	112.169	13.7062	16652.5	12.0176	4.7444	241.105	33.682	11.1481	3268.61	9.76976	6.83902	367.82
42.2805	8.82641	2805.13	19.927	12.6496	2497.88	32.7802	13.0591	4383.57	44.7138	7.40131	2369.57	98.5002	3.10497	831.921	10.9188	6.48494	362.129
23.5791	26.9852	13531.6	101.192	11.8785	11839.6	31.5674	16.3873	6705.16	48.7274	7.74512	2404.7	20.4659	5.54392	486.326	18.5328	5.43461	447.114
96.4292	13.0073	13667.2	30.5708	10.8529	2814.44	27.9147	13.1449	3934.61	35.57	4.31882	552.743	336.814	8.87712	22055.6	7.02933	6.67179	244.97
68.4672	24.425	32557.9	150.683	11.4554	15659.9	15.0262	4.86184	305.529	42.1601	14.8735	7829.55	28.644	5.25657	791.441	10.2093	6.6015	349.327
43.3981	15.5909	8972.66	120.439	8.61773	8161.27	10.4851	6.6193	350.177	18.032	13.5093	2601	12.3553	11.421	1257.34	17.5878	5.94894	482.424
49.9911	22.9596	21103.5	21.9887	22.8001	8927.62	11.0385	6.14049	319.833	67.4588	6.39441	2174.2	20.2449	7.24014	852.359	45.4386	6.18097	1566.07
27.4391	29.7845	19304.9	17.3096	16.573	3729.57	48.6924	4.93307	1120.03	36.7321	6.74259	1559.35	51.7166	10.536	4636.35	88.5877	5.57241	2395.51
9.23146	12.627	1165.6	57.1209	11.2159	5883.75	80.2009	17.0439	18325.7	25.8939	4.21202	379.69	43.4645	4.80036	1062.64	35.6115	4.26347	623.804
48.3374	20.33	15729.3	76.5553	13.7088	11574.6	275.261	14.0255	43705.1	40.6781	3.43085	386.65	55.3206	9.92042	4235.52	14.7302	5.50859	345.133
39.7046	6.03944	1540.85	75.2882	10.783	7091.13	33.4642	2.70167	207.711	26.6414	3.70096	324.78	20.7763	3.48836	214.688	20.3161	8.39405	1136.01
12.0765	5.31585	285.179	22.1096	12.0074	2568.68	65.475	18.0173	16928.4	47.9582	3.57097	580.413	181.246	9.46146	13739	31.2091	9.06028	1987.67
111.211	13.0826	19002.5	12.03	11.5974	1266.95	31.0554	4.3113	566.87	21.0012	2.3722	92.8191	22.643	4.95917	586.893	6.61422	6.77548	232.528
64.3566	11.2762	7506.64	121.478	10.5881	14817.4	81.4776	11.4307	9150.08	52.3357	13.978	6418.25	19.3665	3.97696	231.475	19.6251	5.38867	450.963
15.0656	4.75596	251.065	87.9348	18.0798	23973.1	24.7791	20.7979	8444.8	35.0762	11.6028	3702.86	81.7542	4.358	1412.96	7.40167	6.07173	209.167
35.0354	20.0709	10913.2	366.308	12.1922	46820.1	45.8396	16.4647	10509.2	100.607	12.04	11805.8	22.324	6.56055	768.799	16.3515	5.33164	351.39
8.00394	26.8849	4543.7	47.5453	9.37224	3908.98	25.1802	5.11297	535.147	37.7413	5.20668	921.052	163.669	8.91042	10696.9	16.4887	8.08013	854.744
56.245	19.923	17422.5	151.537	15.4136	30039.4	98.5363	11.1361	10406.6	31.3437	8.0122	1617.47	79.7862	9.31725	6109.61	287.808	5.16003	6865.43
17.9457	4.20621	245.971	42.7095	19.3432	13420.3	13.8889	8.35933	764.43	26.0182	4.00133	333.25	40.2251	10.2304	3428.3	26.968	5.77338	704.858
23.0179	24.9839	11319.1	68.1585	7.61562	3358.2	31.717	5.13329	932.245	87.7119	14.1627	13761.4	150.425	9.28382	10908.6	9.24637	5.53513	222.494
45.2767	24.4452	21674	118.514	7.03748	5411.44	11.0791	11.5974	1225.97	24.1448	13.7397	3532.35	16.2937	6.79365	609.411	10.3426	4.96114	204.1
51.2788	18.5506	14071.9				43.0405	13.8915	7255	17.8852	2.44554	86.2995	37.8405	5.91681	1455.14	17.0195	10.8581	1573.86
66.1763	14.9111	12053.5				81.489	12.343	10608.7	55.5916	6.21611	2138.45	38.5448	4.69513	762.037	85.5119	4.25701	1373.02
34.0147	25.2117	16988.6				80.0634	16.6184	17535.5	60.3353	7.7129	3418.46	18.2072	6.79765	665.099	14.4801	6.14335	435.796
37.3587	23.4671	16430.8				34.6988	7.86939	1716.93	21.991	9.56282	1553.37	27.1371	7.36827	1345.34	5.29367	5.73281	135.819
52.1973	9.45688	5791.76				23.7492	16.5323	5168.6	25.3686	5.64465	633.616	18.0272	8.18695	945.145	4.32967	5.00795	87.6852
21.742	7.74531	974.152				18.5893	20.7917	6320.69	80.0678	3.5085	952.581	34.8862	9.07561	2353.56	4.3297	5.00795	87.6863
43.6123	7.20519	1857.21				29.1075	19.4099	8553.12	10.2383	14.4555	1604.22	12.0964	10.9356	1197.97	17.8185	5.26006	387.418
19.6066	22.862	7759.71				46.8008	10.8362	4903.94	8.20869	16.4076	1735.69	37.5391	7.41761	1643.2	28.717	5.39598	650.89
36.8292	10.4928	3370.76				39.1236	8.52443	3003.86	28.8043	5.23794	609.617	21.862	11.3217	2318.83	25.7605	4.49561	447.026
39.7509	19.3694	11714.6				60.9555	5.83003	1767.32	92.5652	10.9661	8920.16	17.4105	4.12773	266.848	14.0104	3.35779	120.75
141.512	23.9499	63937.8				14.2043	4.62692	218.476	41.544	6.2221	1946.45	57.0395	5.18973	1227.35	38.8818	5.1612	908.871
42.2891	12.3804	4960.98				50.7897	7.84192	3400.99	88.1096	6.37593	3638.3	65.4733	4.60732	1238.23	5.30065	11.6016	554.706
46.8078	20.1424	15750.5				11.0631	20.559	3672.56	24.1158	5.3432	567.843	28.2489	14.1459	4463.54	14.5575	10.9844	1365.97
59.9271	22.5013	24313.6				39.8839	15.3699	7688.93	34.2015	8.47513	3291.4	9.33918	15.8889	1854.15	10.63	13.1198	1439.27
57.298	15.8502	12187.3				20.2699	20.2778	6487.6	7.30087	2.3722	32.2676	40.6814	9.52322	3168.82	12.2892	6.41782	395.785
57.75	26.583	32453.6				138.816	11.692	16172.1	7.30071	2.3722	32.2669	62.1377	5.46479	1524.45	10.5343	5.62821	254.158
69.6549	6.16282	2414.16				103.407	9.75498	11097.4	21.2815	4.43196	465.596	46.7876	8.18553	2355.52	12.7598	5.19212	264.249
70.589	21.7153	25843.9				50.8938	14.5118	8243.52	28.1585	12.0657	3958.86	21.2388	6.75526	754.291	62.6429	7.5746	2992.21
97.409	10.2645	12140.8				17.4896	20.559	5805.93	45.4593	14.2855	7370.85	19.3603	4.32809	267.197	15.7321	10.8431	1420.98
22.9502	9.99328	1817.28				41.3514	20.4529	13575.6	16.9992	22.2157	6528.97	19.3209	9.68853	1419.54	68.0381	4.52807	1391.09
57.9777	15.1037	11341				73.7764	14.3092	12717.9	9.29778	21.9429	3490.94	16.3783	13.5484	2423.01	18.3712	10.4335	1580.4
61.9916	20.5528	21279.5				44.4375	6.31744	2084.36	18.9035	21.7355	7019.43	48.1888	8.02943	3052.93	84.9255	4.39257	1825.29
112.533	19.8835	35238.6				38.2089	11.9945	5359.81	84.4926	10.2672	7110.4	63.2554	8.67672	3786.98	24.6842	4.62852	397.703
30.5834	20.1316	10615.3				56.3788	9.49641	4107.54	11.5046	15.2973	2138.97	156.64	7.81167	8113.55	7.27722	5.75077	187.389
62.4927	18.1622	16115.5				17.8532	15.7702	3429.19	88.8976	10.7264	7978.88	35.6676	9.6396	2743.72	7.92168	5.32451	174.454
41.3958	23.9984	18749				24.1003	18.2861	6365.13	35.9794	5.53766	1249.31	89.3618	4.59989	1913.64	22.1081	8.30173	1207.44
10.7472	17.4865	2545.33				11.6141	20.0318	3674.83	89.4238	9.35802	7529.1	43.4419	8.88833	2798.48	16.2145	5.35819	363.608
18.2361	16.8015	3959.96				24.0323	17.518	5899.3	11.235	9.1921	864.406	69.6192	6.76769	3659.33	19.1311	4.67021	353.622
23.8212	15.7207	4520.84				23.3774	9.61815	1803.98	35.812	9.00087	2382.33	40.5214	14.6254	6739.78	9.41034	5.83896	246.491
17.8871	19.1814	5113.58				45.12	8.86416	2829.04	48.8125	3.71081	710.578	8.6197	13.1787	1224.69	36.3644	6.08972	1051.68
79.3547	10.9949	10575				30.1101	6.34011	983.817	45.2142	3.17545	382.285	25.9696	5.51803	631.071	11.2133	5.53513	269.823
32.1462	20.7205	11048.7				15.5337	19.6856	4712.49	26.2556	7.98565	1280.39	47.8118	4.77784	995.977	14.7516	8.48012	817.6
26.1403	7.03626	1441.49				51.543	9.10789	4125.73	29.5858	14.1001	4662.75	21.0584	2.3722	93.0718	147.727	9.64218	11098
57.6546	16.2886	11908.1				12.9415	19.5528	4022.07	16.315	19.3091	4805.27	11.6002	4.12542	167.399	8.66971	8.83325	515.245
28.2763	12.6858	3876.38				18.1669	3.52715	202.79	12.9177	19.4693	3946.39	11.9668	2.3722	52.8897	10.2427	8.44825	577.542
30.6618	7.37283	2415.84				63.8263	12.8516	9462.83	42.8688	7.85149	2335.4	43.1046	9.85142	3376.07	8.32192	8.721	488.787
29.5843	22.2691	11724.9				41.3543	15.9704	8116.71	12.5298	2.3722	55.3779	21.7708	11.6213	2270.84	35.6273	4.4532	564.559
20.278	10.2969	1794.06				32.5793	13.8525	4910.23	104.176	11.539	10768.1	22.886	2.8115	142.414	34.2517	5.94751	952.011
12.07	2.3722	53.3457				64.7113	18.598	18079	28.9114	5.74312	914.629	89.779	4.01924	1277.8	32.0878	8.38435	1782.7
36.1714	7.07354	1546.55				17.843	3.95978	244.784	10.2384	15.2215	1830.95	332.572	5.88852	10220.4	16.1568	8.15205	852.958
42.4889	20.1635	13366.6				55.0984	9.48857	4654.81	117.098	14.2243	20785.6	22.1146	3.02816	160.473	13.0181	7.9075	643.061
23.717	27.0562	13644.2				13.6197	15.3089	2528.67	34.9705	3.68077	459.38	31.7732	5.05692	658.246	87.4482	7.31608	4192.88
7.00517	21.0862	2508.96				20.6126	10.9077	2055.04	62.3742	14.7163	10906	60.1797	3.02937	946.257	54.543	2.79155	384.785
45.72	19.4716	14105.4				115.875	14.7729	21271.9	42.3863	7.05581	1883.46	44.2787	16.857	8428.3	18.4429	4.9857	368.288
31.4334	20.2717	10759.8				51.5421	20.7048	17290.7	49.4465	10.1174	4080.01	17.026	3.16293	120.177	14.1179	3.53266	129.124
51.3118	21.5523	18802				41.7556	5.26966	946.24	151.536	14.4057	24483.1	21.5333	3.19896	204.195	5.9445	5.53513	143.041
17.8323	18.6163	4812.2				44.7997	12.7478	6198.56	55.9674	5.32615	2013.85	56.8434	10.4939	5156.35	16.7985	3.81144	184.278
55.5295	8.75019	4303.52				41.5858	10.7648	3352.99	40.7134	13.3058	5625.17	84.1528	6.13325	4353.1	15.568	10.4159	1343.63
72.0259	14.9795	13189.7				38.9342	5.06985	848.505	52.4852	7.36187	2411.3	19.9108	9.5689	1326.22	42.0777	10.6476	3919.42
19.3773	16.5186	4042.91				14.6808	4.47561	181.67	65.4814	16.0987	13405.7	48.9927	8.17545	2598.99	32.0714	11.5989	3411.99
56.2677	15.4804	10712.8				19.7649	5.05544	399.607	52.8971	11.3737	5815.5	50.0417	5.16913	1194.9	46.3153	10.8954	4338.2
88.1753	26.7151	50193.2				60.517	9.23076	4175.43	65.7949	8.10156	3557.47	16.7056	6.37413	533.586	10.6353	7.049	410.714
11.2451	29.0394	7386.21				21.6792	11.49	2243.97	53.4905	8.04118	4191.92	30.3292	9.56857	2244.72	52.2403	9.21903	3406.07
41.191	25.7235	21416.6				181.069	9.2817	13429.8	53.5076	6.90124	2570.92	68.1874	12.0403	9030.15	12.4017	5.29628	268.442
16.881	15.8082	3691.4				60.7219	5.27066	1736.36	89.9197	14.84	15803.1	14.7258	10.8777	1402.2	10.3412	4.56869	175.401
15.7391	28.0024	9641.53				8.70704	9.48869	672.714	32.9475	4.71521	922.774	48.8125	6.39129	1582.8	20.2127	6.40967	641.058
59.9305	26.0111	32132.5				25.5369	4.12933	418.505	75.1011	9.53111	6503.44	29.6018	6.46254	1245.93	23.0167	6.68457	846.976
154.277	18.4635	44203.3				310.359	9.56132	25039.2	13.3959	10.5879	1186.77	27.5816	7.08018	1094.3	72.7684	9.76536	5698.39
59.0132	23.0995	25513.3				49.8504	12.9005	6507.17	36.4664	4.53976	707.172	138.794	5.89859	4122.66	9.66976	6.19196	288.141
19.7266	19.3698	5738.13				32.4539	15.1621	5933.41	37.2109	7.52009	2005.52	31.966	11.7765	3535.61	10.4387	5.53513	251.184
61.6604	17.9246	15703.4				13.5584	11.0022	1269.22	25.4798	7.534	1133.49	48.3796	10.7835	4348	26.0473	5.55593	630.361
24.3562	18.7256	6831.02				12.0176	14.2331	1912.07	83.3425	7.02184	3815.92	40.8963	8.55905	2312.41	55.2575	4.87233	1101.98
12.9522	24.0573	5870.97				38.6885	6.94981	1384.72	26.2764	2.3722	116.133	39.0568	6.9511	1557.29	16.1046	5.59593	394.783
33.7741	23.7154	15058.9				21.3961	14.5511	3477.27	249.225	9.38805	19646.6	73.2739	12.12	8824.52	14.3286	9.63943	1058.28
56.1255	6.11915	2267.88				27.6036	8.74622	1717.27	50.0382	5.35911	1166.7	27.0397	11.4074	2723.49	62.378	7.69178	2894.61
94.1605	6.49189	3220.72				131.604	8.36048	8163.59	67.0652	8.05633	3431.88	20.4827	5.75662	556.477	36.175	4.90373	641.447
57.9049	6.29488	2164.15				26.7333	14.8045	4578.5	25.9235	6.1255	863.217	144.467	7.90535	9373.8	51.3034	4.74069	978.789
110.648	7.1761	4590.8				19.6425	8.38348	1042.47	17.5896	10.4088	1395.61	39.2996	6.76455	1605.62	90.8035	6.06696	2645.34
30.7497	12.6745	3963.5				103.898	6.91979	4575.53	28.7318	8.6491	1609.54	96.1972	8.08485	4975.59	18.3294	3.43467	170.658
105.31	9.16186	8896.93				43.8076	13.6971	7024.54	36.055	8.82149	2197.98	32.1092	10.7024	3067.64	8.85519	10.1942	715.198
38.4374	10.9571	3631.76				22.6322	4.17012	354.869	48.4854	11.0861	4731.46	8.58268	14.925	1497.94	23.4611	8.28701	1271.33
56.1526	17.781	14122.4				236.128	8.2483	15037.1	190.066	16.8533	38483.9	93.994	6.21316	3923.48	45.019	9.34705	3066.82
23.9692	19.9486	7432.14				22.7718	9.50199	1533.39	19.2288	7.0414	701.513	37.7382	12.0014	4501.59	19.284	4.40374	325.638
24.9648	7.59896	1140.29				36.1789	13.8411	5410.85	275.708	9.89807	23088.5	62.1576	7.83623	3069.64	39.0506	5.56367	948.796
62.1137	12.9626	9483.53				23.0298	8.08798	1446.62	36.1945	6.7385	1569.32	86.9729	12.2654	11570.7	27.2818	4.78848	551.793
112.283	20.5049	36493.4				45.1239	3.35049	473.816	13.1556	13.0469	1791.29	53.6676	16.427	11267.1	12.0517	9.40859	849.686
8.77355	24.2161	4001.9				16.9719	10.6187	1488.2	17.6397	2.3722	77.9621	33.6534	15.13	6275.41	38.2473	3.78252	564.626
9.1999	7.31426	393.802				209.541	10.6121	24958.3	20.5106	2.3722	90.6504	34.917	12.1188	4689.5	38.5489	2.57972	242.274
22.36	4.53465	436.812				32.5827	7.47534	1849.12	34.6002	9.17513	2231.66	136.232	5.08463	3091.74	39.1596	4.29347	659.98
30.6599	5.42207	742.759				26.7809	20.3946	8657.15	7.70822	12.6517	969.038	98.5297	6.97087	3917.51	13.9539	10.5067	1278.25
19.3664	3.69048	220.272				37.1604	10.3919	3422.65	148.794	16.631	27514.5	17.3562	12.7605	2192.34	65.8669	9.7489	4938.92
94.4191	8.61233	6491.52				133.743	9.04467	9373.31	15.5242	13.2177	2163.53	36.8	5.24479	871.745	17.588	6.48675	603.171
70.5638	3.92082	927.041				33.4224	2.8911	255.859	52.6405	6.49939	2102.42	32.3068	5.08191	806.561	26.4159	7.52195	1124.05
28.6941	4.28869	415.328				35.8898	15.0652	6657.09	44.5368	14.4196	7451.14	18.9777	14.7603	3199.67	17.9273	6.07034	550.136
13.5059	13.4548	1918.72				131.623	14.1985	21470.6	19.79	6.82546	729.7	97.2424	10.8643	9329.58	10.8887	4.47039	170.593
27.1691	17.9615	7097.01				28.429	12.9573	4111.19	49.7742	9.86687	3888.49	7.99111	17.9231	1973.98	48.701	2.79762	380.493
43.291	18.9671	12082.7				19.5882	14.1922	3097.45	36.3458	12.4537	4398.51	12.1035	16.6548	2655.07	42.8336	5.91868	1270.43
29.6831	17.8835	7539.5				20.6046	12.9096	2698.12	12.3225	15.3452	2372.65	23.4603	2.86642	162.848	23.8399	6.44792	794.159
54.212	8.18153	3668.39				36.2271	15.2247	6613.11	15.2405	6.22213	494.946	120.296	9.4811	8763.66	54.3352	4.92475	1024.26
18.2345	7.30409	890.855				48.4018	10.0708	4080.68	18.2236	9.20467	1199.16	40.7	6.31424	1315.78	25.5509	8.43343	1496.41
38.128	17.6561	9777				33.8479	9.27071	2143.1	11.0631	5.00793	279.995	36.8922	3.79403	877.269	4.32953	9.22513	301.987
50.1954	24.2601	23025.7				9.16197	13.603	1294.23	40.6867	4.46792	686.283	59.2604	6.76065	2299.76	9.02971	7.60309	445.665
26.4495	2.76753	157.358				62.8676	11.4757	7127.44	42.925	10.414	3740.37	109.477	4.24123	1954.09	37.2837	4.82278	672.621
19.2681	5.59452	519.437				12.3482	11.162	1284.59	14.607	8.45371	786.905	39.192	6.42564	1900.85	116.62	7.82767	6166.56
30.2373	6.82724	1080.56				18.5918	14.5697	3070.4	72.4471	4.62332	1427.9	14.4579	6.28111	514.118	38.7169	7.48403	1814.67
30.7175	4.45003	538.414				31.5518	7.86462	1746.14	72.584	8.94268	4648.22	23.7219	14.5207	3970.04	21.0881	3.65279	241.064
50.0978	8.09909	3505.3				13.9288	11.8658	1502.18	36.9463	4.82104	723.871	39.7631	13.8153	5984.62	24.8714	10.1677	1963.83
48.0239	4.93421	1035.98				68.4425	12.4973	8522.7	29.7702	17.7046	7224.15	60.1266	13.3991	8213.77	19.5626	4.5051	397.501
37.8177	7.47888	1937.78				50.9675	8.24424	2760.82	10.8379	16.8688	2409.59	47.0604	11.3082	3853.23	22.7129	3.83557	269.895
42.4047	6.50712	1568.48				8.00394	23.7219	3563.42	91.9329	7.68415	4823.09	22.8533	13.5243	3238.57	29.4431	6.34779	947.079
25.0725	3.98423	402.275				40.3984	15.3195	7746.42	103.971	5.17203	2353.04	54.3303	5.9919	1327.41	12.9582	6.4588	436.63
6.70966	13.706	1063.16				13.5555	13.6605	1965.92	37.4968	3.68838	546.31	46.609	10.2289	4034.42	121.396	4.05618	1860.56
33.7802	4.3495	487.061				22.158	13.4081	3103.09	38.247	5.47434	1029.39	12.5307	12.1244	1540.72	5.07515	8.08033	262.755
41.0578	22.9049	16945.8				28.539	11.0636	2748.05	11.349	13.1954	1530.05	24.8872	8.04355	1426.41	41.9283	5.68741	1099.01
16.0913	14.0988	2568.03				63.7743	10.2662	5403.38	33.8892	9.69772	2428.49	107.138	7.49005	4855.15	4.42828	12.6517	556.704
54.3534	18	13775.6				50.8334	8.04304	2570.01	22.0649	2.86641	142.235	49.7073	7.59234	2389.47	77.4904	8.76756	4624.75
17.4914	23.1735	7346.05				53.6255	12.9066	6905.29	16.9637	2.3722	74.9742	29.5258	4.71634	712.018	17.1136	7.82527	813.582
68.2351	12.639	11126.3				41.3145	10.223	4728.78	8.70716	20.0318	2782.14	30.9609	10.1655	2711.22	21	5.79857	637.111
42.324	19.0858	12359.3				8.00398	25.3034	4024.87	88.9541	8.5939	7001.63	13.3526	11.9018	1542.27	101.861	5.16673	2722.41
32.9603	13.0168	4517.12				10.7655	20.9684	3668.62	28.0195	5.84065	854.984	74.8529	6.2889	2799.01	127.292	8.76338	8415.91
20.4876	4.79915	390.555				109.581	6.69776	6441.09	10.3398	13.706	1543.24	63.2525	7.37417	3095.61	29.4421	4.30042	560.026
12.3762	7.47488	524.019				27.3652	11.6072	2927.37	39.6088	6.16872	1199.24	43.6254	14.6367	7084.88	18.4553	11.7009	1952.53
43.2842	20.9515	14836.2				53.4894	7.86209	2812.72	33.5391	18.6561	9157.56	56.9631	13.544	8387.44	45.8407	2.57454	277.418
28.6953	5.42989	748.413				23.1512	10.8894	2245.88	28.9685	7.56747	1324.06	26.986	7.52322	1179.52	21.0528	3.87206	361.703
34.5514	23.1869	14529.2				31.9034	8.27403	1948.42	26.4221	10.8072	2496.2	248.953	6.8678	9807.09	17.5665	4.40047	263.162
125.731	8.88206	11427.6				14.0337	13.3998	1973.74	11.8529	15.2162	2181.79	27.4374	8.01976	1430.53	34.7805	8.48066	2086.48
78.7059	4.95631	1932.76				36.123	6.24797	1287.3	57.8143	13.4114	8233.54	58.5897	3.93675	879.745	24.3877	3.90156	309.116
27.2732	4.0693	436.989				35.6981	13.2641	4889.64	22.6703	3.28435	198.102	31.5743	7.0145	1151.06	21.2656	8.65675	1263.37
49.433	10.6027	5179.29				93.4898	8.53514	7214.71	8.8693	6.32585	278.751	63.8995	7.30637	2727	13.58	7.04385	523.506
39.5576	8.65896	2848.96				11.0423	20.7073	3739.64	6.72576	5.00794	143.68	33.3205	3.98937	452.38	6.39643	8.31815	354.995
7.70822	23.1947	3310.11				76.5032	8.17448	5294.93	20.6813	2.3722	91.4053	27.5016	9.54668	1956.53	4.92766	7.09188	199.243
36.335	9.45185	3458.16				9.16195	12.9606	1224.21	53.2376	7.24224	2605.63	13.5607	10.9452	1228.45	66.6429	8.03977	3420.24
111.867	12.6214	15389.9				23.3373	12.7521	2937.88	98.5746	10.6917	8861.07	54.02	5.44054	1276.52	28.8103	7.57501	1304.42
55.2009	10.5052	6183.25				13.5207	8.96166	883.707	47.3614	5.88622	1602.19	15.2585	9.24445	1051.53	38.4315	5.7767	1036.71
24.6601	8.4159	1497.18				25.677	5.17824	649.644	11.5857	10.8202	1072.9	76.471	4.66327	1522.33	82.7595	8.20698	4537.94
24.1881	5.57876	736.133				102.155	11.9446	13280.3	30.1422	10.5629	2621.42	33.3204	4.46782	515.875	22.8662	6.61294	771.311
132.755	7.67715	6384.38				183.324	12.4083	22900.1	14.0679	13.3313	1941.25	29.7172	7.64245	1321.31	8.54182	8.93495	549.987
65.6781	3.62484	774.848				10.7041	9.58758	799.762	8.707	2.3722	38.4823	62.2328	7.98484	3800.4	85.3391	6.94625	3643.63
105.717	5.37383	2545.5				29.538	15.7488	5787.45	28.3436	6.05134	867.639	38.2413	11.7217	4455.65	25.8579	7.21743	1035.22
52.2172	7.15006	2175.84				12.3552	10.4956	1077.07	102.739	4.54683	2117.19	30.6995	5.67533	803.503	29.8869	5.31828	755.747
11.1506	3.8633	147.579				56.2894	4.40327	1002.87	37.9075	3.13393	314.603	84.334	9.25894	5768.05	54.753	11.1942	5361.91
5.7271	5.00783	127.817				7.70829	14.7603	1287.95	24.1111	10.8232	2319.62	30.087	5.58263	772.696	26.4602	10.7296	2394.57
28.0008	4.03895	367.737				233.451	11.4626	25891.5	22.9992	10.4975	2023.26	7.99108	5.00783	179.043	14.3885	4.17216	206.55
79.6465	14.7559	13692.7				74.4071	4.65901	1477.71	8.00401	21.6133	2983.56	63.3993	11.6079	6767.41	20.69	9.92322	1597.77
21.4261	6.28304	740.617				103.924	11.3576	12099.9	149.5	15.3606	28463.1	47.5897	11.1693	4669.95	4.91959	10.2795	408.287
17.4707	10.0835	1399.74				36.5622	15.2015	6792.56	200.407	12.0766	23777.7	41.2995	3.25515	395.973	14.0532	7.38195	601.672
84.7265	5.78834	2917.88				52.2941	12.4694	6389.04	131.825	12.1764	17196.7	7.96697	3.68999	80.8514	22.9883	5.47105	609.642
35.52	19.3347	10382				86.0603	6.52112	3012.11	26.8494	14.2191	4234.25	162.969	5.48718	4543.36	17.4089	9.78998	1348.76
48.6538	7.48621	2795.17				23.6865	4.70826	458.211	22.4978	8.08964	1187.72	31.8598	8.34652	1822.07	80.567	8.05526	4216.72
200.608	14.4761	35771.9				77.6865	6.45067	2536.22	53.4784	7.99616	2713.53	160.07	9.0585	11499.5	130.538	5.7416	4776.81
						51.925	8.17692	2802.67	14.9384	12.7725	1885.52	17.9376	2.3722	79.2785	21.4182	4.41525	356.491
						50.4643	6.64253	2456.73	30.1149	8.24545	1586.51	51.3448	4.20412	812.759	20.4568	4.53751	333.193
						55.6322	5.67124	1931.76	138.58	9.87326	11176.8	61.1033	7.97515	3145.56	31.5468	5.26599	690.834
						25.5025	8.0198	1416.32	33.4919	6.71311	1159.3	13.129	3.16289	94.3187	29.925	7.18185	1187.04
						111.728	7.18383	4838.22	43.2826	2.63578	241.572	201.714	12.2812	24272.9	25.2504	9.4669	1832.06
						19.8099	4.53267	320.119	83.1243	7.77491	4056.63	21.7575	17.4789	5342.47	113.154	5.29237	3063.63
						160.593	12.5849	20949.2	35.1861	8.46084	1969.45	26.1714	11.568	2739.87	52.1194	9.05755	3572.81
						10.3295	12.0586	1196.98	19.4767	9.53956	1344.91	15.2424	11.6665	1602.03	25.0698	10.6113	2260.44
						38.2275	10.897	3794.01	38.3376	13.4937	5481.86	67.7982	5.13162	1425.57	17.7583	8.01345	967.933
						89.0093	5.54245	2276.31	27.2093	8.78949	1674.57	86.2303	7.37317	3912.37	7.99084	8.91051	490.349
						22.4683	12.0938	2587.52	13.416	3.9894	189.029	92.2195	6.57133	4059.86	17.0384	9.63644	1276.16
						19.9566	12.282	2351.59	97.629	6.93605	4383.73	53.9651	6.4717	1711.13	11.8706	8.45426	683.028
						23.8985	5.45782	642.701	78.432	5.35422	1998.8	37.8627	5.1502	1102.72	16.9516	9.0101	1117.79
						16.7536	7.9995	846.608	54.1369	6.3457	1934.95	135.043	10.5376	12691.3	65.0211	8.48865	3628.03
						32.2555	12.0226	3611.04	59.1646	6.50054	2368.99	124.025	9.91219	9869.82	48.9767	12.2663	6178.94
						31.481	11.4478	3192.6	21.005	6.0313	573.888	12.2962	10.0158	972.919	2.86359	10.2795	237.653
						100.51	7.00079	5025.58	82.2704	9.1246	5321.69	49.1301	5.72348	1337.12	74.085	9.57257	5300.37
						66.5508	7.61101	3371.75	57.4538	4.66288	1069.59	39.2725	7.28638	1748.75	18.6178	3.67818	266.486
						57.0543	7.34396	2553.88	13.911	6.46206	440.041	52.0894	14.8491	8471.02	50.1647	8.1338	2624.98
						105.179	9.03586	7095.16	52.2325	6.04279	1501.79	7.00841	8.43452	417.592	152.052	6.87048	6777.7
						117.55	13.512	18215.9	77.9802	11.2348	8280.78	13.8712	11.7406	1516.92	48.8054	8.87145	3151.08
						76.6047	14.0169	12869.3	56.1685	7.06101	2344.04	27.541	3.33366	267.145	17.738	8.29804	968.983
						7.70829	8.96156	496.624	44.295	10.3221	4686.3	62.2428	11.8238	7086	22.7939	7.21467	942.72
						20.2724	3.98098	271.546	78.7145	6.83823	4334.83	134.441	6.92172	6385.03	32.5984	11.8917	3727.73
						30.4406	9.23909	2036.22	33.088	6.26616	1039.6	119.625	6.41397	4275.88	21.8159	3.47307	356.312
						16.0873	3.50778	171.503	15.4975	6.73208	571.704	48.6869	14.9052	8973.53	8.64371	10.9189	797.449
						9.65803	7.38001	385.73	20.9115	9.26019	1349.38	33.8407	7.77743	1603.09	11.6651	9.99836	888.688
						49.1026	8.15075	2611.52	37.2043	3.63195	412.251	44.2883	18.332	11790.1	18.3398	11.7904	1998.53
						34.7065	4.37731	781.031	54.321	8.47162	3117.54	19.3749	19.6248	5901.92	60.0277	4.679	1052.92
						18.7818	5.18734	370.518	23.6104	5.23027	491.359	45.8492	13.1514	5971.45	23.1775	7.7792	1207.93
						12.4653	4.33165	206.549	20.3866	3.85479	245.317	79.8759	10.9639	8515.24	6.28082	12.3018	758.297
						32.5825	6.62063	1281.4	151.507	17.9257	38950.2	31.5184	13.9075	5170.76	12.9216	14.1959	2078.65
						28.269	4.02771	391.784	19.6833	9.27225	1300.83	50.0085	10.2629	4192.23	43.7091	10.6289	3935.6
						52.2222	8.14969	2810.49	70.1436	5.84595	1864.89	14.3491	6.94212	542.314	8.34312	15.251	1528.01
						47.4305	9.50166	3376.29	96.5806	6.68104	3861.65	9.27838	8.42621	472.87	102.672	7.26222	4757.94
						71.4093	7.8295	3683.86	9.34111	18.9775	2710.34	21.0461	8.64926	1338.95	62.5342	9.675	4843.18
						139.461	12.9018	18632.2	27.8071	2.92338	197.409	25.2742	12.6397	3205.69	17.8661	11.1102	1759.87
						13.6515	11.2161	1283.33	121.273	5.09645	3183.34	20.0109	18.0171	5221.22	35.0084	4.5542	620.789
						63.2922	9.90355	5013.07	28.4952	8.97386	1961.73	18.8466	6.25127	561.444	21.7952	11.812	2398.41
						37.2047	12.9775	4958.7	56.9805	14.4822	9527.2	37.3218	6.76367	1615.94	90.8107	10.9305	9354.22
						24.8069	7.25775	1461.64	7.70829	7.90727	378.531	302.521	12.2082	36604.7	29.9461	10.6375	2629.05
						20.2718	2.86639	131.346	11.5259	7.80845	547.706	80.7473	5.23153	3036.48	15.3869	12.3663	1838.9
						10.34	2.3722	45.6998	15.0494	4.27256	193.124	24.8811	8.55928	1389.78	19.0312	9.96816	1538.18
						15.18	3.65524	170.606	37.9406	7.6872	1757.11	20.9629	9.25213	1382.41	52.9103	16.2039	10432.2
						8.70699	7.38019	387.673	10.3293	7.75908	467.835	23.6075	9.6281	1707.79	86.2984	13.7272	13070.5
						18.2588	10.6616	1597.54	11.0654	8.42934	568.826	37.0656	11.9026	4093.59	14.6645	6.55943	497.879
						99.6064	9.76881	7539.63	20.8461	11.4232	2037.98	45.8241	13.4553	6389.71	28.721	6.70006	1438.88
						53.6643	6.33931	1973.97	109.219	5.59538	3415.3	23.0864	11.2168	2229.69	49.2698	6.72214	2444.42
						18.1718	3.54903	210.433	12.8849	6.31229	402.728	82.9514	3.96597	1314.77	15.3911	11.4219	1625.71
						10.6467	11.0701	1024.73	26.864	10.7068	2348.68	81.1766	12.5658	10480.1	49.6497	8.23283	2655.71
						110.773	11.2329	11861.3	19.9179	10.5767	1896.44	109.936	13.3099	15240.1	117.929	9.07938	7691.05
						32.2626	3.73431	544.307	31.8605	9.26171	2260.1	193.117	12.3394	24948	9.35022	10.6049	820.002
						65.3805	4.86831	1520.62	40.173	2.3722	177.553	183.399	6.6228	8457.43	19.5416	9.67883	1422.33
						9.6577	12.1246	1217.1	46.6309	4.41798	747.123	14.9034	13.7033	2172.76	69.5668	9.14734	4544.41
						109.961	11.5492	12239.9	36.9247	2.3722	163.196	28.9406	17.1011	6562.48	19.8321	10.8229	1884.38
						75.1646	5.3073	3053.66	27.051	6.14894	925.338	38.3697	14.9112	6716.74	23.8479	6.81644	944.436
						62.6076	12.1236	7109.56	136.762	6.71326	5289.19	96.4638	9.50061	10024.2	8.14207	5.04186	150.625
						8.70685	2.3722	38.4816	90.5822	14.5415	16796.2	61.3289	6.31653	1973.62	23.7981	10.0527	1913.31
						27.7217	3.39717	267.988	25.3161	6.24818	756.114	153.196	8.65145	9392.86	20.9946	10.6028	1953.51
						37.4436	4.98212	781.54	17.6134	20.6796	5851.77	32.9302	4.81529	629.484	9.72673	6.32559	305.674
						39.4123	8.55646	3505.67	116.43	10.9554	11850	8.24298	6.94362	308.151	11.9315	7.97575	589.627
						37.467	10.2116	2517.94	32.5101	3.64258	385.254	13.8957	9.6547	1022.37	16.9704	7.7008	787.926
						18.8894	3.69592	213.462	14.735	7.7869	700.242	26.7746	6.93729	997.848	14.0605	7.09215	547.278
						12.853	11.014	1190.41	12.9655	9.29681	868.309	150.985	6.61162	6199.62	14.1997	8.21848	742.41
						55.917	9.7119	4203.23	12.7454	6.7478	450.931	58.1812	4.66228	1321.39	26.1042	7.34974	1170.44
						27.1382	4.80442	485.922	44.3371	11.4946	5454.05	39.7134	7.47693	1970.74	10.6485	14.7973	1838.54
						31.7627	9.01247	2155.38	27.113	12.4283	3232.82	31.1517	6.80543	1304.76	35.9622	12.4386	4551.66
						145.505	6.94136	5901.94	19.686	2.3722	87.006	56.4072	4.83218	1285.52	21.02	6.82273	773.03
						43.3867	7.24017	1788.02	30.6793	2.68937	191.48	56.308	4.22762	1155.77	23.4272	8.33103	1284.46
						76.0646	5.92552	2764.6	21.4823	4.31239	374.211				8.69196	9.48868	621.027
						27.46	10.1835	2185.19	27.1574	5.86516	730.748				21.1729	6.8141	777.183
						25.3095	6.69254	1178.45	20.4555	7.60795	936.267				51.8001	7.18036	2134.16
						10.0235	8.89572	624.026	46.5958	6.31486	1444.86				7.08068	8.69797	418.926
						26.2026	6.89204	980.512	8.35842	21.0862	2904.44				53.9716	9.59162	3886.66
						118.363	10.2869	9799.13	40.5331	2.9132	278.607				52.2534	9.63448	3881.57
						63.4617	5.75296	2389.77	43.7636	3.17459	409.664				18.862	8.26906	998.976
						13.8644	8.28399	873.615	27.8045	6.55072	896.674				12.4735	6.94339	467.457
						15.6167	9.74915	1124.39	134.415	8.3627	13214.8				18.4095	7.71997	859.65
						62.5123	9.07737	4044.73	31.2869	4.29027	503.398				12.797	6.45664	417.158
						31.065	5.25336	954.428	22.8249	8.58947	1315.59				22.7229	6.88042	841.455
						29.527	4.69908	622.454	137.544	4.50095	2530.03				8.86421	8.28849	490.998
						11.9959	6.32579	377.012	46.8451	8.36318	2648.8				9.4547	7.39448	403.738
						16.774	11.0702	1614.49	13.479	6.58586	443.712				27.6362	7.37729	1176.44
						73.8739	11.9814	8469.31	24.6531	9.26399	1650.47				5.89444	8.96154	368.287
						29.0069	9.07331	2034.25	50.9379	5.93814	1694.33				10.8652	8.80394	651.396
						13.7278	6.61002	489.885	34.2779	7.86199	1676.27				71.7193	7.44523	3076.62
						13.3534	8.68757	793.107	14.6165	7.96698	734.98				56.7674	10.2372	4707.86
						28.9298	13.1712	3999.65	31.3085	11.0183	3038.2				35.0364	7.67468	1819.69
						25.1456	11.2456	2484.82	16.8024	5.43968	380.122				27.9742	12.9986	3810.18
						16.3631	14.7917	2859.06	36.0852	8.71205	2362.39				27.0611	8.0578	1365.4
						55.8439	12.2389	6647.82	18.7323	5.77771	527.484				151.245	12.1547	18046.7
						87.4403	6.25508	3120.46	41.6002	3.211	389.119				61.0437	9.90148	5391.04
						29.9354	14.8531	5272.74	20.7665	5.87942	558.318				22.8247	5.43808	521.961
						11.6014	16.7041	2583.65	43.5373	7.78964	2156.78				57.5808	4.27804	1027.08
						54.9382	17.3352	14084.8	53.9262	3.96257	865.624				31.1219	6.18815	952.591
						21.0543	9.51101	1536.73	57.7671	2.69607	372.451				80.9719	5.50847	2001.33
						34.6272	7.99701	2088.34	25.6662	4.23057	418.514				21.8907	6.36271	692.383
						13.4669	13.6098	1983.81	23.3145	2.3722	103.043				16.9629	2.50484	99.5245
						10.0466	15.4377	1798.53	69.8136	4.61939	1305.11				37.4413	6.4317	1251.5
						47.3828	12.4724	5818.16	13.1855	6.14056	382.94				29.9643	6.19414	905.052
						36.7781	8.57333	2442.78	19.757	11.0703	1901.63				41.6284	6.8621	1851.62
						35.0521	14.4763	5822.65	46.1537	11.7458	4985.57				24.8457	1.98635	122.89
						16.1123	4.78122	376.696	64.9156	5.17719	1463				78.8552	4.18232	2314.33
						11.3736	11.3052	1137.27	7.70844	7.38016	307.882				33.949	7.8339	2126.45
						20.8806	10.605	1791.05	18.2058	11.7495	1958.7				61.1188	3.30285	649.054
						34.5773	6.00733	1135.75	18.1242	11.5289	1837.13				53.1609	4.71855	1224.16
						12.9445	11.5773	1371.87	31.7131	14.7847	5627.41				20.4227	9.24687	1331.06
						57.2768	17.9978	15575.9	60.9173	5.32306	1519.94				41.7334	7.20952	2077.59
						68.0164	16.2864	14446.6	23.4837	5.2386	592.538				58.7722	5.98686	1637.75
						78.9771	3.9493	2064.5	16.5634	5.88664	463.754				48.9739	10.6956	4488.72
						43.2573	15.9204	8902.52	79.7488	6.8683	3044.53				48.4835	3.90492	570.198
						47.0696	12.9553	6277.68	39.8433	6.93047	1557.98				49.5732	8.43111	3030.81
						29.4546	14.2508	4591.47	14.6136	13.3747	2011.54				3.35479	14.4967	563.976
						15.0529	18.9019	4189.15	61.8471	6.42234	2977.87				38.834	3.1635	410.997
						39.5542	19.8603	12054.5	21.1505	9.44862	1522.19				37.1957	3.73176	524.621
						73.5735	8.40584	4656.91	34.3417	10.312	2789.88				18.6227	14.6402	3140.48
						14.3961	11.0665	1418.55	31.135	7.28662	1596.64				47.2127	7.21891	1948.5
						47.5472	8.10342	2771.38	83.0052	9.47712	6884.94				10.5989	7.75204	490.287
						33.5879	9.39614	2513.85	35.8167	3.66129	473.51				32.3624	11.3489	3270.79
						20.9052	7.2801	871.748	25.3456	8.64344	1510.66				27.7477	4.14848	490.609
						10.834	15.9805	2130.7	92.909	5.83995	2808.06				14.9575	5.26532	345.668
						27.6271	20.1996	8755.91	35.9385	11.7585	3840.88				44.8266	7.37492	1975.13
						22.1752	11.3052	2337.2	17.1597	12.3463	1999.9				38.1279	7.9632	2288.4
						56.6495	12.7769	7453.76	67.6709	11.3173	6765.39				8.86237	3.52843	83.6275
						36.8303	11.057	3583.09	23.2224	12.0151	2646.19				38.7092	8.1432	2070.57
						9.16198	15.2957	1647.94	45.7159	5.89068	1600.44				57.1752	5.37889	1385.24
						32.5198	4.46449	917.505	39.5467	12.5693	4942.38				21.4231	6.28084	662.625
						14.9399	15.9533	2989.59	187.13	7.03258	8431.95				38.9782	2.91474	481.33
						28.7132	6.80453	1148.68	133.791	8.10539	7269.8				25.2778	9.77773	1873.1
						23.2722	5.26188	556.988	123.059	3.55227	1500.22				18.6865	12.8387	2456.18
						31.21	13.3939	4661.7	25.8586	12.5556	3162.97				107.537	4.32202	2044.64
						117.233	17.2081	27818.7	10.8015	7.29566	465.635				12.9319	7.00577	503.861
						42.6598	12.7831	5424.21	29.0955	7.63554	1366.02				11.3445	8.18636	604.01
						17.9559	8.13486	1012.18	9.60284	14.3568	1504.82				12.4949	7.58937	567.411
						65.4456	3.87269	894.878	73.9033	13.741	11113				11.4713	11.9378	1289.88
						52.3772	12.5507	8746.29	16.5054	12.3519	1929.37				22.016	8.3632	1215.97
						10.3398	24.2491	4838.88	31.8459	6.54863	1030				16.229	5.73279	412.538
						98.463	15.5054	18725.9	44.4225	13.1031	5869.8				24.2678	6.32163	781.125
						36.8373	24.9458	17903.7	68.9246	13.8428	10563.6				18.9489	4.92316	374.932
						49.8387	11.234	5556.35	75.007	5.31265	2980.39				65.184	7.59626	3948.64
						9.19972	16.2596	1949.73	117.678	11.508	12796.1				99.9031	8.4539	5884.13
						38.5657	8.34363	2793.91	7.30087	18.4504	1991.03				7.9083	11.7606	845.235
						19.528	5.13465	430.167	53.065	4.34431	891.598				45.0516	4.42594	1169.05
						15.7666	26.8195	8907.61	54.1621	10.1241	5000.86				59.5783	4.40637	1071.6
						127.337	6.25841	6441.92	27.3031	20.6909	9153.99				45.5952	5.45995	1475.45
						23.6594	2.89144	145.392	60.4442	16.9951	14218.6				32.6318	4.99481	661.338
						61.0539	25.4888	32277	30.733	8.58239	2605.72				10.6064	5.9571	296.815
						80.8823	3.8109	1092.05	17.7203	23.8001	7830.48				71.4567	2.65047	598.946
						22.7926	2.3722	100.737	52.8297	16.6158	11988.7				84.8604	9.57652	6184.37
						21.4857	2.3722	94.9602	90.4816	15.1976	16859.9				18.4749	3.63923	184.685
						43.787	5.62756	1501.1	41.5243	10.8294	4277.97				15.5035	3.72623	165.552
						45.198	9.31416	3186.92	19.4042	16.0242	3935.37				19.6904	3.16047	154.449
						69.7083	4.93854	1567.37	13.5362	15.015	2386.31				10.2774	3.08328	76.1795
						28.8548	4.89838	601.412	47.4005	17.4519	12896.5				37.2936	4.94957	767.33
						88.8151	16.4721	18761.8	39.997	17.7884	10024.7				30.4562	3.76429	398.531
						21.4668	7.4665	890.69	67.3697	6.21085	2262.88				43.596	1.68958	131.129
						37.1289	4.1146	555.634	22.755	6.67815	787.026				22.7234	2.16185	101.837
						19.5881	6.5637	668.518	103.014	5.89038	2968.03				41.8253	2.49057	221.526
						8.98295	7.75918	439.787	84.6918	8.42297	4787.88				22.4091	10.5281	1967.59
						22.3495	7.13666	920.857	22.1606	7.52469	1008.94				45.5348	3.58987	452.496
						54.2375	6.67759	1887.85	19.5815	5.71459	484.148				25.0062	7.51677	1130.52
						48.836	6.4227	1584.46	18.9133	3.95364	205.321				36.8625	5.87989	1791.73
						35.5099	5.99195	995.192	31.8317	5.45608	756.822				15.1129	3.07152	111.138
						80.6904	4.23071	1216.07	62.2448	23.5691	26869.3				13.1161	2.67077	72.8879
						99.7953	4.43198	1806.61	105.099	6.43805	3722.56				9.87007	2.87283	62.5407
						41.5817	3.99319	558.361	31.2508	24.3209	14273.5				4.91971	3.16282	38.6527
						28.6276	3.26722	225.566	11.88	7.4706	536.131				5.32796	3.16292	41.8627
						44.3507	6.34231	1403.87	11.9724	7.90734	595.774				28.6466	1.88859	91.3848
						31.5103	9.90302	2740.37	20.3225	4.28791	282.879				8.05129	2.92965	52.4406
						52.3299	8.42126	3063.39	40.7439	6.0884	1240.51				9.27509	2.86464	57.8087
						32.3478	4.56772	579.12	34.0811	6.75959	1236.89				14.7108	3.18979	116.348
						33.6829	3.81133	414.991	27.2703	5.14303	760.519				25.9698	5.67456	875.45
						55.7043	4.80288	1034.74	12.3574	8.96158	776.926				35.7332	3.73417	420.689
						68.3028	7.20678	3902.54	17.0774	7.22362	686.125				20.792	5.18958	447.109
						32.3853	7.68032	1878.62	64.4092	11.7791	8226.18				8.70069	4.40862	128.537
						142.7	13.256	20732.2	32.3548	24.9407	15836.7				49.6421	1.48857	92.3613
						71.6749	4.68333	1313.28	51.6162	4.46508	921.286				9.07844	3.15701	68.0127
						168.065	14.711	30795.2	80.3252	7.33024	3886.5				12.0919	2.89425	77.5368
						54.513	10.8435	5343.35	105.368	26.0859	56181.8				29.2545	2.07956	109.755
						53.6275	4.73713	979.752							13.0758	3.40591	129.564
						9.90282	6.3258	311.231							25.9477	4.1491	342.81
						42.4928	4.28994	711.585							31.8669	3.08979	237.959
						23.5804	3.73622	254.661							20.2676	2.54928	126.278
						36.0293	2.65458	202.443							19.1423	2.09626	74.5673
						15.6381	18.9539	4468							27.2696	3.0801	200.875
						90.0008	3.99327	1259.51							19.7592	1.3658	28.5646
						17.4568	5.60297	455.941							24.3758	4.83912	467.618
						46.6853	8.47208	2843.76							16.7002	2.20335	66.2259
						17.1941	9.48061	1134.5							23.6393	2.97957	164.464
						44.8864	15.2754	8342.42							8.5821	1.51555	15.4154
						23.3217	15.5558	4463.68							9.25592	1.1861	10.2271
						88.4176	11.8155	10481.4							19.8436	3.93385	239.701
						66.0213	7.70967	3616.97							32.9538	1.45231	67.3555
						43.3947	9.12523	2833.37							24.1328	1.29487	35.3488
						109.916	13.1113	15771.7							9.60308	4.64766	158.303
						13.8262	2.93697	88.0063							10.4981	3.01152	73.5962
						62.8145	9.59127	5070.76							17.4548	4.74735	322.122
						14.5202	7.64371	599.037							16.7081	2.00341	64.6646
						96.1991	11.2152	9510.31							12.8667	3.2228	103.368
						4.74438	2.3722	20.9687							14.0249	7.05489	613.979
						28.2333	5.16245	741.002							24.0083	4.46579	492.213
						49.0914	6.48483	1819.94							19.5415	3.16284	153.534
						14.2434	8.01764	687.717							12.3838	3.00745	87.291
						68.2923	11.2685	7110.19							17.4014	1.87562	62.8979
						26.6615	13.7816	4001.05							7.78723	1.1861	8.6043
															39.4719	2.56589	216.773
															7.633	3.16291	59.9736
															16.7349	2.1279	64.1471
															34.8408	1.92928	108.137
															13.5507	3.15111	105.882
															48.733	5.61395	1405.28
															15.2375	2.60834	83.4391
															52.4918	6.7978	2013.48
															26.5264	1.40416	44.0721
															9.7301	4.12026	178.287
															10.1525	4.07239	130.937
															21.6497	1.84872	64.0504
															26.8013	2.17342	111.059
															54.8138	3.90547	871.241
															15.9745	7.85463	772.249
															8.00013	3.0546	61.4652
															30.0358	4.94761	744.265
															4.91957	1.1861	5.43575
															21.3949	2.61446	188.69
															19.5501	2.80635	155.286
															5.30444	7.64372	247.896
															7.62809	2.71815	47.3749
															84.6586	3.63739	1019.75
															11.8479	1.1861	13.0911
															8.17486	1.1861	9.03261
															14.8438	1.4591	24.1868
															7.58984	2.13273	29.2263
															13.9366	2.67545	79.7108
															40.6595	2.33551	214.586
															32.0072	2.23899	156.642
															11.3104	1.1861	12.4971
															22.4563	1.1861	24.8125
															25.3176	1.51552	51.0244
															7.85521	3.1629	61.7188
															10.3225	1.36473	17.6696
