# Supplementary material for: Spatiotemporal dynamics and heterogeneity of renal lymphatics in mammalian development and cystic kidney disease
Source: eLife. 2019 Dec 6;8:e48183. doi: 10.7554/eLife.48183 (PMC6948954; doi:10.7554/eLife.48183)
Supplement: Figure 2—source data 2. [file elife-48183-fig2-data2.xls]

## Sheet: Statistics ex vivo
Clusters per kidney explant	Descriptive Statistics				Unpaired Student's t Test
	Condition	Control	40ng/ml VEGF-C		t	2.77
	n	7	6		p value	0.0184
	Mean	4.14	7.5		Mean Difference ± SEM	3.36 ± 1.21
	Standard Deviation	2.27	2.07		95% CI	0.69 to 6.03
	Minimum	1	5		R^2	0.41
	25% Percentile	2	5.75
	Median	4	7
	75% Percentile	6	10
	Maximum	7	10

## Sheet: Clusters per kidney ex vivo
Condition	Control	40ng/ml VEGF-C
Repeat 1	3	10
Repeat 2	7	7
Repeat 3	6	7
Repeat 4	2	5
Repeat 5	6	6
Repeat 6	1	10
Repeat 7	4
